1 **Transcriptome analysis reveals infection strategies employed by *Fusarium***  
2 ***graminearum* as a root pathogen**

3 Yi Ding<sup>a,c,\*</sup>, Donald M Gardiner<sup>a</sup>, Kemal Kazan<sup>a,b,\*</sup>

4 <sup>a</sup>Agriculture and Food, Commonwealth Scientific and Industrial Research Organization, 306 Carmody  
5 Road, St Lucia, 4067, Queensland, Australia;

6 <sup>b</sup>Queensland Alliance for Agriculture and Food Innovation (QAAFI), Alliance for Agriculture and Food  
7 Innovation (QAAFI), The University of Queensland, Brisbane, St Lucia, 4067, Queensland, Australia;

8 <sup>c</sup>Current address: The Plant Breeding Institute, School of Life & Environmental Sciences, Faculty of  
9 Science, The University of Sydney, Cobbitty, 2570, New South Wales, Australia;

10 \*Corresponding authors.

11 [yi.ding@sydney.edu.au](mailto:yi.ding@sydney.edu.au) (Yi Ding), [Kemal.kazan@csiro.au](mailto:Kemal.kazan@csiro.au) (Kemal Kazan)

12

13 **Abstract**

14 The fungal pathogen *Fusarium graminearum* infect both heads and roots of cereal crops  
15 causing several economically important diseases such as head blight, seedling blight, crown  
16 rot and root rot. Trichothecene mycotoxins such as deoxynivalenol (DON), a well-known  
17 virulence factor, produced by *F. graminearum* (*Fg*) during disease development is also an  
18 important health concern. Although how *F. graminearum* infects above-ground tissues is  
19 relatively well studied, very little is known about molecular processes employed by the  
20 pathogen during below-ground infection. Also unknown is the role of DON during root  
21 infection. In the present study, we analyzed the transcriptome of *F. graminearum* during root  
22 infection of the model cereal *Brachypodium distachyon*. We also compared our *Fg*  
23 transcriptome data during root infection with those reported during wheat head infection.  
24 These analyses suggested that both shared and unique infection strategies employed by the  
25 pathogen during colonization of different host tissues. Several metabolite biosynthesis genes

26 induced in *F. graminearum* during root infection could be linked to phytohormone production,  
27 implying that the pathogen likely interferes root specific defenses. In addition, to understand  
28 the role of DON in *Fg* root infection, we analyzed the transcriptome of the DON deficient *Tri5*  
29 mutant. These analyses showed that the absence of DON had a significant effect on fungal  
30 transcriptional responses. Although DON was produced in infected roots, this mycotoxin did  
31 not act as a virulence factor during root infection. Our results reveal new mechanistic  
32 insights into the below-ground strategies employed by *F. graminearum* that may benefit the  
33 development of new genetic tools to combat this important cereal pathogen.

## 34 **Introduction**

35 Fungal plant pathogens have adopted versatile strategies to colonize their hosts. While  
36 some fungal pathogens show strict host and tissue specificity, others can adjust their  
37 lifestyles to infect different hosts and tissues. Some fungal pathogens such as the rice blast  
38 *Magnaporthe oryzae* (Marcel et al., 2010; Sesma and Osbourn, 2004) and the corn smut  
39 *Ustilago maydis* (Mazaheri-Naeini et al., 2015), which commonly invade above-ground plant  
40 parts, can also undergo developmental processes resembling to root infecting fungi. Such  
41 changes in the pathogen may require sensing of host signals and we previously showed that  
42 sensing of root signals prior to root infection by *Fg* can indeed lead to developmental  
43 changes in the pathogen (Ding et al., 2020). As a member of the *Fusarium* species complex,  
44 *Fusarium graminearum* (*Fg*) causes Fusarium Head Blight (FHB) or scab, one of the most  
45 economically important diseases of cereal crops. FHB causes substantial yield losses and  
46 mycotoxin contaminations of grains, resulting in billions of dollars of economic losses  
47 worldwide and threatening our food supply and safety (Chen et al., 2019; Trail, 2009). Most  
48 studies on FHB have so far focused on wheat heads as the pathogen initially infects  
49 individual wheat florets from which it can spread to other florets through the rachis and can  
50 eventually colonize the whole spike. However, recent research has shown that *Fg* is also  
51 capable of infecting roots and young seedlings of wheat, barley and maize, causing crown  
52 rot, root rot and seedling blight (Henkes et al., 2011; Lanoue et al., 2010; Stephens et al.,

53 2008; Wang et al., 2015; Zhou et al., 2019). During the initiation of root infection, *Fg* forms a  
54 peg structure outside the root surface and move inter- and intra-cellularly without causing  
55 root necrosis. This early colonization stage is followed by a transition of the fungus to a  
56 necrotrophic life style where lesions develop and spread to stems and aboveground tissues  
57 (Wang et al., 2015).

58 The availability of the complete genome sequence of *Fg* makes investigations of global  
59 regulation of gene expression in this fungus feasible (Kazan and Gardiner, 2018a; Ma et al.,  
60 2013). Infection strategies of *Fg* evaluated by transcriptome analyses in different hosts and  
61 tissues exclusively during infection of their above-ground tissues such as heads, stems and  
62 coleoptiles revealed mostly distinct, but also common gene expression patterns (Boedi et al.,  
63 2016; Harris et al., 2016; Lysøe et al., 2011; Zhang et al., 2012, 2016). Interestingly, different  
64 cereal species can produce different defense-related metabolites (Dutartre et al., 2012) and  
65 such differences may explain why *Fg* might need to tailor its arsenal during colonization of  
66 different hosts (Harris et al., 2016). A recent comparative transcriptomic study of *Fg* also  
67 showed differential expression of fungal genes during infection of FHB resistant and  
68 susceptible wheat genotypes (Pan et al., 2018).

69 Although transcriptome studies have provided clues associated with host specificity of the *Fg*  
70 infection process, fungal transcriptomes of *Fg* mutants with altered virulence have rarely  
71 been tested on the same hosts. The mycotoxin deoxynivalenol (DON) is a *Fg* virulence  
72 factor during infection of wheat heads (Proctor et al., 1995). DON may also be needed  
73 during the interaction of *Fg* with its broader environment (Audenaert et al., 2013). The first  
74 step in DON biosynthesis is catalyzed by the trichodiene synthase *Tri5*, which cyclizes  
75 farnesyl pyrophosphate to trichodiene (Hohn and Beremand, 1989). In contrast to its strong  
76 expression pattern during wheat head infection, *Tri5* did not show increased *in planta*  
77 expression during wheat coleoptile infection, suggesting that DON's effect on pathogen  
78 virulence is tissue specific (Zhang et al., 2012). Other studies have suggested a crucial role  
79 for DON during the colonization of wheat stems by *Fg* and the related pathogens *F.*

80 *pseudograminearum* and *F. culmorum* (Desmond et al., 2008; Mudge et al., 2006; Powell et  
81 al., 2017; Scherm et al., 2013a). The recent finding where Fhb7-mediated FHB and crown  
82 rot disease resistance relies on DON detoxification also highlighted virulence function of this  
83 mycotoxin in wheat (Wang et al., 2020). Furthermore, DON is known to activate defense  
84 gene expression in wheat (Desmond et al., 2008). Indeed, host transcriptional changes  
85 observed in *Brachypodium distachyon* (*Bd*) and wheat spikelets infected by the *Tri5* deletion  
86 mutants ( $\Delta$ Tri5) differed from those by wildtype *Fg* (Brauer et al., 2020; Pasquet et al., 2014).  
87 DON biosynthesis in *Fg* is regulated by *Tri6* and *Tri10* transcription factors. Analyses of  
88 deletion mutants for these genes by transcriptome profiling during plant infection revealed  
89 significant transcriptional alterations for a large number of genes, many of which have not  
90 been implicated previously in toxin production (Seong et al., 2009). Genetic analyses  
91 undertaken in *Fg* have identified many genes influencing DON biosynthesis (Chen et al.,  
92 2019). However, DON-non-producing mutants have not been employed for evaluating the  
93 effect of this toxin on global transcriptional responses in *Fg*.

94 Phytohormones mediate immune responses in plants after pest or pathogen attack (Pieterse  
95 et al., 2009). In turn, plant pathogenic fungi have evolved ways to compromise host hormone  
96 pathways. This is achieved by degrading or producing phytohormones or interfering with  
97 their signaling pathways (Kazan and Lyons, 2014; Patkar and Naqvi, 2017). For instance,  
98 emerging evidence suggests that phytohormones such as abscisic acid (ABA), gibberellic  
99 acid (GA) and ethylene (ET) produced by fungi participate in pathogenicity (Chanclud and  
100 Morel, 2016). Previous studies indicated that *Fg* can likely produce auxin (IAA) and ET that  
101 may be utilized for attenuating host defenses during FHB (Foroud et al., 2019; Luo et al.,  
102 2016; Svoboda et al., 2019). In addition, SA hydroxylases were proposed to be involved in  
103 the degradation of host SA by *Fg* (Hao et al., 2019; Qi et al., 2019; Rocheleau et al., 2019).  
104 However, how hormonal compounds produced by *Fg* or the host plant are metabolized or  
105 involved in host infection is poorly studied. This is at least in part due to potential co-



106 existence of phytohormones derived from both host and the pathogen in the infected tissue  
107 and the lack of knowledge on fungal genes involved in phytohormone biosynthesis.

108 Currently, potential molecular mechanisms employed by *Fg* during root infection are  
109 unknown (Kazan and Gardiner, 2018a). A global transcriptome analysis would provide a  
110 powerful way to broadly reveal previously unknown features during root infection, thus  
111 promoting development of new strategies for combating this pathogen. In addition, to what  
112 extent DON may affect global transcription in the pathogen has not been investigated. We  
113 previously reported an RNA-seq based transcriptome profiling of *Fg* prior to its physical  
114 contact with *Bd* roots. This analysis enabled us to discover novel genes that are involved in  
115 nitric oxide (NO) production in *Fg* upon sensing of root signals (e.g. metabolites found in the  
116 root exudates) and pathogen virulence (Ding et al., 2020). In this study, using *Bd* as a  
117 cereal model, we asked how *Fg* behaves as a root pathogen. To answer this question, we  
118 analyzed the transcriptome of *Fg* during infection of *Bd* roots. We analyzed phytohormone  
119 levels of infected *Bd* roots to understand potential roles played by phytohormones derived  
120 from the fungus. In addition, by comparing the transcriptomes of WT *Fg* and the DON  
121 deficient *Tri5* mutant, we uncovered novel insights into global effects of DON on fungal gene  
122 expression and metabolism during the infection of host roots.

## 123 **Materials and methods**

### 124 **Plant and fungal materials and root infection assay**

125 The *Fg* CS3005 WT, *Tri5* mutant (Desmond et al., 2008) and *Tri5-GFP* expressing (Gardiner  
126 et al., 2009) strains were routinely maintained on Potato Dextrose Agar (PDA, BD Difco). *Bd*  
127 (Bd21-3) seeds were surface sterilized and pre-germinated on filter paper (Whatman) placed  
128 in 150mm x 25 mm petri dishes (Corning) for 5 days. *Bd* roots inoculation with the *Fg* strains  
129 was carried out as described previously (Ding et al., 2020). Briefly, agar plugs (0.25 cm  
130 diameter) taken from fungal culture plates (Carboxymethylcellulose agar) were transferred to  
131 center of minimum media (pH 7) plates and pre-grown for 3 days. Five-day-old *Bd* seedlings

132 were placed above the fungal colonies and inoculated for additional 5 days. Three biological  
133 replicates for *Fg* WT and  $\Delta$ Tri5 inoculated seedlings, and the *Fg* WT alone mycelia were  
134 produced by pooling materials from 10-12 plants or fungal mycelia.

### 135 **RNAseq and transcriptomic analyses**

136 Fungal and root materials were frozen in liquid nitrogen immediately after harvest. Total RNA  
137 was extracted from homogenized samples using a Qiagen RNeasy plant RNA extraction kit  
138 with on-column DNase I (Qiagen) digestion following manufacturer's instructions. RNA was  
139 quantified and quality-checked prior to sequencing. An Illumina HiSeq2500 High Output  
140 platform was used to generate 50-base pair single-end reads (Australian Genome Research  
141 Facility). Reads quality control, alignment, transcript abundance and differential expression  
142 (DE) analyses were performed according to the method described previously (Ding et al.,  
143 2020). For pairwise comparison (*Fg*WT-only vs. *Fg*WT-*Bd*, or *Fg*WT-*Bd* vs.  $\Delta$ Tri5-*Bd*),  
144 different sample files were normalized and merged. Reads were measured as FPKM  
145 (Fragments Per Kilobase of gene model per Million reads mapped), and a normalization  
146 method developed by Hart et al. (2013) was used and to eliminate background noise of  
147 FPKM values where genes with a Gaussian-fit derived  $\log_2$ (FPKM) value higher than -3 were  
148 considered as expressed.  $|\log_2$  fold change $| \geq 1$  and Benjamini and Hochberg-adjusted P  
149 value  $< 0.05$  were applied to DE genes. RNAseq data are available at NCBI under the  
150 accession no. PRJNA631873.

### 151 **Annotation and functional categorization of differentially expressed genes (DEGs)**

152 BLAST2GO (Götz et al., 2008) was used to assign annotations for fungal DEGs. BLASTP  
153 reciprocal best hit analyses were performed in order to identify putative orthologous genes  
154 and match unique gene identifiers of the *Fg* CS3005 and PH-1 strains (Gardiner et al., 2014).  
155 Based on the PH-1 identifiers, classification ontology of DEGs from pairwise comparisons  
156 was annotated with FungiFun2 and subsequently subjected to enrichment analyses  
157 (<https://elbe.hki-jena.de/fungifun>). Functional categories were considered as enriched in the

158 genome if an enrichment Benjamini-Hochberg adjusted P value is smaller than 0.05.  
159 Prediction of protein cellular localizations, secretome and putative effectors, transporters,  
160 carbohydrate-active enzymes, lipases, secondary metabolism enzymes and transcription  
161 factors was according to previously described methods (Ding et al., 2020).

#### 162 **Identification of homologous genes between *Fg* and *Fp***

163 All RNAseq reads were mapped to the *Bd* reference genome first. Unmapped reads were  
164 extracted and aligned to the *Fg* CS3005 and *Fp* CS3096 reference genomes, respectively,  
165 as per previously described (Ding et al., 2020). Only reads that could be mapped to both  
166 genomes were retained. Next, read counts measured as FPKM values were log transformed,  
167 normalized and subjected to PCA analysis (Fig. S4). Homologous genes within *Fg* and *Fp*  
168 were identified using a reciprocal best BLAST hit (RBBH) approach. Gene orthologs with  
169 identity of equal or higher than 99% were kept and used for syntenic analysis using a R  
170 package shinyCircos (Yu et al., 2018).

#### 171 **cDNA synthesis and quantitative real-time PCR analysis**

172 0.5-1 µg total RNA was prepared for first-strand cDNA synthesis using the superscript IV  
173 synthesis kit (Invitrogen, USA) and quantitative real-time RT-PCR (qRT-PCR) was  
174 performed using the ViiA 7 real-time PCR detection platform (Applied BioSystems). Primers  
175 were based on previous studies (Ding et al., 2020; Voigt et al., 2005). Expression levels  
176 were normalized to the fungal house-keeping gene *α-Tubulin* and were averaged over three  
177 biological replicates.

#### 178 **Root sectioning and fluorescence microscopy**

179 Root dissection was carried out following a previous described method (Ursache et al.,  
180 2018). Briefly, roots were harvested at 5dpi and fixed with 4% paraformaldehyde (Sigma) in  
181 PBS buffer (pH=6.9) overnight, washed twice with PBS buffer and cleared with ClearSee  
182 solution (Ursache et al., 2018) for 3 days. After clearing, roots were hand sectioned from 3

183 cm above the tips and stained with 0.2% Basic Fuchsin (Sigma). To image GFP and Basic  
184 Fuchsin fluorescence, root samples were observed using 488-nm excitation / 519-nm  
185 emission, and 561-nm excitation / 625-nm emission, respectively, on a Zeiss Axio Imager  
186 M2 microscopy.

#### 187 **UHPLC quantification of metabolites**

188 For metabolite extractions, mock and *Fg*-infected roots, fungal mycelia and media samples  
189 were collected at 5 dpi, immediately frozen and ground in liquid nitrogen. 100 mg of fine-  
190 ground materials were resuspended in 2 mL extraction buffer (Ethyl acetate: methanol:  
191 dichloromethane, 3:2:1 v/v). 5  $\mu$ L extracts from 6 replicates of each conditioned sample were  
192 injected into a Waters ACQUITY ARC UPLC system with Photodiode Array and passed  
193 through a Phenomenex Kinetex column (C18, 1.7  $\mu$ m, 100  $\times$  2.1 mm). The mobile phases  
194 consisted of solvent A (10 mM ammonium formate in water) and solvent B (10 mM  
195 ammonium formate in acetonitrile). The gradient program was a linear gradient from 2-40%  
196 solvent B delivered over 22 min followed by 40-80% B over 1.5 min at a constant flow rate of  
197 0.4 mL per minute. As external standards, jasmonic acid (Sigma, 10 mM), methyl-jasmonate  
198 (Sigma, 40 mM), salicylic acid (Sigma, 10 mM), deoxynivalenol (Sigma, 100 ng/ $\mu$ L),  
199 gibberellic acid (Sigma, 10 mM), indole-3-actinic acid (Sigma, 2 mM) were freshly prepared for  
200 serial dilutions (10x, 100x, 1000x, 10000x). Metabolites were quantified according to the  
201 concentration-gradient derived standard curves of external standards. Chromatography  
202 absorbance data were aligned using the following wavelengths: 204nm (for SA, JA and  
203 MeJA), 254nm (for IAA and DON) and 214nm (for GA), and extracted using the Empower 3  
204 software (Waters).

#### 205 **Results and discussion**

##### 206 **The *Fg* transcriptome during *Bd* root infection**

207 Despite various studies investigating the transcriptome of *Fg* during colonization of above-  
208 ground tissues, *Fg* transcriptome during root infection has not been studied before (Kazan

209 and Gardiner, 2018a). Therefore, here, we first investigated the *Fg* transcriptome during root  
210 infection of the model host *Bd*. This transcriptome experiment, which was initially designed  
211 for the discovery of a novel host-sensing mechanism in *Fg* prior its physical contact with  
212 roots, included three replicates of each of 1) *Fg* grown on minimal media (MM) (*Fg*-only) 2)  
213 *Fg*WT and *Bd* roots grown together on MM without physical contact, 3) WT *Fg* colonizing *Bd*  
214 roots on MM (*Fg*WT colonization) and 4) a *Tri5* mutant colonizing *Bd* roots ( $\Delta$ *Tri5*  
215 colonization). Previously, by comparing 1 with 2, we discovered new regulators involved in  
216 host sensing-mediated NO production (Ding et al., 2020). Here, we report on the  
217 comparisons between 1 and 3, 1 and 4 and 3 and 4, as detailed analyses of these have not  
218 been reported previously.

219 A total of 174,399,800 single-end reads, including 114,577,185 reads from *Fg* alone and *Fg*-  
220 infected *Bd* root samples (Ding et al., 2020) and 59,822,615 reads from the  $\Delta$ *Tri5* root  
221 samples were generated by Illumina sequencing of mRNA libraries (Suppl. data 1). Prior to  
222 read mapping to the *Fg* CS3005 genome (Gardiner et al., 2014), reads aligned to the *Bd*  
223 genome were filtered. Of these filtered reads across all the samples, at least 91%, ranging  
224 from 5 to 19.9 million, were mapped to the *Fg* reference genome. Among these mapped  
225 reads, less than 0.3% matched to multiple genomic locations (Suppl. data 1). Out of the  
226 12590 transcripts detected, 11942, 11291 and 11327 were found actively expressed in *Fg*-  
227 only, in WT *Fg* colonization and in *Tri5* mutant colonization conditions, respectively.

228 Our analysis revealed a total of 2049 genes that were differentially expressed (DE) ( $\log_2$  FC  
229  $\geq 1$  and adjusted p value  $< 0.05$ ) (Fig. 1A, Suppl. data 2) during colonization of *Bd* roots  
230 relative to *Fg*-only. Of these, 1281 and 768 were up- and down-regulated, respectively,  
231 during root colonization. The proportion of DE genes (DEGs) (around 20% of total number of  
232 genes found in the *Fg* genome) was similar to those observed during above-ground infection  
233 by *Fg* in other studies (Brown et al., 2017; Puri et al., 2016). A previous study indicated that  
234 some defense genes are similarly regulated in wheat roots and spikes in response to *Fg* (Q.  
235 Wang et al., 2018), suggesting that common strategies might be employed by *Fg* to infect

236 different tissue types. Indeed, we previously reported that fungal knockouts of several DEGs  
237 identified here showed defects in both root and head infection (Ding et al., 2020).

### 238 **Fungal processes employed by *Fg* during root infection**

239 Detailed analysis of DEGs (*Fg*-only vs WT *Fg* colonization) revealed a number of enriched  
240 functional categories likely to be used by the pathogen during root infection. Below, some of  
241 these functional categories were discussed in more detail.

### 242 **Genes encoding plant cell wall degrading enzymes (CWDE)**

243 The *Fg* genome comprises a large number of genes encoding hydrolytic enzymes,  
244 transporters, secreted proteins and multiple gene clusters associated with secondary  
245 metabolite biosynthesis (Scherm et al., 2013; Sieber et al., 2014). These enzymes, non-  
246 enzymatic proteins and secondary metabolites together are generally considered fungal  
247 pathogenicity factors and their deployment during *Bd* root colonization indicates the  
248 importance of these pathway for sustaining the infection process. Indeed, over 30% of DEGs  
249 encode secondary metabolism enzymes (SMEs), secreted proteins, carbohydrate-active  
250 enzymes (CAZymes) and transporters (Fig. 1A). The most enriched categories for  
251 significantly up-regulated genes were associated with carbohydrate hydrolytic pathways  
252 (Suppl. data 3). Functional annotations showed that over half of the *in planta* activated  
253 CAZymes displayed modular structures related to CWDE acting on wall polymers such as  
254 cellulose, hemicellulose, lignin and pectin (Fig. 1B, Suppl. data 4), indicating the utilization of  
255 carbon from plant cell walls is a prominent capability of *Fg* during the colonization of *Bd* roots.

### 256 **Genes encoding secreted proteins and putative effectors**

257 Fungal pathogens produce many small secreted proteins or effectors to help facilitate host  
258 colonization. However, relatively little is known about potential *Fg* effectors. By comparing  
259 our DEGs with the previously defined *Fg* secretome (Brown et al., 2012) and using the  
260 EffectorP 2.0 software (Sperschneider et al., 2018), we identified 250 putative secreted  
261 proteins along with 65 predicted fungal effector encoding genes (Fig S1C, Suppl. data 4 and

262 5). Many of these secreted protein genes, including 189 induced ones (Suppl. data 5),  
263 encode putative lipases and peptidases predicted to perform hydrolytic functions (Fig. 1C).  
264 Among the 65 predicted effector-encoding genes, 52 were significantly up-regulated during  
265 *Bd* root infection (Suppl. data 5). Some of these DE genes were reported to encode effectors  
266 actively secreted by *Fg* during *in vitro* growth. For example, *FG05\_04074* encodes a protein  
267 of unknown function detected in two different secretomes (Lu and Edwards, 2016; Yang et  
268 al., 2012). Other putative effectors with annotated functional domains also found in previous  
269 studies included two glycoside hydrolases (*FG05\_11037* and *FG05\_06466*), a putative  
270 acetyltransferase (*FG05\_11280*), a putative endonuclease (*FG05\_03365*) and a cerato-  
271 platanin family protein (*FG05\_10212*) for which roles of protection against host defense have  
272 been proposed (Lu and Edwards, 2016; Quarantin et al., 2016; Yang et al., 2012).  
273 Interestingly, the top induced effector candidates were mostly with predicted enzymatic  
274 functions (Suppl. data 5). Function of these differentially regulated putative effectors, such as  
275 *FG05\_04735* encoding a putative hypersensitive response-inducing elicitor and  
276 *FG05\_02255* a LysM domain containing protein (Suppl. data 5), could be predicted in  
277 comparison with those containing similar structural domains from different fungal pathogens  
278 and generally associated with host penetration, spore dispersal, triggering plant defense  
279 responses, inhibiting chitin-induced immunity or protecting against plant lysis (De Jonge et  
280 al., 2010; Khan et al., 2016; Lo Presti et al., 2015; Marshall et al., 2011; Mentlak et al., 2012).  
281 Although exact functions of these genes up-regulated during infection are largely unknown, it  
282 can be speculated that these secreted proteins and putative effectors could benefit the  
283 fungus during the colonization of host roots.

#### 284 **Genes encoding secondary metabolism enzymes (SME)**

285 *Fg* is known to produce many secondary metabolites (SMs) during infection (Ma et al., 2013).  
286 In line with this, a strong induction of expression could be observed for genes encoding key  
287 signature enzymes (Fig. S1A), including the longiborneol synthase *CLM1* (*FG05\_10397*),  
288 butenolide synthase (*FG05\_08079*), *TRI5* and the terpenoid synthase *DTC1* (*FG05\_03066*)

289 during infection (Suppl. data 6), suggesting that the corresponding products culmorin,  
290 butenolide, trichothecene and carotenoid may be the major mycotoxins delivered by the  
291 fungus to facilitate root infection. Among them, butenolide and trichothecene pathways are  
292 known to be co-regulated *in vitro* and *in planta* (Sieber et al., 2014). In contrast, down-  
293 regulation or very low *in planta* expression of other key SME genes, such as *PKS12*, *NPS2*,  
294 *NPS1*, *PKS4* and *PKS10* (Suppl. data 6), indicates that certain types of mycotoxins such as  
295 aurofusarin, ferricrocin, malonichrome, zearalenone and fusarin C might not be highly  
296 produced by *Fg* during root colonization. Aurofusarin does not affect wheat head infection by  
297 *Fg* (Malz et al., 2005), whereas ferricrocin and malonichrome have been shown to be  
298 important for pathogenesis-related development of *Fg* (Oide et al., 2014). The tailoring  
299 enzyme genes are usually clustered and co-regulated with the corresponding signature  
300 enzyme genes in *Fg*. These genes encode cytochrome P450s, oxidoreductases,  
301 acyltransferases and methyltransferases mainly involved in the SM pathway responsible for  
302 biosynthesis and modification of SM products (Sieber et al., 2014). Therefore, up-regulation  
303 of a large portion of tailoring enzyme genes found in this study is consistent with the  
304 regulation pattern of the signature enzymes (Fig. S1B).

### 305 **Genes encoding fungal transporters**

306 Transporter encoding genes mostly induced during *Bd* root colonization comprised a large  
307 group within the DE gene list (Fig. S1C, Suppl. data 7). Indeed, the regulation of transporter  
308 genes, particularly those associated with carbohydrate and nitrogen uptake as well as the  
309 ATP-binding cassette transporters (ABC transporters), is often linked to fungal nutrient  
310 assimilation, sensing, defense and pathogenicity status in pathogenic fungi (Abou Ammar et  
311 al., 2013; Coleman and Mylonakis, 2009; Divon and Fluhr, 2007; Gardiner et al., 2013;  
312 Schuler et al., 2015; Struck, 2015; Yin et al., 2018). Interestingly, the major facilitator  
313 superfamily (MFS) transporters associated with phosphate (Pi) transport and multidrug  
314 resistance (MDR) were mostly down-regulated during root infection compared to media  
315 alone controls (Fig. S1C, Suppl. data 7). During colonization of maize stalk, *Fg* overcomes Pi



316 limitation by up-regulating high-affinity Pi transporter genes *FGSG\_03172* and *FGSG\_02426*  
317 (Zhang et al., 2016). The observation here that expressions of these genes during *Bd* root  
318 infection significantly reduced indicates a relatively rich root Pi environment under the  
319 experimental conditions and the time point examined. The down-regulation of MDR  
320 transporter genes suggested that they are possibly not essential for *Fg* to resist against root-  
321 derived anti-fungal compounds or self-derived toxins. The elevated expression of a large  
322 number of MFS-type carbohydrate transport genes together with the induction of PCWDE  
323 genes indicate that *Fg* preferentially utilizes carbon to accomplish the infection cycle and a  
324 state of glucose depletion may exist at the examined stage. The top induced ABC  
325 transporters (Suppl. data 7) exclusively belonging to the ABC-G type transporters are known  
326 to be associated with self-protection, possibly by effluxing of antifungal compounds in many  
327 pathogenic fungi (Coleman and Mylonakis, 2009). Thus, it is likely that these ABC  
328 transporters together with the MFS family multidrug resistance transporters could contribute  
329 to the virulence and fitness of *Fg* by detoxifying plant defense compounds.

330 We also observed that genes encoding amino acid-related transporters such as the amino  
331 acid/polyamine/organocation (APC) family and the amino acid/auxin permease (AAP)  
332 family transporters, which are the major nitrogen transporters, were differentially expressed  
333 during root infection. In contrast, no inorganic nitrogen transporter gene showed altered  
334 expression (Suppl. data 7). This suggests that *Fg* root infection requires plant-derived  
335 organic nitrogen sources, and is consistent with the finding that polyamines as well as their  
336 amino acid precursors are potent DON inducers in *Fg* and play important roles during head  
337 infection (Gardiner et al., 2010, 2009). Interestingly, the highest induced transporter  
338 (*FG05\_02278*, over 10-fold logFC) gene encodes a putative APC family protein transporter  
339 involved in choline uptake. Choline was identified as one of the major fungal growth  
340 stimulators in wheat anthers and implicated in promoting *Fg* virulence (Strange et al., 1972).  
341 Thus, it is possible that choline, in addition to amino acids and their derivatives, is another  
342 major factor contributing to *Fg* root colonization.

343 **A small set of ‘core’ genes is activated during infection of different hosts and tissues**  
344 **by *Fg***

345 To obtain additional insights into *Fg* pathogenicity, we compared the *Fg* genes found to be  
346 induced during root colonization in this study with those previously reported to be induced  
347 during the colonization of other hosts or tissues (Brown et al., 2017; Harris et al., 2016;  
348 Lysøe et al., 2011; Zhang et al., 2012, 2016). These previous studies have reported several  
349 subsets of *in-planta* expressed *Fg* genes at multiple infection time-points and different  
350 disease development stages. To make a broader comparison, *Fg* genes that were  
351 commonly induced during infection at any of the studied time-points were selected. These  
352 included 3591 *Fg* genes induced during the infection of wheat heads (Brown et al 2017),  
353 5061 genes expressed during the infection of wheat and barley heads and maize ears  
354 (Harris et al 2016) as well as 344 and 3066 genes induced during the infection of wheat  
355 juvenile coleoptiles (Zhang et al., 2012) and maize stalks (Zhang et al., 2016), respectively  
356 (Suppl. data 8). Through these comparisons, a total of 38 *Fg* genes commonly induced  
357 across all gene lists were identified (Fig. 2A, Suppl. data 9). Some of these genes were also  
358 differentially expressed between a FHB resistant and a susceptible wheat genotype (Pan et  
359 al., 2018). Unexpectedly, no mycotoxin- or pathogenicity-related SME genes were present  
360 among these 38 genes (Fig. 2B). An ABC transporter gene, *FG05\_04580* (*FgABC1*), and its  
361 flanking neighbor *FG05\_04581*, which encodes a transcription factor highly inducible by the  
362 mycotoxin zearalenone (Lee et al., 2010), were found among these common genes. Deletion  
363 of *FgABC1* causes reduced virulence of *Fg* on tested wheat tissues (Abou Ammar et al.,  
364 2013; Gardiner et al., 2013). Interestingly, *FgABC1* and *FG05\_04581* homologs in the  
365 closely related pathogen *F. culmorum* were both highly induced by the antifungal compound  
366 tebuconazole (Hellin et al., 2018). This indicates that *FgABC1* and *FG05\_04581* could be  
367 involved in self-protection against various defensive chemicals consistent with the  
368 observation that *FgABC1* contributes to protection against the fungicide benalaxyl (Gardiner  
369 et al., 2013). Furthermore, most of these common genes encode non-SM enzymes such as

370 CAZymes, peptidases and putative effectors. Among them, *FG05\_03624*, a gene encoding a  
371 secreted xylanase, was previously shown to promote necrosis during *Fg* head infection  
372 (Moscetti et al., 2015). Protein homologs of several of these genes were also shown to be  
373 virulence factors in other fungal pathogens. For instance, *FG05\_00028* is homologous to  
374 metallopeptidases (MEP1), which were shown to be apoplastic effectors in *F. oxysporum*  
375 and *M. oryzae* (Jashni et al., 2015; Yan and Talbot, 2016). In *F. oxysporum*, the  
376 metallopeptidase FoMEP1 and the serine protease FoSEP1 act synergistically to cleave  
377 host chitinases and prevent their degradation of fungal cell walls (Jashni et al., 2015). Indeed,  
378 a serine-type proteinase inhibitor encoded by *FG05\_08012* found in our gene list, shows  
379 high similarity to FoSEP1 (Suppl. data 9). Another putative hypersensitive inducing elicitor  
380 *FG05\_04741* shows significant homology to the *Verticillium dahlia* effector PevD1, which  
381 was shown to be a secreted elicitor triggering host defense and cell death (Liang et al.,  
382 2018). We hypothesize that these putative *Fg* effectors may perform roles that are similar to  
383 those found in other fungal pathogens. Taken together, it can be hypothesized that a  
384 common set of *Fg* genes seems to play essential roles in *Fg* for successful colonization of  
385 different tissue types.

### 386 ***Fg* genes specifically upregulated in *Bd* roots**

387 We have identified 257 *Fg* genes that were exclusively upregulated during *Bd* root infections  
388 (Fig. 2A). Functional category analysis showed a significant enrichment for genes involved in  
389 transmembrane transport and cellular import (FDR = 0.00334). Of 34 transporter encoding  
390 genes induced, 12 were predicted to be associated with carbon transport (Suppl. data 10).  
391 This supports the finding discussed above that carbon utilization by *Fg* plays a role during  
392 *Bd* root colonization. Three ABC-G and two MDR transporters (Suppl. data 10) found among  
393 the enriched transporters might be specifically associated with detoxification of *Bd* root  
394 defense compounds. Among the four predicted effectors induced in roots (Suppl. data 10),  
395 the putative host-necrosis inducer protein *FG05\_10212* was shown to be constitutively  
396 expressed during infections of wheat heads and *in vitro* and confirmed as an extracellular

397 protein (Lu and Edwards, 2016). The induction of this effector might contribute to necrosis  
398 observed in the infected *Bd* roots. Notably, of the seven putative *Fg* PCWDEs whose  
399 transcripts were only induced in *Bd* roots, five use lignin as substrate (Suppl. data 10),  
400 suggesting that lignin-degradation by *Fg* in *Bd* roots. Overall, while some common infection  
401 strategies may be employed by *Fg* during infection of different hosts and tissue types, there  
402 appears to be also unique processes used based on the activation of specific *Fg* genes  
403 during root colonization.

404 **Partially shared infection strategies may be used by *Fg* and its sister species *Fp***  
405 **during above- and below-ground infection of *Bd***

406 Previously, above-ground responses to the infection of *Bd* seedlings by *F.*  
407 *pseudograminearum* (*Fp*), another fungal species that is highly similar to *Fg* at the whole  
408 genome level (Gardiner et al., 2018) and was previously considered to be the same species  
409 as *Fg* (Kazan and Gardiner, 2018b), have been investigated (Powell et al., 2017). Both *Fg*  
410 and *Fp* show highly similar infection patterns on *Bd* (Fitzgerald et al., 2015). In addition, most  
411 genes are located in similar genomic regions in both fungi, whereas only a few species-  
412 specific genes, which could not be revealed by syntenic analysis, were found in genomic  
413 locations displaying high SNP densities (Gardiner et al., 2018). To further explore organ  
414 specificity of *Fg* infection on the same host, we compared the transcriptome of *Fg* with that  
415 of *Fp* (NCBI accession no. SRR3695327), during above ground infection of *Bd* at the same  
416 time point. Only *Fg* and *Fp* orthologous genes, which could be mapped to both of the  
417 genomes and share an identity of  $\geq 99\%$  were retained in this comparison. This stringent cut-  
418 off allows comparisons of only highly conserved genes that might be predicted to show  
419 similar pattern in expression and function in these two closely related fungal species.

420 In total, 1835 of the *Fg* DEGs were matched to *Fp* and formed a syntenic map (Fig. 3A and  
421 Suppl. data 11) consistent with the previously revealed genome structures (Gardiner et al.,  
422 2018). These genes were, in general, similarly expressed in *Fg* and *Fp* as indicated by the  
423 logarithmic transformed FPKM values (Fig. 3A). However, some variability in gene

424 expression between the two species could be observed, particularly for genes found on  
425 chromosome 2 where the *Fg* orthologs tend to be preferentially expressed, as reflected by  
426 the expression heat map (Fig. 3A). Parts of chromosome 2 were previously identified as  
427 regions of the *Fg* genome that are rapidly evolving (Sperschneider et al., 2015). By manual  
428 curation, we selected and annotated the top 20 variant genes (Fig. 3B) that included three  
429 MFS-type transporter genes and an acetate permease homolog as well as several putative  
430 defense associated genes encoding a cell-wall glycoprotein (FG05\_03352), peptidases  
431 (FG05\_08075 and FG05\_08141), and glucosidases (FG05\_03387 and FG05\_08265). A  
432 Zn<sub>2</sub>Cys<sub>6</sub> transcription factor (FG05\_03727), which shares the highest similarity to the yeast  
433 multidrug and oxidative stress resistance regulator STB5 (Larochelle et al., 2006), was  
434 identified. Accordingly, we found several oxidative stress responsive genes encoding a  
435 molybdopterin oxidoreductase (FG05\_02880), NADH-flavin oxidoreductase (FG05\_08077)  
436 and a putative flavohemoglobin (FG05\_04458). Notably, *FG05\_03914* encoding a putative  
437 isochorismatase (ISC) gene was only expressed in *Fg* during infection of *Bd* roots. ISC-like  
438 effectors in filamentous pathogens are conserved virulence factors that can subvert plant  
439 salicylic acid (SA) pathway and interfere with host immunity (Liu et al., 2014). Resistance to  
440 biotrophic and hemi-biotrophic pathogens is usually conferred by the host SA pathway  
441 (Pieterse et al., 2012), and therefore, ISCs might be employed by *Fg* to support its hemi-  
442 biotrophic lifestyle to attenuate SA produced by the roots. The absence of *Fp* ISC  
443 transcription is consistent with the observation that host SA levels were not elevated in *Bd*  
444 plants at the early stages of infection (Powell et al., 2017). Host plants may activate tissue-  
445 specific defense signaling in response to below- and above-ground attacks (Lyons et al.,  
446 2015). To manipulate such defense responses, a fungal pathogen must evolve to a high  
447 flexibility for successful infection progressed in different host tissues. Despite the use of two  
448 fungal species, the data provided here may suggest shared infection strategies, including the  
449 interference with host defense, employed by *Fg* to support its belowground colonization.

450 **DON influences different fungal processes in *Fg* during *Bd* root infection**

451 The trichothecene mycotoxin DON has been shown to significantly inhibit *Bd* root growth  
452 (Pasquet et al., 2016). However, to the best of our knowledge, there has not been any study  
453 examining the effect of DON on different fungal processes in *Fg*. Therefore, we conducted  
454 an RNA-seq analysis by infecting *Bd* roots with DON producing and deficient strains to  
455 determine *Fg* genes whose expressions are modulated by DON. We first focused on genes  
456 up-regulated in the DON deficient  $\Delta$ Tri5 mutant strain relative to WT. Of 973 genes  
457 differentially expressed between  $\Delta$ Tri5 and WT, 432 genes were expressed at higher levels  
458 in  $\Delta$ Tri5 (Fig. 4A, Suppl. data 12). These genes were subjected to functional enrichment  
459 analysis based on the MIPS FGDB (*Fusarium graminearum* Genome Database Functional  
460 Catalogue classification) (Güldener et al., 2006). This analysis showed that these genes are  
461 enriched for transport (FDR = 0.0016) of carbon-compounds, carbohydrates, and heavy  
462 metal ions, disease, virulence and defense (FDR = 0.005) and homeostasis of phosphate  
463 (FDR = 0.02). A relatively smaller portion of fungal pathogenicity and metabolism associated  
464 genes encoding CAZymes, SMEs, transporters and secreted proteins were induced in  $\Delta$ Tri5  
465 relative to WT (Fig. 4B-C, Fig. S2 and suppl. data 12-13). Only metabolic pathway genes  
466 encoding methyl- and glycol-transferases as well as phosphate, lipid and polyamine  
467 transporters were preferentially induced (Fig. S2). Host-derived phosphates, lipids as well as  
468 polyamines may influence *Fg* infection in multiple host tissue types (Gardiner et al., 2010;  
469 Zhang et al., 2016). Their enhancement might be due to a positive feedback to the lack of  
470 DON to balance the fungal metabolism and cell structure in root proliferation. In addition, 28  
471 CAZyme encoding genes were expressed higher in  $\Delta$ Tri5 than in WT and many of these  
472 were putative PCWDEs involved in lignin degradation (Fig. 4B). Lignin is one of the major  
473 barriers against fungal pathogens (Bhuiyan et al., 2009). Defense related or unrelated lignin  
474 content at fungal penetration sites might affect *Fg* intra-cellular progression (Zhang et al.,  
475 2016). In wheat roots, *Fg* colonization could be observed in lignin-rich vascular bundles  
476 (Bhandari et al., 2018; Wang et al., 2015). Therefore, the upregulation of lignin-degrading  
477 enzymes in  $\Delta$ Tri5 could be beneficial to the fungus to compensate DON deficiency and  
478 assist root colonization. In line with this, we observed reduced lignin deposition in roots

479 colonized by  $\Delta$ Tri5 relative to the roots either mock-inoculated or colonized by WT *Fg* (Fig.  
480 5).

481 Seven of the 33 secreted protein genes induced in  $\Delta$ Tri5, including a pathogenesis-related  
482 protein 1 (PR1) homolog (FG05\_03109) and a putative cutinase (FG05\_03457), may be  
483 considered putative effectors. The most differentially regulated SME genes in  $\Delta$ Tri5 were  
484 tailoring enzyme genes encoding cytochrome P450s and oxidoreductases (Fig. S2A and  
485 S2B). Surprisingly, most DEGs with elevated transcripts levels in  $\Delta$ Tri5 during root  
486 colonization (405 out of 432 genes) were expressed either significantly lower in WT during  
487 *Bd* root infection than *Fg* only or remained unchanged comparing to WT *in vitro* (Suppl. data  
488 12). Besides, we noticed that none of the above-mentioned core genes was reduced in  $\Delta$ Tri5  
489 during infection, supporting the notion that these genes may contribute to infection more  
490 than others, independently of fungal DON production.

491 We next looked at the 541 significantly downregulated genes in  $\Delta$ Tri5 relative to WT in roots.  
492 The most enriched functional categories during root infection were C-compound and  
493 carbohydrate metabolism (80 genes, FDR = 0.00008), disease, virulence and defense (16  
494 genes, FDR = 0.01), secondary metabolism (27 genes, FDR = 0.01), protein or peptide  
495 degradation (26 genes, FDR = 0.01) and transport facilities (42 genes, FDR = 0.03) (Suppl.  
496 data 14). In addition, we found two sets of adjacent genes *FG05\_02297-FG05\_02309* and  
497 *FG05\_08077-FG05\_08084* that showed reduced expression in  $\Delta$ Tri5. Of these two sets, the  
498 latter genes, which are part of the mycotoxin butanolide cluster, shared similar regulation  
499 pattern with the *Tri* (*tricothecene*) cluster genes during infection of wheat heads (Boedi et al.,  
500 2016). In the saprophytic fungus *Trichoderma arundinaceum*, the loss of tricothecene  
501 production likely contributed to an increase of fungal secondary metabolites (Lindo et al.,  
502 2019, 2018). Therefore, DON seems to affect fungal metabolism during *Fg* infection in *Bd*  
503 roots.

504 Previously, *Tri5* deletion was reported to lead to observable metabolic changes in *Fg*  
505 growing in rich medium, suggesting that DON might be linked to fungal physiology and



506 development (Chen et al. 2011). In line with this, we also found that several differentially  
507 regulated TF genes in  $\Delta$ Tri5 during root infection were putative development-associated  
508 regulatory genes (Suppl. data 15). For example, FG05\_08892 (MAT1-1-1) and FG05\_05151  
509 are known to be associated with sexual development (Kim et al., 2015), FG05\_01139  
510 (FgCBF1) is a predicted chromatin remodeling regulator (Guo et al., 2016), and  
511 FG05\_03597 is homologous to *Aspergillus nidulans* FibA, which is required for the control of  
512 mycelial proliferation and activation of asexual sporulation (Yu et al., 1996). However, when  
513 grown on MM, *Tri5* was barely expressed *in vitro*, and no DON could be detected by  
514 metabolic analysis (Fig. 6D).  $\Delta$ Tri5 also did not show any growth defects (Chen et al., 2011).  
515 Together, our results suggest that  $\Delta$ Tri5 may colonize the roots by utilizing a small set of  
516 genes not used by the WT fungus.

#### 517 **DON is produced during *Bd* root colonization but does not act as a virulence factor**

518 DON is a virulence factor during infection of wheat heads by *Fg* (Wang et al., 2020).  
519 However, it is unknown if this mycotoxin could also act as a virulence factor during infection  
520 of *Bd* roots. To determine this, the infection process was monitored using a *Fg* strain  
521 expressing Tri5-GFP fusion driving by the native *Tri5* gene promoter (Gardiner et al., 2009).  
522 Strong GFP signals could be visualized two days post-inoculation (dpi) in inoculated roots,  
523 indicating that the infection was progressing, and DON production was initiated (Fig. 7A and  
524 7B). Consistent with this observation, *Tri5* was highly induced at 2 dpi and remained at high  
525 levels at later time points (3, 5, and 7 dpi) in the WT isolate (Fig. 7C). Previously, a  
526 temporarily similar infection pattern by *Fg* was also observed in wheat seedling roots (Wang  
527 et al., 2015). *Fg* root infection of wheat triggers induction of systemic defense responses in  
528 above-ground parts of the plant (Wang et al., 2018). In addition, DON preferentially inhibits  
529 root growth in wheat, *Bd* and *Arabidopsis* plants (Gatti et al., 2019; Masuda et al., 2007;  
530 Pasquet et al., 2016), and has been proposed to act as a major virulence factor in the early  
531 stages of *Fg* root infection (Wang et al. 2018). To assess the role of DON during root  
532 infection, a *Fg Tri5* mutant was used in inoculation experiments together with WT and Tri5-



533 GFP strains. *Bd* roots infected by  $\Delta$ Tri5 exhibited levels of lesion development that were like  
534 those caused by WT and Tri5-GFP at 7 dpi (Fig. 7D). Therefore, while DON is a virulence  
535 factor in *Fg* during FHB of wheat and is highly induced in roots, *Bd* root infection by *Fg*  
536 seems to be independent of DON production. Indeed, various phytopathogenic phenotypes  
537 have been described for *Fg* DON deficient mutants (Boenisch and Schäfer, 2011; Cuzick et  
538 al., 2008; Jansen et al., 2005). For instance, altered levels of DON have been shown to  
539 inhibit plant apoptosis-like programmed cell death (PCD) induced by heat stress in  
540 *Arabidopsis* (Diamond et al., 2013).

#### 541 **Phytohormone dynamics during *Fg* colonization of *Bd* roots**

542 It is becoming increasingly evident that plant pathogens interfere with phytohormone  
543 pathways by producing plant hormones (Kazan and Lyons, 2014). However, pathogen-  
544 produced phytohormones have rarely been examined during root infections. We therefore  
545 next examined the transcriptome of *Fg* during *Bd* root infection, coupled with metabolic  
546 analyses, to determine putative phytohormone associated genes in *Fg* and their potential  
547 involvement in *Bd* root colonization.

#### 548 **JA produced by *Fg* is not associated with *Bd* root colonization**

549 The oxylipin hormone jasmonic acid and its derived metabolites collectively known as  
550 jasmonates (JAs) are derived from lipid peroxidation and can affect both host and fungal  
551 physiological processes (Tsitsigiannis and Keller, 2007). Fungal oxylipin biosynthesis is  
552 catalyzed by lipoxygenases (LOXs) (Fischer and Keller, 2016). In *F. oxysporum*, FoxLOX  
553 was found to exhibit a multifunctional activity in oxylipins production, thus proposed to  
554 possess a function in JA pathways (Brodhun et al., 2013). Interestingly, we noticed that the  
555 *Fg* homolog of FoxLOX, *FG05\_05046*, was expressed during *in vitro* growth, and highly  
556 induced during root infection (4.8 fold, Table S1). JA-regulated defenses in plants can be  
557 interrupted by pathogen-derived hormone analogs (Caarls et al., 2017; Patkar and Naqvi,  
558 2017). The *Fg* genome does not contain a homolog of the *M. oryzae antibiotic biosynthesis*

559 *monooxygenase (Abm)*, which converts host-derived JA into 12-hydroxyjasmonic acid  
560 (12OH-JA), thus attenuating rice blast disease resistance (Patkar and Naqvi, 2017). The  
561 *Arabidopsis* 2OG oxygenases (JOXs) are responsible for JA hydroxylation (Caarls et al.,  
562 2017; Smirnova et al., 2017). We identified ten homologous of *Arabidopsis* JOXs in *Fg*  
563 (Table S1). Of these, *FG05\_08081* and *FG05\_02301*, whose protein products share 22-26%  
564 identity to JOXs, were induced by 8.3 and 3.9 fold, respectively, during root infection.  
565 *FG05\_08081* is present in the butanolide biosynthesis gene cluster, members of which were  
566 also significantly upregulated during root infection (Suppl. data 2). However, whether  
567 *FG05\_08081* and *FG05\_02301* are involved in JA degradation requires further analyses.

568 JA-associated host defense against *Fg* has been studied during FHB development. Inhibition  
569 of JA by DON at the bottom of wheat florets promotes fungal progression through rachis  
570 nodes (Bönnighausen et al., 2019). Furthermore, late activation of JA signaling during FHB  
571 has been proposed to correlate with a necrotrophic transition of *Fg* (Ding et al., 2011). To  
572 determine if JA levels change during root infection, we quantified JA levels in *Bd* roots either  
573 mock-treated or inoculated with WT *Fg* or  $\Delta$ Tri5 strains by high performance liquid  
574 chromatography (HPLC). We found that 5 ng/mg dried material of JA was produced in *Fg*  
575 mycelia grown on MM (Fig. 6A). However, JA levels found in infected and control roots were  
576 much lower than 5 ng/mg and did not display any significant difference (Fig. 6A).  
577 Interestingly, however, higher levels of JA derivative methyl-JA (MeJA) were detectable in  
578 the roots infected by  $\Delta$ Tri5 than those infected by WT (Fig. 6B). Thus, DON seems to inhibit  
579 MeJA production in the infected *Bd* roots. This is consistent with the observation in wheat  
580 heads where MeJA levels in the  $\Delta$ Tri5-infected tissue were less than those infected with WT  
581 *Fg* (Bönnighausen et al., 2019).

## 582 **SA may synergistically interact with *Bd* root defense-related metabolic pathways**

583 SA is a major defense hormone typically associated with plant defense against biotrophic  
584 pathogens (Glazebrook, 2005). JA and SA accumulate at different basal levels in various  
585 wheat cultivars and antagonistically fine-tune host defense responses (Powell et al., 2017).

586 Therefore, we next focused on *Fg* responses to SA. Although the SA-pathway may be  
587 involved in host basal resistance against *Fg* (Ding et al., 2011; Makandar et al., 2010), SA-  
588 associated systemic acquired resistance (SAR) played no role in FHB resistance (Li and  
589 Yen, 2008). During infection of *Bd* seedlings by *Fp*, SA biosynthesis was induced (Powell et  
590 al., 2017). However, the function of SA during root infection by *Fg* remains elusive.

591 In *Arabidopsis*, SA biosynthesis during pathogen infection mainly relies on the intermediate  
592 chorismate processed by isochorismate synthase I (ICS1), the GH3 acyl adenylase-family  
593 enzyme PBS3, and the BAHD acyltransferase-family protein EPS1 (Torrens-Spence et al.,  
594 2019). The phenylalanine ammonia lyase (PAL) pathway also mediates SA synthesis  
595 through the conversion of benzoic acid or coumaric acid, but only contributes to a small  
596 portion of total SA production (Wildermuth et al., 2002). Similarly, some bacteria can directly  
597 convert isochorismate to SA by isochorismate pyruvate lyase (IPL) (Serino et al., 1995).  
598 While the host is believed to be the source of SA production in various plant-bacteria  
599 interactions, whether there is a fungal origin of SA remains unknown. In the *Fg* genome, we  
600 found two ICS1 homologs FG05\_05195 and FG05\_12934. Of these, *FG05\_05195* was lowly  
601 expressed (FPKM < 0.5), but *FG05\_12934* exhibited constitutive and high transcript levels  
602 during both *in vitro* growth and infection of *Bd* roots (Table S1). *Fg* also has an *EPS1*  
603 homolog, *FG05\_00237*, which was significantly upregulated during *Bd* root infection (Table  
604 S1). *FG05\_09331* encodes a protein sharing about 50% identity with PAL. *FG05\_09331*  
605 expression decreased by 2.2-fold in infected roots relative to *Fg* grown *in vitro*. No PBS3 and  
606 IPL homologs could be identified in *Fg*. While expression patterns of *ICS1* and *EPS1*  
607 homologs may coincide with observed SA production by *Fg*, the absence of a *PBS3*  
608 homolog indicates other components or pathways could be involved in the SA biosynthesis.  
609 To determine if SA is produced in *Fg-Bd* interactions, we extracted metabolites from *Bd*  
610 roots with or without *Fg* inoculation and quantified SA levels by HPLC. In *Fg* mycelia, there  
611 was also about 0.01 µg SA per mg dry material (Fig. 6C). Most SA was found in the roots  
612 inoculated with WT *Fg*, followed by uninfected roots and the lowest levels in the  $\Delta$ Tri5

613 infected roots (Fig. 6C), indicating a potential role for DON in regulating SA levels during root  
614 infection by *Fg* although it is difficult to estimate the exact contribution of *Bd* or *Fg* to the SA  
615 levels measured.

616 SA has a direct effect on *Fg* growth, most likely associated with active degradation of SA by  
617 fungal hydroxylases. In recent studies (Hao et al., 2019; Qi et al., 2019; Rocheleau et al.,  
618 2019), two proteins FGSG\_08116 and FGSG\_03657 have been characterized with a  
619 function in SA degradation. While transcription of both FGSG\_08116 and FGSG\_03657 can  
620 be induced by external SA, fungal virulence in wheat heads was only influenced by deletion  
621 of the former. The function of FGSG\_03657 for SA degradation was not disabled in deletion  
622 mutants. Interestingly, *FG05\_03657* (a.k.a. FGSG\_03657) was exclusively induced during  
623 *Bd* root infection (Suppl. data 10), suggesting that it may have a role in regulating SA levels  
624 in infected roots.

625 To determine if *Fg* could possess additional putative SA hydroxylase genes (Hao et al.,  
626 2019), we searched the *Fg* genome and identified 28 homologs of the SA sensor and  
627 degradation protein Shy1 from *Ustilago maydis* with FgShyC displaying at least 20% identity  
628 to Shy1 (e-value < 10<sup>-5</sup>) (Fig. S3). This similarity is much higher than the values reported  
629 previously (Hao et al., 2019; Rabe et al., 2013), where the expansion of these putative  
630 proteins in *Fg* was supported by phylogenetic analysis (Fig. 8A). In our current transcriptome,  
631 *FG05\_03657* and additional ten genes encoding putative SA hydroxylases were significantly  
632 upregulated in *Fg* during root infection (Fig. 8B). Therefore, SA biosynthesis by the pathogen  
633 as well as the host can contribute to the expression and regulation of these genes.

#### 634 **Expression of genes involved in the biosynthesis of other phytohormones in *Fg*** 635 **during *Bd* roots infection**

636 In addition to JA and SA, other phytohormones such as gibberellins (GAs), auxins (IAAs),  
637 ethylene (ET), cytokinins (CKs) and abscisic acid (ABA) also participate in modulating host  
638 defense signaling (Pieterse et al., 2012). GAs can be synthesized by a number of *Fusarium*

639 species but not by *Fg* due to the lack of a corresponding biosynthesis gene cluster (Cuomo  
640 et al., 2007). As a virulence factor, GA is restricted to the necrotrophic fungal pathogen *F.*  
641 *fujikuroi* (Wiemann et al., 2013) and is possibly involved in attenuating host JA signaling  
642 (Navarro et al., 2008). Under our inoculation conditions, GA was detected in the roots  
643 infected by WT *Fg* but not by the  $\Delta$ Tri5 mutant (Fig. 6F), indicating an endogenous GA  
644 production in *Bd* roots upon *Fg* infection and a potential positive effect of DON on root GA  
645 production. Similarly, GA accumulates in wheat heads infected by *Fg* (Bönnighausen et al.,  
646 2019), thus *Fg* seems to trigger a GA-dependent response in host roots that is similar to one  
647 observed in wheat florets (Buhrow et al., 2016). However, the association between DON  
648 and GA production requires further investigations.

649 Fungal genes encoding indole-3-acetaldehyde dehydrogenases (*lad*) and tryptophan  
650 aminotransferases (*laaM*) were thought to be responsible for IAA production (Reineke et al.,  
651 2008). A possible third pathway for auxin biosynthesis could be mediated by *Fg* genes  
652 homologous to *YUCCA*, a key enzyme involved in plant auxin biosynthesis (Mano and  
653 Nemoto, 2012). Interestingly, only one of the three *Fg lad* gene homologs, *FG05\_02773*,  
654 showed more than 4-fold induction in *Fg* during root infection as compared to *Fg* grown *in*  
655 *vitro* (Table S1). In contrast, two *laaM* homologs and a *YUCCA* homolog were significantly  
656 downregulated in *Fg* inoculated roots (Table S1). Thus, the strong induction of *FG05\_02773*  
657 might coincide with the production of the auxin indole-3-acetic acid (IAA) by *Fg*, which could  
658 thereafter compromise the host auxin pathway. Fungal auxin biosynthesis plays a role in  
659 pathogenicity of several pathogens (Chanclud and Morel, 2016). In *Fg*, auxin was proposed  
660 to be a virulence factor (Svoboda et al., 2019). Indeed, *Fg* is able to synthesize IAA but also  
661 sensitive to exogenous application of IAA and its biosynthetic intermediates (Qi et al., 2016).  
662 However, *Fg* infection strongly inhibited IAA levels in roots infected by *Fg* WT or  $\Delta$ Tri5 (Fig.  
663 6E). This is contradictory to the findings in wheat where auxin levels increased during FHB  
664 (Wang et al., 2018). Factors such as host tissue types and hormone antagonists (Kazan and  
665 Manners, 2009) might be responsible for such differences.

666 *Fg* can exploit host ET signaling during colonization of both dicotyledonous and  
667 monocotyledonous plants and is believed to be capable of producing ET to counteract host  
668 defense pathways (Chen et al., 2009). However, rather than ET forming enzymes (EFE), *Fg*  
669 was thought to use pathways incorporating 1-aminocyclopropane carboxylic acids (ACC) as  
670 precursors for ET biosynthesis (Svoboda et al., 2019). Although an enzymatic function for  
671 two of the five ACC enzymes encoded by the *Fg* genome could be confirmed, fungal  
672 mutants for these genes showed no defect in pathogenicity on wheat (Svoboda et al., 2019).  
673 We looked at the expression of all these five genes, including the three annotated ACC  
674 synthase genes, *FG05\_05184* (*ACS1*), *FG05\_07606* (*ACS2*), *FG05\_13587* (*ACS3*), and two  
675 ACC deaminase (*ACD*) genes, *FG05\_02678* and *FG05\_12669*, but found no differential  
676 expression during *Bd* root infections (Table S1), suggesting that pathogen produced ET may  
677 not be involved in root infection.

678 Biosynthesis of fungal cytokinins, which can be mediated by either one or both of the fungal  
679 transfer RNA-isopentenyl transferases (tRNA-IPT) and the Lonely Guy (LOG) enzyme, is  
680 associated with host immunity and nutrient modulation and maintenance of hemi-biotrophic  
681 lifestyles during infection (Spallek et al., 2018). Unlike many other *Fusarium* species, the *Fg*  
682 genome contains only one tRNA-IPT gene homolog (*FG05\_09015*) (Sørensen et al., 2018).  
683 This gene was not differentially regulated (Table S1) and only moderately expressed (FPKM  
684 < 10) during both root infections and *in vitro* growth on MM.

685 Exogenous ABA has no effects on disease development, *Fg* toxin production or defense  
686 hormone levels in *Fg*-challenged wheat heads, but can promote fungal hydrolase and  
687 cytoskeletal reorganization genes induced early during infection and increase wheat's  
688 susceptibility to FHB (Buhrow et al., 2016). The elucidation of fungal genes responsible for  
689 ABA production in the necrotrophic pathogen *Botrytis cinerea* and a few others has led to the  
690 hypothesis that a conserved ABA biosynthesis pathway exists in fungi (Lievens et al., 2017).  
691 In *B. cinerea*, such pathway involves four clustered genes *BcABA1-4* and a sesquiterpene  
692 cyclase gene *BcSTC5* (Izquierdo-Bueno et al., 2018). Fungal ABA was shown to act as a

693 virulence factor in *M. oryzae*, which also harbors a direct ABA biosynthesis pathway but  
694 lacks a BsABA3 ortholog (Spence et al., 2015). Similar to *M. oryzae*, we could identify  
695 homologs of only BcABA1, 2 and 4 by BLASTp in *Fg*. In the current root transcriptome, none  
696 of these genes was differentially regulated (Table S1). Overall, while fungal GAs and IAAs  
697 might be associated with *Fg* root infections, it is unlikely that ETs, CKs and ABAs are  
698 involved in *Bd* root infection by *Fg*.

## 699 **Conclusions**

700 The results presented here provide a detailed overview of root infection strategies employed  
701 by *Fg*, an important cereal fungal pathogen. The transcriptional regulation of pathogen  
702 metabolic pathways, virulence factors and signalling events during root infection show both  
703 unique and common features to those employed by *Fg* when infecting above-ground tissues.  
704 The mycotoxin DON, although not required for fungal virulence, produced during root  
705 infection appears to broadly affect various fungal processes and interplay with host  
706 responses. Expressions of several fungal stress and defence genes might help the pathogen  
707 to effectively deal with plant defence responses. In line with this, fungal JA, IAA and, in  
708 particular SA, seem to be used to interfere with root defenses. The findings presented in this  
709 paper will be useful for dissecting the mechanism of *Fg* belowground lifestyle and the  
710 development of novel plant protection strategies.

## 711 **Acknowledgements**

712 We thank Di Xiao and Dr. Jonathan Powell for technical assistance. Yi Ding was the  
713 recipient of a post-doctoral fellowship from the Commonwealth Scientific and Industrial  
714 Research Organization Research Office.

## 715 **Conflict of interest**

716 All authors declared no conflict of interest.

## 717 **References**



- 718 Abou Ammar, G., Tryono, R., Döll, K., Karlovsky, P., Deising, H.B., Wirsal, S.G.R., 2013.  
719 Identification of ABC Transporter Genes of *Fusarium graminearum* with Roles in Azole  
720 Tolerance and/or Virulence. *PLoS One* 8, e79042.  
721 <https://doi.org/10.1371/journal.pone.0079042>
- 722 Audenaert, K., Vanheule, A., Höfte, M., Haesaert, G., 2013. Deoxynivalenol: A major player  
723 in the multifaceted response of *Fusarium* to its environment. *Toxins (Basel)*. 6, 1–19.  
724 <https://doi.org/10.3390/toxins6010001>
- 725 Bhandari, D.R., Wang, Q., Li, B., Friedt, W., Römpf, A., Spengler, B., Gottwald, S., 2018.  
726 Histology-guided high-resolution AP-SMALDI mass spectrometry imaging of wheat-  
727 *Fusarium graminearum* interaction at the root-shoot junction. *Plant Methods* 14, 1–13.  
728 <https://doi.org/10.1186/s13007-018-0368-6>
- 729 Bhuiyan, N.H., Selvaraj, G., Wei, Y., King, J., 2009. Role of lignification in plant defense.  
730 *Plant Signal. Behav.* 4, 158–159. <https://doi.org/10.4161/psb.4.2.7688>
- 731 Boedi, S., Berger, H., Sieber, C., Münsterkötter, M., Maluku, I., Warth, B., Sulyok, M.,  
732 Lemmens, M., Schuhmacher, R., Güldener, U., Strauss, J., 2016. Comparison of  
733 *Fusarium graminearum* transcriptomes on living or dead wheat differentiates substrate-  
734 responsive and defense-responsive genes. *Front. Microbiol.* 7, 1–24.  
735 <https://doi.org/10.3389/fmicb.2016.01113>
- 736 Boenisch, M.J., Schäfer, W., 2011. *Fusarium graminearum* forms mycotoxin producing  
737 infection structures on wheat. *BMC Plant Biol.* 11, 110. [https://doi.org/10.1186/1471-](https://doi.org/10.1186/1471-2229-11-110)  
738 [2229-11-110](https://doi.org/10.1186/1471-2229-11-110)
- 739 Bönninghausen, J., Schauer, N., Schäfer, W., Bormann, J., 2019. Metabolic profiling of wheat  
740 rachis node infection by *Fusarium graminearum* – decoding deoxynivalenol-dependent  
741 susceptibility. *New Phytol.* 221, 459–469. <https://doi.org/10.1111/nph.15377>
- 742 Brauer, E.K., Balcerzak, M., Rocheleau, H., Leung, W., Schernthaner, J., Subramaniam, R.,



- 743 Ouellet, T., 2020. Genome Editing of a Deoxynivalenol-Induced Transcription Factor  
744 Confers Resistance to *Fusarium graminearum* in Wheat. *Mol. Plant-Microbe Interact.*  
745 33, 553–560. <https://doi.org/10.1094/MPMI-11-19-0332-R>
- 746 Brodhun, F., Cristobal-Sarramian, A., Zabel, S., Newie, J., Hamberg, M., Feussner, I., 2013.  
747 An Iron 13S-Lipoxygenase with an  $\alpha$ -Linolenic Acid Specific Hydroperoxidase Activity  
748 from *Fusarium oxysporum*. *PLoS One* 8. <https://doi.org/10.1371/journal.pone.0064919>
- 749 Brown, N.A., Antoniw, J., Hammond-Kosack, K.E., 2012. The predicted secretome of the  
750 plant pathogenic fungus *Fusarium graminearum*: A refined comparative analysis. *PLoS*  
751 *One* 7. <https://doi.org/10.1371/journal.pone.0033731>
- 752 Brown, N.A., Evans, J., Mead, A., Hammond-Kosack, K.E., 2017. A spatial temporal analysis  
753 of the *Fusarium graminearum* transcriptome during symptomless and symptomatic  
754 wheat infection. *Mol. Plant Pathol.* 18, 1295–1312. <https://doi.org/10.1111/mpp.12564>
- 755 Buhrow, L.M., Cram, D., Tulpan, D., Foroud, N.A., Loewen, M.C., 2016. Exogenous abscisic  
756 acid and gibberellic acid elicit opposing effects on *Fusarium graminearum* infection in  
757 wheat. *Phytopathology* 106, 986–996. <https://doi.org/10.1094/PHYTO-01-16-0033-R>
- 758 Caarls, L., Elberse, J., Awwanah, M., Ludwig, N.R., De Vries, M., Zeilmaker, T., Van Wees,  
759 S.C.M., Schuurink, R.C., Van den Ackerveken, G., 2017. Arabidopsis JASMONATE-  
760 INDUCED OXYGENASES down-regulate plant immunity by hydroxylation and  
761 inactivation of the hormone jasmonic acid. *Proc. Natl. Acad. Sci. U. S. A.* 114, 6388–  
762 6393. <https://doi.org/10.1073/pnas.1701101114>
- 763 Chanclud, E., Morel, J.-B., 2016. Plant hormones: a fungal point of view. *Mol. Plant Pathol.*  
764 17, 1289–1297. <https://doi.org/10.1111/mpp.12393>
- 765 Chen, F., Zhang, J., Song, X., Yang, J., Li, H., Tang, H., Liao, Y.C., 2011. Combined  
766 metabonomic and quantitative real-time PCR analyses reveal systems metabolic  
767 changes of *Fusarium graminearum* induced by Tri5 gene deletion. *J. Proteome Res.* 10,

- 768 2273–2285. <https://doi.org/10.1021/pr101095t>
- 769 Chen, X., Steed, A., Travella, S., Keller, B., Nicholson, P., 2009. *Fusarium graminearum*  
770 exploits ethylene signalling to colonize dicotyledonous and monocotyledonous plants.  
771 *New Phytol.* 182, 975–983. <https://doi.org/10.1111/j.1469-8137.2009.02821.x>
- 772 Chen, Y., Kistler, H.C., Ma, Z., 2019. *Fusarium graminearum* Trichothecene Mycotoxins:  
773 Biosynthesis, Regulation, and Management . *Annu. Rev. Phytopathol.* 57, 1–25.  
774 <https://doi.org/10.1146/annurev-phyto-082718-100318>
- 775 Coleman, J.J., Mylonakis, E., 2009. Efflux in fungi: La pièce de résistance. *PLoS Pathog.* 5.  
776 <https://doi.org/10.1371/journal.ppat.1000486>
- 777 Cuzick, A., Urban, M., Hammond-Kosack, K., 2008. *Fusarium graminearum* gene deletion  
778 mutants *map1* and *tri5* reveal similarities and differences in the pathogenicity  
779 requirements to cause disease on *Arabidopsis* and wheat floral tissue. *New Phytol.* 177,  
780 990–1000. <https://doi.org/10.1111/j.1469-8137.2007.02333.x>
- 781 De Jonge, R., Esse, H.P. Van, Kombrink, A., Shinya, T., Desaki, Y., Bours, R., Krol, S. Van  
782 Der, Shibuya, N., Joosten, M.H. a J., Thomma, B.P.H.J., 2010. Immunity in Plants.  
783 *Science* (80-. ). 329, 953–955. <https://doi.org/10.1126/science.1190859>
- 784 Desmond, O.J., Manners, J.M., Stephens, A.E., Maclean, D.J., Schenk, P.M., Gardiner,  
785 D.M., Munn, A.L., Kazan, K., 2008. The *Fusarium* mycotoxin deoxynivalenol elicits  
786 hydrogen peroxide production, programmed cell death and defence responses in wheat.  
787 *Mol. Plant Pathol.* 9, 435–445. <https://doi.org/10.1111/j.1364-3703.2008.00475.x>
- 788 Diamond, M., Reape, T.J., Rocha, O., Doyle, S.M., Kacprzyk, J., Doohan, F.M., McCabe,  
789 P.F., 2013. The *Fusarium* Mycotoxin Deoxynivalenol Can Inhibit Plant Apoptosis-Like  
790 Programmed Cell Death. *PLoS One* 8. <https://doi.org/10.1371/journal.pone.0069542>
- 791 Ding, L., Xu, H., Yi, H., Yang, L., Kong, Z., Zhang, L., Xue, S., Jia, H., Ma, Z., 2011.  
792 Resistance to hemi-biotrophic *f. graminearum* infection is associated with coordinated

- 793 and ordered expression of diverse defense signaling pathways. PLoS One 6.  
794 <https://doi.org/10.1371/journal.pone.0019008>
- 795 Ding, Y., Gardiner, D.M., Xiao, D., Kazan, K., 2020. Regulators of nitric oxide signaling  
796 triggered by host perception in a plant pathogen. Proc. Natl. Acad. Sci. 201918977.  
797 <https://doi.org/10.1073/pnas.1918977117>
- 798 Divon, H.H., Fluhr, R., 2007. Nutrition acquisition strategies during fungal infection of plants.  
799 FEMS Microbiol. Lett. 266, 65–74. <https://doi.org/10.1111/j.1574-6968.2006.00504.x>
- 800 Dutartre, L., Hilliou, F., Feyereisen, R., 2012. Phylogenomics of the benzoxazinoid  
801 biosynthetic pathway of Poaceae: Gene duplications and origin of the Bx cluster. BMC  
802 Evol. Biol. 12. <https://doi.org/10.1186/1471-2148-12-64>
- 803 Fischer, G.J., Keller, N.P., 2016. Production of cross-kingdom oxylipins by pathogenic fungi:  
804 An update on their role in development and pathogenicity. J. Microbiol. 54, 254–264.  
805 <https://doi.org/10.1007/s12275-016-5620-z>
- 806 Fitzgerald, T.L., Powell, J.J., Schneebeli, K., Hsia, M.M., Gardiner, D.M., Bragg, J.N.,  
807 McIntyre, C.L., Manners, J.M., Ayliffe, M., Watt, M., Vogel, J.P., Henry, R.J., Kazan, K.,  
808 2015. Brachypodium as an emerging model for cereal–pathogen interactions. Ann. Bot.  
809 115, 717–731. <https://doi.org/10.1093/aob/mcv010>
- 810 Foroud, N.A., Pordel, R., Goyal, R.K., Ryabova, D., Eranthodi, A., Chatterton, S., Kovalchuk,  
811 I., 2019. Chemical Activation of the Ethylene Signaling Pathway Promotes Fusarium  
812 graminearum Resistance in Detached Wheat Heads. Phytopathology 109, 796–803.  
813 <https://doi.org/10.1094/PHTO-08-18-0286-R>
- 814 Gardiner, D.M., Benfield, A.H., Stiller, J., Stephen, S., Aitken, K., Liu, C., Kazan, K., 2018. A  
815 high-resolution genetic map of the cereal crown rot pathogen Fusarium  
816 pseudograminearum provides a near-complete genome assembly. Mol. Plant Pathol.  
817 19, 217–226. <https://doi.org/10.1111/mpp.12519>

- 818 Gardiner, D.M., Kazan, K., Manners, J.M., 2009. Nutrient profiling reveals potent inducers of  
819 trichothecene biosynthesis in *Fusarium graminearum*. *Fungal Genet. Biol.* 46, 604–613.  
820 <https://doi.org/10.1016/j.fgb.2009.04.004>
- 821 Gardiner, D.M., Kazan, K., Praud, S., Torney, F.J., Rusu, A., Manners, J.M., 2010. Early  
822 activation of wheat polyamine biosynthesis during *Fusarium* head blight implicates  
823 putrescine as an inducer of trichothecene mycotoxin production. *BMC Plant Biol.* 10,  
824 289. <https://doi.org/10.1186/1471-2229-10-289>
- 825 Gardiner, D.M., Stephens, A.E., Munn, A.L., Manners, J.M., 2013. An ABC pleiotropic drug  
826 resistance transporter of *fusarium graminearum* with a role in crown and root diseases  
827 of wheat. *FEMS Microbiol. Lett.* 348, 36–45. <https://doi.org/10.1111/1574-6968.12240>
- 828 Gardiner, D.M., Stiller, J., Kazan, K., 2014. Genome sequence of *Fusarium graminearum*  
829 isolate CS3005. *Genome Announc.* 2, e00227-14-e00227-14.  
830 <https://doi.org/10.1128/genomeA.00227-14>
- 831 Gatti, M., Cambon, F., Tassy, C., Macadre, C., Guerard, F., Langin, T., Dufresne, M., 2019.  
832 The *Brachypodium distachyon* UGT Bradi5gUGT03300 confers type II fusarium head  
833 blight resistance in wheat. *Plant Pathol.* 68, 334–343. <https://doi.org/10.1111/ppa.12941>
- 834 Gatti, M., Cambon, F., Tassy, C., Macadre, C., Guerard, F., Langin, T., Dufresne, M., 2018.  
835 The *Brachypodium distachyon* UGT Bradi5gUGT03300 confers type II Fusarium Head  
836 Blight resistance in wheat. *Plant Pathol.* <https://doi.org/10.1111/ppa.12941>
- 837 Glazebrook, J., 2005. Contrasting Mechanisms of Defense Against Biotrophic and  
838 Necrotrophic Pathogens. *Annu. Rev. Phytopathol.* 43, 205–227.  
839 <https://doi.org/10.1146/annurev.phyto.43.040204.135923>
- 840 Götz, S., García-Gómez, J.M., Terol, J., Williams, T.D., Nagaraj, S.H., Nueda, M.J., Robles,  
841 M., Talón, M., Dopazo, J., Conesa, A., 2008. High-throughput functional annotation and  
842 data mining with the Blast2GO suite. *Nucleic Acids Res.*

- 843 <https://doi.org/10.1093/nar/gkn176>
- 844 Güldener, U., Mannhaupt, G., Münsterkötter, M., Haase, D., Oesterheld, M., Stümpflen, V.,  
845 Mewes, H.-W., Adam, G., 2006. FGDB: a comprehensive fungal genome resource on  
846 the plant pathogen *Fusarium graminearum*. *Nucleic Acids Res.* 34, D456-8.  
847 <https://doi.org/10.1093/nar/gkj026>
- 848 Guo, L., Breakspear, A., Zhao, G., Gao, L., Kistler, H.C., Xu, J.R., Ma, L.J., 2016.  
849 Conservation and divergence of the cyclic adenosine monophosphate-protein kinase A  
850 (cAMP-PKA) pathway in two plant-pathogenic fungi: *Fusarium graminearum* and  
851 *F.verticillioides*. *Mol. Plant Pathol.* 17, 196–209. <https://doi.org/10.1111/mpp.12272>
- 852 Hao, G., Naumann, T.A., Vaughan, M.M., McCormick, S., Usgaard, T., Kelly, A., Ward, T.J.,  
853 2019. Characterization of a *Fusarium graminearum* salicylate hydroxylase. *Front.*  
854 *Microbiol.* 10, 1–11. <https://doi.org/10.3389/fmicb.2018.03219>
- 855 Harris, L.J., Balcerzak, M., Johnston, A., Schneiderman, D., Ouellet, T., 2016. Host-  
856 preferential *Fusarium graminearum* gene expression during infection of wheat, barley,  
857 and maize. *Fungal Biol.* 120, 111–123. <https://doi.org/10.1016/j.funbio.2015.10.010>
- 858 Hart, T., Komori, H.K., LaMere, S., Podshivalova, K., Salomon, D.R., 2013. Finding the  
859 active genes in deep RNA-seq gene expression studies. *BMC Genomics* 14.  
860 <https://doi.org/10.1186/1471-2164-14-778>
- 861 Hellin, P., King, R., Urban, M., Hammond-Kosack, K.E., Legrève, A., 2018. The adaptation  
862 of *Fusarium culmorum* to DMI fungicides is mediated by major transcriptome  
863 modifications in response to azole fungicide, including the overexpression of a PDR  
864 transporter (FcABC1). *Front. Microbiol.* 9, 1–15.  
865 <https://doi.org/10.3389/fmicb.2018.01385>
- 866 Henkes, G.J., Jousset, A., Bonkowski, M., Thorpe, M.R., Scheu, S., Lanoue, A., Schurr, U.,  
867 Röse, U.S.R., 2011. *Pseudomonas fluorescens* CHA0 maintains carbon delivery to

- 868 Fusarium graminearum-infected roots and prevents reduction in biomass of barley  
869 shoots through systemic interactions. J. Exp. Bot. 62, 4337–4344.  
870 <https://doi.org/10.1093/jxb/err149>
- 871 Hohn, T.M., Beremand, P.D., 1989. Isolation and nucleotide sequence of a sesquiterpene  
872 cyclase gene from the trichothecene-producing fungus *Fusarium sporotrichioides*. Gene  
873 79, 131–138. [https://doi.org/10.1016/0378-1119\(89\)90098-X](https://doi.org/10.1016/0378-1119(89)90098-X)
- 874 Izquierdo-Bueno, I., González-Rodríguez, V.E., Simon, A., Dalmais, B., Pradier, J.M., Le  
875 Pêcheur, P., Mercier, A., Walker, A.S., Garrido, C., Collado, I.G., Viaud, M., 2018.  
876 Biosynthesis of abscisic acid in fungi: identification of a sesquiterpene cyclase as the  
877 key enzyme in *Botrytis cinerea*. Environ. Microbiol. 20, 2469–2482.  
878 <https://doi.org/10.1111/1462-2920.14258>
- 879 Jansen, C., von Wettstein, D., Schäfer, W., Kogel, K.-H., Felk, A., Maier, F.J., 2005. Infection  
880 patterns in barley and wheat spikes inoculated with wild-type and trichodiene synthase  
881 gene disrupted *Fusarium graminearum*. Proc. Natl. Acad. Sci. U. S. A. 102, 16892–7.  
882 <https://doi.org/10.1073/pnas.0508467102>
- 883 Jashni, M.K., Dols, I.H.M., Iida, Y., Boeren, S., Beenen, H.G., Mehrabi, R., 2015. Synergistic  
884 Action of a Metalloprotease and a Serine Protease from *Fusarium oxysporum* f. sp.  
885 *lycopersici* Cleaves Chitin-Binding Tomato Chitinases, Reduces Their Antifungal  
886 Activity, and Enhances Fungal Virulence 28, 996–1008.
- 887 Kazan, K., Gardiner, D.M., 2018a. Transcriptomics of cereal–*Fusarium graminearum*  
888 interactions: what we have learned so far. Mol. Plant Pathol. 19, 764–778.  
889 <https://doi.org/10.1111/mpp.12561>
- 890 Kazan, K., Gardiner, D.M., 2018b. *Fusarium* crown rot caused by *Fusarium*  
891 *pseudograminearum* in cereal crops: recent progress and future prospects. Mol. Plant  
892 Pathol. 19, 1547–1562. <https://doi.org/10.1111/mpp.12639>

- 893 Kazan, K., Lyons, R., 2014. Intervention of Phytohormone Pathways by Pathogen Effectors.  
894 Plant Cell 26, 2285–2309. <https://doi.org/10.1105/tpc.114.125419>
- 895 Kazan, K., Manners, J.M., 2009. Linking development to defense: auxin in plant-pathogen  
896 interactions. Trends Plant Sci. 14, 373–382.  
897 <https://doi.org/10.1016/j.tplants.2009.04.005>
- 898 Khan, N.U., Liu, M., Yang, X., Qiu, D., 2016. Fungal elicitor MoHrip2 induces disease  
899 resistance in rice leaves, triggering stress-related pathways. PLoS One 11, 1–14.  
900 <https://doi.org/10.1371/journal.pone.0158112>
- 901 Kim, H.-K., Jo, S.-M., Kim, G.-Y., Kim, D.-W., Kim, Y.-K., Yun, S.-H., 2015. A Large-Scale  
902 Functional Analysis of Putative Target Genes of Mating-Type Loci Provides Insight into  
903 the Regulation of Sexual Development of the Cereal Pathogen *Fusarium graminearum*.  
904 PLoS Genet. 11, e1005486. <https://doi.org/10.1371/journal.pgen.1005486>
- 905 Lanoue, A., Burlat, V., Henkes, G.J., Koch, I., Schurr, U., Röse, U.S.R., 2010. De novo  
906 biosynthesis of defense root exudates in response to *Fusarium* attack in barley. New  
907 Phytol. 185, 577–588. <https://doi.org/10.1111/j.1469-8137.2009.03066.x>
- 908 Larochelle, M., Drouin, S., Robert, F., Turcotte, B., 2006. Oxidative Stress-Activated Zinc  
909 Cluster Protein Stb5 Has Dual Activator/Repressor Functions Required for Pentose  
910 Phosphate Pathway Regulation and NADPH Production. Mol. Cell. Biol. 26, 6690–6701.  
911 <https://doi.org/10.1128/mcb.02450-05>
- 912 Lee, J., Son, H., Lee, S., Park, A.R., Lee, Y.W., 2010. Development of a conditional gene  
913 expression system using a zearalenone-inducible promoter for the ascomycete fungus  
914 *gibberella zeae*. Appl. Environ. Microbiol. 76, 3089–3096.  
915 <https://doi.org/10.1128/AEM.02999-09>
- 916 Li, G., Yen, Y., 2008. Jasmonate and ethylene signaling pathway may mediate *Fusarium*  
917 head blight resistance in wheat. Crop Sci. 48, 1888–1896.

- 918 <https://doi.org/10.2135/cropsci2008.02.0097>
- 919 Liang, Y., Cui, S., Tang, X., Zhang, Y., Qiu, D., Zeng, H., Guo, L., Yuan, J., Yang, X., 2018.  
920 An Asparagine-Rich Protein Nbnrp1 Modulate *Verticillium dahliae* Protein PevD1-  
921 Induced Cell Death and Disease Resistance in *Nicotiana benthamiana*. *Front. Plant Sci.*  
922 9, 303. <https://doi.org/10.3389/fpls.2018.00303>
- 923 Lievens, L., Pollier, J., Goossens, A., Beyaert, R., Staal, J., 2017. Abscisic acid as pathogen  
924 effector and immune regulator. *Front. Plant Sci.* 8, 1–15.  
925 <https://doi.org/10.3389/fpls.2017.00587>
- 926 Lindo, L., McCormick, S.P., Cardoza, R.E., Brown, D.W., Kim, H.S., Alexander, N.J., Proctor,  
927 R.H., Gutiérrez, S., 2018. Effect of deletion of a trichothecene toxin regulatory gene on  
928 the secondary metabolism transcriptome of the saprotrophic fungus *Trichoderma*  
929 *arundinaceum*. *Fungal Genet. Biol.* 119, 29–46.  
930 <https://doi.org/10.1016/j.fgb.2018.08.002>
- 931 Lindo, L., McCormick, S.P., Cardoza, R.E., Kim, H.S., Brown, D.W., Alexander, N.J., Proctor,  
932 R.H., Gutiérrez, S., 2019. Role of *Trichoderma arundinaceum* tri10 in regulation of  
933 terpene biosynthetic genes and in control of metabolic flux. *Fungal Genet. Biol.* 122,  
934 31–46. <https://doi.org/10.1016/j.fgb.2018.11.001>
- 935 Liu, T., Song, T., Zhang, X., Yuan, H., Su, L., Li, W., Xu, J., Liu, S., Chen, L., Chen, T.,  
936 Zhang, M., Gu, L., Zhang, B., Dou, D., 2014. Unconventionally secreted effectors of two  
937 filamentous pathogens target plant salicylate biosynthesis. *Nat. Commun.* 5.  
938 <https://doi.org/10.1038/ncomms5686>
- 939 Lo Presti, L., Lanver, D., Schweizer, G., Tanaka, S., Liang, L., Tollot, M., Zuccaro, A.,  
940 Reissmann, S., Kahmann, R., 2015. Fungal Effectors and Plant Susceptibility. *Annu.*  
941 *Rev. Plant Biol.* 66, 513–545. <https://doi.org/10.1146/annurev-arplant-043014-114623>
- 942 Lu, S., Edwards, M.C., 2016. Genome-Wide Analysis of Small Secreted Cysteine-Rich



- 943 Proteins Identifies Candidate Effector Proteins Potentially Involved in *Fusarium*  
944 *graminearum*-Wheat Interactions. *Phytopathology* 106, 166–176.  
945 <https://doi.org/10.1094/PHYTO-09-15-0215-R>
- 946 Luo, K., Rocheleau, H., Qi, P.F., Zheng, Y.L., Zhao, H.Y., Ouellet, T., 2016. Indole-3-acetic  
947 acid in *Fusarium graminearum*: Identification of biosynthetic pathways and  
948 characterization of physiological effects. *Fungal Biol.* 120, 1135–1145.  
949 <https://doi.org/10.1016/j.funbio.2016.06.002>
- 950 Lyons, R., Stiller, J., Powell, J., Rusu, A., Manners, J.M., Kazan, K., 2015. *Fusarium*  
951 *oxysporum* triggers tissue-specific transcriptional reprogramming in *Arabidopsis*  
952 *thaliana*. *PLoS One* 10, 1–23. <https://doi.org/10.1371/journal.pone.0121902>
- 953 Lysøe, E., Seong, K., Kistler, H.C., 2011. The Transcriptome of *Fusarium graminearum*  
954 During the Infection of Wheat. *Mol. Plant-Microbe Interact.* 24, 995–1000.  
955 <https://doi.org/10.1094/MPMI-02-11-0038>
- 956 Ma, L.-J., Geiser, D.M., Proctor, R.H., Rooney, A.P., O'Donnell, K., Trail, F., Gardiner, D.M.,  
957 Manners, J.M., Kazan, K., 2013. *Fusarium* Pathogenomics. *Annu. Rev. Microbiol.* 67,  
958 399–416. <https://doi.org/10.1146/annurev-micro-092412-155650>
- 959 Makandar, R., Nalam, V., Chaturvedi, R., Jeannotte, R., Sparks, A.A., Shah, J., 2010.  
960 Involvement of Salicylate and Jasmonate Signaling Pathways in *Arabidopsis* Interaction  
961 with *Fusarium graminearum*. *Mol. Plant-Microbe Interact.* 23, 861–870.  
962 <https://doi.org/10.1094/MPMI-23-7-0861>
- 963 Malz, S., Grell, M.N., Thrane, C., Maier, F.J., Rosager, P., Felk, A., Albertsen, K.S., Salomon,  
964 S., Bohn, L., Schäfer, W., Giese, H., 2005. Identification of a gene cluster responsible  
965 for the biosynthesis of aurofusarin in the *Fusarium graminearum* species complex.  
966 *Fungal Genet. Biol.* 42, 420–433. <https://doi.org/10.1016/j.fgb.2005.01.010>
- 967 Mano, Y., Nemoto, K., 2012. The pathway of auxin biosynthesis in plants. *J. Exp. Bot.* 63,

- 968 2853–2872. <https://doi.org/10.1093/jxb/ers091>
- 969 Marcel, S., Sawers, R., Oakeley, E., Angliker, H., Paszkowski, U., 2010. Tissue-Adapted  
970 Invasion Strategies of the Rice Blast Fungus *Magnaporthe oryzae*. *Plant Cell* 22, 3177–  
971 3187. <https://doi.org/10.1105/tpc.110.078048>
- 972 Marshall, R., Kombrink, A., Motteram, J., Loza-Reyes, E., Lucas, J., Hammond-Kosack, K.E.,  
973 Thomma, B.P.H.J., Rudd, J.J., 2011. Analysis of Two in Planta Expressed LysM  
974 Effector Homologs from the Fungus *Mycosphaerella graminicola* Reveals Novel  
975 Functional Properties and Varying Contributions to Virulence on Wheat. *Plant Physiol.*  
976 156, 756–769. <https://doi.org/10.1104/pp.111.176347>
- 977 Masuda, D., Ishida, M., Yamaguchi, K., Yamaguchi, I., Kimura, M., Nishiuchi, T., 2007.  
978 Phytotoxic effects of trichothecenes on the growth and morphology of *Arabidopsis*  
979 *thaliana*. *J. Exp. Bot.* 58, 1617–1626. <https://doi.org/10.1093/jxb/erl298>
- 980 Mazaheri-Naeini, M., Sabbagh, S.K., Martinez, Y., Séjalon-Delmas, N., Roux, C., 2015.  
981 Assessment of *Ustilago maydis* as a fungal model for root infection studies. *Fungal Biol.*  
982 119, 145–153. <https://doi.org/10.1016/j.funbio.2014.12.002>
- 983 Mentlak, T.A., Kombrink, A., Shinya, T., Ryder, L.S., Otomo, I., Saitoh, H., Terauchi, R.,  
984 Nishizawa, Y., Shibuya, N., Thomma, B.P.H.J., Talbot, N.J., 2012. Effector-Mediated  
985 Suppression of Chitin-Triggered Immunity by *Magnaporthe oryzae* Is Necessary for  
986 Rice Blast Disease. *Plant Cell* 24, 322–335. <https://doi.org/10.1105/tpc.111.092957>
- 987 Moscetti, I., Faoro, F., Moro, S., Sabbadin, D., Sella, L., Favaron, F., D'Ovidio, R., 2015. The  
988 xylanase inhibitor TAXI-III counteracts the necrotic activity of a *Fusarium graminearum*  
989 xylanase in vitro and in durum wheat transgenic plants. *Mol. Plant Pathol.* 16, 583–592.  
990 <https://doi.org/10.1111/mpp.12215>
- 991 Mudge, A.M., Dill-Macky, R., Dong, Y., Gardiner, D.M., White, R.G., Manners, J.M., 2006. A  
992 role for the mycotoxin deoxynivalenol in stem colonisation during crown rot disease of

- 993 wheat caused by *Fusarium graminearum* and *Fusarium pseudograminearum*. *Physiol.*  
994 *Mol. Plant Pathol.* 69, 73–85. <https://doi.org/10.1016/j.pmpp.2007.01.003>
- 995 Navarro, L., Bari, R., Achard, P., Lisón, P., Nemri, A., Harberd, N.P., Jones, J.D.G., 2008.  
996 DELLAs Control Plant Immune Responses by Modulating the Balance of Jasmonic Acid  
997 and Salicylic Acid Signaling. *Curr. Biol.* 18, 650–655.  
998 <https://doi.org/10.1016/j.cub.2008.03.060>
- 999 Oide, S., Berthiller, F., Wiesenberger, G., Adam, G., Turgeon, B.G., 2014. Individual and  
1000 combined roles of malonichrome, ferricrocin, and TAFC siderophores in *Fusarium*  
1001 *graminearum* pathogenic and sexual development. *Front. Microbiol.* 5, 1–15.  
1002 <https://doi.org/10.3389/fmicb.2014.00759>
- 1003 Pan, Y., Liu, Z., Rocheleau, H., Fauteux, F., Wang, Y., McCartney, C., Ouellet, T., 2018.  
1004 Transcriptome dynamics associated with resistance and susceptibility against fusarium  
1005 head blight in four wheat genotypes. *BMC Genomics* 19, 1–26.  
1006 <https://doi.org/10.1186/s12864-018-5012-3>
- 1007 Pasquet, J.-C., Changenet, V., Macadré, C., Boex-Fontvieille, E., Soulhat, C., Bouchabké-  
1008 Coussa, O., Dalmais, M., Atanasova-Pénichon, V., Bendahmane, A., Saindrenan, P.,  
1009 Dufresne, M., 2016. A *Brachypodium* UDP-glycosyltransferase confers root tolerance to  
1010 deoxynivalenol and resistance to *Fusarium* infection. *Plant Physiol.* 172, 559–574.  
1011 <https://doi.org/10.1104/pp.16.00371>
- 1012 Pasquet, J.-C.C., Chaouch, S., Macadré, C., Balzergue, S., Huguet, S., Martin-Magniette,  
1013 M.-L.L., Bellvert, F., Deguercy, X., Thareau, V., Heintz, D., Saindrenan, P., Dufresne,  
1014 M., 2014. Differential gene expression and metabolomic analyses of *Brachypodium*  
1015 *distachyon* infected by deoxynivalenol producing and non-producing strains of  
1016 *Fusarium graminearum*. *BMC Genomics* 15, 1–17. [https://doi.org/10.1186/1471-2164-](https://doi.org/10.1186/1471-2164-15-629)  
1017 15-629
- 1018 Patkar, R.N., Naqvi, N.I., 2017. Fungal manipulation of hormone-regulated plant defense.

- 1019 PLoS Pathog. 13, 10–14. <https://doi.org/10.1371/journal.ppat.1006334>
- 1020 Pieterse, C.M.J., Leon-Reyes, A., Van Der Ent, S., Van Wees, S.C.M., 2009. Networking by  
1021 small-molecule hormones in plant immunity. Nat. Chem. Biol. 5, 308–316.  
1022 <https://doi.org/10.1038/nchembio.164>
- 1023 Pieterse, C.M.J., Van der Does, D., Zamioudis, C., Leon-Reyes, A., Van Wees, S.C.M.,  
1024 2012. Hormonal Modulation of Plant Immunity. Annu. Rev. Cell Dev. Biol. 28, 489–521.  
1025 <https://doi.org/10.1146/annurev-cellbio-092910-154055>
- 1026 Powell, J.J., Carere, J., Sablok, G., Fitzgerald, T.L., Stiller, J., Colgrave, M.L., Gardiner, D.M.,  
1027 Manners, J.M., Vogel, J.P., Henry, R.J., Kazan, K., 2017. Transcriptome analysis of  
1028 Brachypodium during fungal pathogen infection reveals both shared and distinct  
1029 defense responses with wheat. Sci. Rep. 7, 1–14. [https://doi.org/10.1038/s41598-017-](https://doi.org/10.1038/s41598-017-17454-3)  
1030 [17454-3](https://doi.org/10.1038/s41598-017-17454-3)
- 1031 Proctor, R.H., Hohn, T.M., McCormick, S.P., 1995. Reduced virulence of *Gibberella zeae*  
1032 caused by disruption of a trichothecene toxin biosynthetic gene. Mol. Plant. Microbe.  
1033 Interact. 8, 593–601.
- 1034 Puri, K.D., Yan, C., Leng, Y., Zhong, S., 2016. RNA-seq revealed differences in  
1035 transcriptomes between 3ADON and 15ADON populations of *Fusarium graminearum* in  
1036 vitro and in planta. PLoS One 11, 1–30. <https://doi.org/10.1371/journal.pone.0163803>
- 1037 Qi, P.-F., Zhang, Y.-Z., Liu, C.-H., Chen, Q., Guo, Z.-R., Wang, Y., Xu, B.-J., Jiang, Y.-F.,  
1038 Zheng, T., Gong, X., Luo, C.-H., Wu, W., Kong, L., Deng, M., Ma, J., Lan, X.-J., Jiang,  
1039 Q.-T., Wei, Y.-M., Wang, J.-R., Zheng, Y.-L., 2019. Functional Analysis of FgNahG  
1040 Clarifies the Contribution of Salicylic Acid to Wheat (*Triticum aestivum*) Resistance  
1041 against *Fusarium* Head Blight. Toxins (Basel). 11, 59.  
1042 <https://doi.org/10.3390/toxins11020059>
- 1043 Qi, P.F., Balcerzak, M., Rocheleau, H., Leung, W., Wei, Y.M., Zheng, Y.L., Ouellet, T., 2016.

- 1044 Jasmonic acid and abscisic acid play important roles in host-pathogen interaction  
1045 between *Fusarium graminearum* and wheat during the early stages of fusarium head  
1046 blight. *Physiol. Mol. Plant Pathol.* 93, 39–48.  
1047 <https://doi.org/10.1016/j.pmpp.2015.12.004>
- 1048 Quarantin, A., Glasenapp, A., Schäfer, W., Favaron, F., Sella, L., 2016. Involvement of the  
1049 *Fusarium graminearum* cerato-platanin proteins in fungal growth and plant infection.  
1050 *Plant Physiol. Biochem.* 109, 220–229. <https://doi.org/10.1016/j.plaphy.2016.10.001>
- 1051 Rabe, F., Ajami-Rashidi, Z., Doehlemann, G., Kahmann, R., Djamei, A., 2013. Degradation  
1052 of the plant defence hormone salicylic acid by the biotrophic fungus *Ustilago maydis*.  
1053 *Mol. Microbiol.* 89, 179–188. <https://doi.org/10.1111/mmi.12269>
- 1054 Reineke, G., Heinze, B., Schirawski, J., Buettner, H., Kahmann, R., Basse, C.W., 2008.  
1055 Indole-3-acetic acid (IAA) biosynthesis in the smut fungus *Ustilago maydis* and its  
1056 relevance for increased IAA levels in infected tissue and host tumour formation. *Mol.*  
1057 *Plant Pathol.* 9, 339–355. <https://doi.org/10.1111/j.1364-3703.2008.00470.x>
- 1058 Rocheleau, H., Al-harhi, R., Ouellet, T., 2019. Degradation of salicylic acid by *Fusarium*  
1059 *graminearum*. *Fungal Biol.* 123, 77–86. <https://doi.org/10.1016/j.funbio.2018.11.002>
- 1060 Scherm, B., Balmas, V., Spanu, F., Pani, G., Delogu, G., Pasquali, M., Migheli, Q., 2013a.  
1061 *Fusarium culmorum*: Causal agent of foot and root rot and head blight on wheat. *Mol.*  
1062 *Plant Pathol.* 14, 323–341. <https://doi.org/10.1111/mpp.12011>
- 1063 Scherm, B., Balmas, V., Spanu, F., Pani, G., Delogu, G., Pasquali, M., Migheli, Q.,  
1064 Johansson, P.M., Johnsson, L., Gerhardson, B., Hope, R., Aldred, D., Magan, N.,  
1065 Cuomo, C.A., Güldener, U., Xu, J., Trail, F., Turgeon, B.G., Pietro, A. Di, Walton, J.D.,  
1066 Ma, L., Baker, S.E., Rep, M., Adam, G., Antoniw, J., Baldwin, T., Calvo, S., Chang, Y.,  
1067 Harris, L.J., Hilburn, K., Kennell, J.C., Kroken, S., Magnuson, J.K., Muehlbauer, G.,  
1068 Münsterkötter, M., Nelson, D., Donnell, K.O., Ouellet, T., 2013b. The *Fusarium*  
1069 *graminearum* Genome. *Mol. Plant Pathol.* 14, 295–300.

- 1070 <https://doi.org/10.1126/science.1143708>
- 1071 Schuler, D., Wahl, R., Wippel, K., Vranes, M., Münsterkötter, M., Sauer, N., Kämper, J.,  
1072 2015. Hxt1, a monosaccharide transporter and sensor required for virulence of the  
1073 maize pathogen *Ustilago maydis*. *New Phytol.* 206, 1086–1100.  
1074 <https://doi.org/10.1111/nph.13314>
- 1075 Serino, L., Reimann, C., Baur, H., Beyeler, M., Visca, P., Haas, D., 1995. Structural genes  
1076 for salicylate biosynthesis from chorismate in *Pseudomonas aeruginosa*. *Mol. Gen.  
1077 Genet.* 249, 217–228. <https://doi.org/10.1007/BF00290369>
- 1078 Sesma, A., Osbourn, A.E., 2004. The rice leaf blast pathogen undergoes developmental  
1079 processes typical of root-infecting fungi. *Nature* 431, 582–586.  
1080 <https://doi.org/10.1038/nature02880>
- 1081 Sieber, C.M.K., Lee, W., Wong, P., Münsterkötter, M., Mewes, H.-W., Schmeitzl, C., Varga,  
1082 E., Berthiller, F., Adam, G., Güldener, U., 2014. The *Fusarium graminearum* genome  
1083 reveals more secondary metabolite gene clusters and hints of horizontal gene transfer.  
1084 *PLoS One* 9, e110311. <https://doi.org/10.1371/journal.pone.0110311>
- 1085 Smirnova, E., Marquis, V., Poirier, L., Aubert, Y., Zumsteg, J., Ménard, R., Miesch, L., Heitz,  
1086 T., 2017. Jasmonic Acid Oxidase 2 Hydroxylates Jasmonic Acid and Represses Basal  
1087 Defense and Resistance Responses against *Botrytis cinerea* Infection. *Mol. Plant* 10,  
1088 1159–1173. <https://doi.org/10.1016/j.molp.2017.07.010>
- 1089 Sørensen, J.L., Benfield, A.H., Wollenberg, R.D., Westphal, K., Wimmer, R., Nielsen, M.R.,  
1090 Nielsen, K.F., Carere, J., Covarelli, L., Beccari, G., Powell, J., Yamashino, T., Kogler,  
1091 H., Sondergaard, T.E., Gardiner, D.M., 2018. The cereal pathogen *Fusarium*  
1092 *pseudograminearum* produces a new class of active cytokinins during infection. *Mol.  
1093 Plant Pathol.* 19, 1140–1154. <https://doi.org/10.1111/mpp.12593>
- 1094 Spallek, T., Gan, P., Kadota, Y., Shirasu, K., 2018. Same tune, different song — cytokinins

- 1095 as virulence factors in plant–pathogen interactions? *Curr. Opin. Plant Biol.* 44, 82–87.  
1096 <https://doi.org/10.1016/j.pbi.2018.03.002>
- 1097 Spence, C.A., Lakshmanan, V., Donofrio, N., Bais, H.P., 2015. Crucial roles of abscisic acid  
1098 biogenesis in virulence of rice blast fungus *Magnaporthe oryzae*. *Front. Plant Sci.* 6, 1–  
1099 13. <https://doi.org/10.3389/fpls.2015.01082>
- 1100 Sperschneider, J., Dodds, P.N., Gardiner, D.M., Singh, K.B., Taylor, J.M., 2018. Improved  
1101 prediction of fungal effector proteins from secretomes with EffectorP 2.0. *Mol. Plant*  
1102 *Pathol.* 19, 2094–2110. <https://doi.org/10.1111/mpp.12682>
- 1103 Sperschneider, J., Gardiner, D.M., Thatcher, L.F., Lyons, R., Singh, K.B., Manners, J.M.,  
1104 Taylor, J.M., 2015. Genome-wide analysis in three *Fusarium* pathogens identifies  
1105 rapidly evolving chromosomes and genes associated with pathogenicity. *Genome Biol.*  
1106 *Evol.* 7, 1613–1627. <https://doi.org/10.1093/gbe/evv092>
- 1107 Stephens, A.E., Gardiner, D.M., White, R.G., Munn, A.L., Manners, J.M., 2008. Phases of  
1108 infection and gene expression of *Fusarium graminearum* during crown rot disease of  
1109 wheat. *Mol. Plant-Microbe Interact.* 21, 1571–1581. [https://doi.org/10.1094/MPMI-21-](https://doi.org/10.1094/MPMI-21-12-1571)  
1110 [12-1571](https://doi.org/10.1094/MPMI-21-12-1571)
- 1111 Strange, R., Smith, H., Majer, J., 1972. Choline, One of Two Fungal Growth Stimulants in  
1112 Anthers responsible for the Susceptibility of Wheat to *Fusarium graminearum*. *Nature*  
1113 238, 103–104. <https://doi.org/10.1038/238103a0>
- 1114 Struck, C., 2015. Amino acid uptake in rust fungi. *Front. Plant Sci.* 6, 1–6.  
1115 <https://doi.org/10.3389/fpls.2015.00040>
- 1116 Svoboda, T., Parich, A., Güldener, U., Schöffbeck, D., Twaruschek, K., Václavíková, M.,  
1117 Hellinger, R., Wiesenberger, G., Schuhmacher, R., Adam, G., 2019. Biochemical  
1118 Characterization of the *Fusarium graminearum* Candidate ACC-Deaminases and  
1119 Virulence Testing of Knockout Mutant Strains. *Front. Plant Sci.* 10, 1–17.



- 1120 <https://doi.org/10.3389/fpls.2019.01072>
- 1121 Torrens-Spence, M.P., Bobokalonova, A., Carballo, V., Glinkerman, C.M., Pluskal, T., Shen,  
1122 A., Weng, J.-K., 2019. PBS3 and EPS1 complete salicylic acid biosynthesis from  
1123 isochorismate in Arabidopsis. bioRxiv 601948. <https://doi.org/10.1101/601948>
- 1124 Trail, F., 2009. For Blighted Waves of Grain: *Fusarium graminearum* in the Postgenomics  
1125 Era: Figure 1. *Plant Physiol.* 149, 103–110. <https://doi.org/10.1104/pp.108.129684>
- 1126 Tsitsigiannis, D.I., Keller, N.P., 2007. Oxylipins as developmental and host-fungal  
1127 communication signals. *Trends Microbiol.* 15, 109–118.  
1128 <https://doi.org/10.1016/j.tim.2007.01.005>
- 1129 Ursache, R., Andersen, T.G., Marhavý, P., Geldner, N., 2018. A protocol for combining  
1130 fluorescent proteins with histological stains for diverse cell wall components. *Plant J.* 93,  
1131 399–412. <https://doi.org/10.1111/tpj.13784>
- 1132 Voigt, C.A., Schäfer, W., Salomon, S., 2005. A secreted lipase of *Fusarium graminearum* is  
1133 a virulence factor required for infection of cereals. *Plant J.* 42, 364–375.  
1134 <https://doi.org/10.1111/j.1365-313X.2005.02377.x>
- 1135 Wang, H., Sun, S., Ge, W., Zhao, L., Hou, B., Wang, K., Lyu, Z., Chen, L., Xu, S., Guo, J., Li,  
1136 M., Su, P., Li, Xuefeng, Wang, G., Bo, C., Fang, X., Zhuang, W., Cheng, X., Wu, J.,  
1137 Dong, L., Chen, W., Li, W., Xiao, G., Zhao, J., Hao, Y., Xu, Y., Gao, Y., Liu, W., Liu, Y.,  
1138 Yin, H., Li, J., Li, Xiang, Zhao, Y., Wang, X., Ni, F., Ma, X., Li, A., Xu, S.S., Bai, G.,  
1139 Nevo, E., Gao, C., Ohm, H., Kong, L., 2020. Horizontal gene transfer of *Fhb7* from  
1140 fungus underlies *Fusarium* head blight resistance in wheat. *Science* (80- ). 5435,  
1141 eaba5435. <https://doi.org/10.1126/science.aba5435>
- 1142 Wang, L., Li, Q., Liu, Z., Surendra, A., Pan, Y., Li, Y., Zaharia, L.I., Ouellet, T., Fobert, P.R.,  
1143 2018. Integrated transcriptome and hormone profiling highlight the role of multiple  
1144 phytohormone pathways in wheat resistance against *Fusarium* head blight. *PLoS One*

- 1145 13, e0207036. <https://doi.org/10.1371/journal.pone.0207036>
- 1146 Wang, Q., Shao, B., Shaikh, F.I., Friedt, W., Gottwald, S., 2018. Wheat Resistances to  
1147 Fusarium Root Rot and Head Blight Are Both Associated with Deoxynivalenol- and  
1148 Jasmonate-Related Gene Expression. *Phytopathology* 108, 602–616.  
1149 <https://doi.org/10.1094/PHYTO-05-17-0172-R>
- 1150 Wang, Q., Vera Buxa, S., Furch, A., Friedt, W., Gottwald, S., 2015. Insights Into *Triticum*  
1151 *aestivum* Seedling Root Rot Caused by *Fusarium graminearum*. *Mol. Plant-Microbe*  
1152 *Interact.* 28, 1288–1303. <https://doi.org/10.1094/MPMI-07-15-0144-R>
- 1153 Wiemann, P., Sieber, C.M.K., von Bargen, K.W., Studt, L., Niehaus, E.M., Espino, J.J., Huß,  
1154 K., Michielse, C.B., Albermann, S., Wagner, D., Bergner, S. V., Connolly, L.R., Fischer,  
1155 A., Reuter, G., Kleigrewe, K., Bald, T., Wingfield, B.D., Ophir, R., Freeman, S., Hippler,  
1156 M., Smith, K.M., Brown, D.W., Proctor, R.H., Münsterkötter, M., Freitag, M., Humpf,  
1157 H.U., Güldener, U., Tudzynski, B., 2013. Deciphering the Cryptic Genome: Genome-  
1158 wide Analyses of the Rice Pathogen *Fusarium fujikuroi* Reveal Complex Regulation of  
1159 Secondary Metabolism and Novel Metabolites. *PLoS Pathog.* 9.  
1160 <https://doi.org/10.1371/journal.ppat.1003475>
- 1161 Wildermuth, M.C., Dewdney, J., Wu, G., Ausubel, F.M., 2002. Isochorismate synthase is  
1162 required to synthesize salicylic acid for plant defence. *Nature* 417, 571–571.  
1163 <https://doi.org/10.1038/417571a>
- 1164 Yan, X., Talbot, N.J., 2016. Investigating the cell biology of plant infection by the rice blast  
1165 fungus *Magnaporthe oryzae*. *Curr. Opin. Microbiol.* 34, 147–153.  
1166 <https://doi.org/10.1016/j.mib.2016.10.001>
- 1167 Yang, F., Jensen, J.D., Svensson, B., Jørgensen, H.J.L., Collinge, D.B., Finnie, C., 2012.  
1168 Secretomics identifies *Fusarium graminearum* proteins involved in the interaction with  
1169 barley and wheat. *Mol. Plant Pathol.* 13, 445–453. [https://doi.org/10.1111/j.1364-](https://doi.org/10.1111/j.1364-3703.2011.00759.x)  
1170 [3703.2011.00759.x](https://doi.org/10.1111/j.1364-3703.2011.00759.x)

- 1171 Yin, Y., Wang, Z., Cheng, D., Chen, X., Chen, Y., Ma, Z., 2018. The ATP-binding protein  
1172 FgArb1 is essential for penetration, infectious and normal growth of *Fusarium*  
1173 *graminearum*. *New Phytol.* 219, 1447–1466. <https://doi.org/10.1111/nph.15261>
- 1174 Yu, J.H., Wieser, J., Adams, T.H., 1996. The *Aspergillus* FlibA RGS domain protein  
1175 antagonizes G protein signaling to block proliferation and allow development. *EMBO J.*  
1176 15, 5184–5190. <https://doi.org/10.1002/j.1460-2075.1996.tb00903.x>
- 1177 Yu, Y., Ouyang, Y., Yao, W., 2018. ShinyCircos: An R/Shiny application for interactive  
1178 creation of Circos plot. *Bioinformatics* 34, 1229–1231.  
1179 <https://doi.org/10.1093/bioinformatics/btx763>
- 1180 Zhang, X.-W., Jia, L.-J., Zhang, Y., Jiang, G., Li, X., Zhang, D., Tang, W.-H., 2012. In *Planta*  
1181 Stage-Specific Fungal Gene Profiling Elucidates the Molecular Strategies of *Fusarium*  
1182 *graminearum* Growing inside Wheat Coleoptiles. *Plant Cell* 24, 5159–5176.  
1183 <https://doi.org/10.1105/tpc.112.105957>
- 1184 Zhang, Y., He, J., Jia, L.J., Yuan, T.L., Zhang, D., Guo, Y., Wang, Y., Tang, W.H., 2016.  
1185 Cellular Tracking and Gene Profiling of *Fusarium graminearum* during Maize Stalk Rot  
1186 Disease Development Elucidates Its Strategies in Confronting Phosphorus Limitation in  
1187 the Host Apoplast. *PLoS Pathog.* 12, 1–33.  
1188 <https://doi.org/10.1371/journal.ppat.1005485>
- 1189 Zhou, S., Zhang, Y.K., Kremling, K.A., Ding, Y., Bennett, J.S., Bae, J.S., Kim, D.K.,  
1190 Ackerman, H.H., Kolomiets, M. V., Schmelz, E.A., Schroeder, F.C., Buckler, E.S.,  
1191 Jander, G., 2019. Ethylene signaling regulates natural variation in the abundance of  
1192 antifungal acetylated diferuloylsucroses and *Fusarium graminearum* resistance in  
1193 maize seedling roots. *New Phytol.* 221, 2096–2111. <https://doi.org/10.1111/nph.15520>

1194

1195 **Figures**

1196 **Figure 1.** Global regulation of *Fg* genes during *Bd* root colonization. (A) Expression of 2049  
1197 *Fg* genes that were differentially regulated during *Bd* root infections (*Fg-Bd*) relative to *Fg*  
1198 grown in culture (*Fg-only*). Proteins encoded by differentially expressed genes (DEGs) are  
1199 assigned to four functional categories as shown in the right side of the figure. (B) Key  
1200 features of 225 DEGs associated with carbohydrate active enzymes (CAZymes). Enzymatic  
1201 functions and substrate specificities were predicted as shown in the right side of the figure.  
1202 PCW: plant cell wall, FCW: fungal cell wall. (C) Key features of 251 DEGs encoding putative  
1203 secreted proteins. *Bd* roots colonized by *Fg* (*Fg-Bd*) were harvested at 5 dpi and *Fg* mycelia  
1204 grown without *Bd* roots were used as control (*Fg-only*). Transcript levels of fungal genes  
1205 were presented as normalized FPKM (Fragments Per Kilobase of transcript per Million  
1206 mapped reads) values and log<sub>2</sub>-transformed. Heatmap colour range represents high to low  
1207 expression levels. The dendrogram shows distance similarity of expression of each gene.

1208 **Figure 2.** The number of *Fg* genes upregulated during *Bd* root infection were also induced or  
1209 actively expressed during the infection of other tissues by *Fg*, suggesting that a core  
1210 number of *Fg* genes could be broadly associated with infection (A) The Venn diagram  
1211 showing how many *Fg* genes that were observed to be up-regulated during *Bd* root infection  
1212 in this study were common to those upregulated or differentially expressed in different  
1213 tissues of wheat (*Triticum aestivum*, *Ta*), barley (*Hordeum vulgare*, *Hv*) and maize (*Zea*  
1214 *mays*, *Zm*). (B) The heatmap showing differential expression profiles of 38 core *Fg* genes  
1215 identified from (A) between *in vitro* growth and during *Bd* root infection. FPKM values from  
1216 three independent biological replicates were log<sub>2</sub>-transformed. Putative proteins encoded by  
1217 these genes are shown on the right.

1218 **Figure 3.** Genome-wide comparison of *Fg* and *F. pseudograminearum* (*Fp*) gene expression  
1219 patterns during infection of *Bd* roots (this study) and aboveground tissues (Powell et al.,  
1220 2017). (A) Chromosomal locations and syntenic relationship of highly conserved *Fg* and *Fp*  
1221 genes. (1-4: *Fg* chromosomes; NC\_031952.1-NC\_031952.4: *Fp* chromosomes). (B) The top  
1222 20 genes with the most contrasted expression values were selected from chromosome 2 of

1223 *Fg* and *Fp* genomes, respectively. Heat maps in A and B display expression of genes as  
1224 log<sub>2</sub>-transformed FPKM values from three biological replicates. Colour range is indicated as  
1225 high (red) to low (blue).

1226 **Figure 4.** Global regulation of *Fg* genes in the *Tri5* mutant during *Bd* root colonization. (A)  
1227 Expression of 974 *Fg* genes that were differentially expressed WT *Fg* and  $\Delta$ Tri5 during *Bd*  
1228 root infection. Proteins encoded by DEGs were assigned to four functional categories as  
1229 shown on the right. (B) Key features of 95 DEGs associated with carbohydrate active  
1230 enzymes (CAZymes). Plant cell wall (PCW) degradation functions and substrate specificities  
1231 were predicted as shown in the right-hand side. (C) Key features of 124 DEGs encoding  
1232 putative secreted proteins. *Bd* roots inoculated with *Fg* WT and  $\Delta$ Tri5 strains were harvested  
1233 at 5 dpi for the RNA-seq analysis. Transcript levels of *Fg* genes were log<sub>2</sub>-transformed and  
1234 presented as normalized FPKM values. Heatmap colour range representing high to low  
1235 expression levels is shown. Dendrograms show distance similarity of expression of each  
1236 gene.

1237 **Figure 5.** Lignin deposition in response to *Fg* infection is reduced in *Bd* roots inoculated with  
1238  $\Delta$ Tri5. *Bd* roots either mock-treated or inoculated with either WT *Fg* or  $\Delta$ Tri5 were harvested  
1239 at 5 dpi. Red fluorescence signals (lower panels) indicate lignin deposition stained by Basic  
1240 Fuchsin. Shown are representatives of at least 6 independent roots from three biological  
1241 replicates. Images were taken using 561nm excitation and detected at 600–650 nm on a  
1242 Zeiss Axio Imager M2 microscopy.

1243 **Figure 6.** Quantification of selected phytohormones and DON in *Bd* roots inoculated with  
1244 either WT *Fg* or the  $\Delta$ Tri5 mutant; jasmonic acid (JA) (**A**), methyl-jasmonate (MeJA) (**B**),  
1245 salicylic acid (SA) (**C**), deoxynivalenol (DON) (**D**), indole-3-acetic acid (IAA) (**E**) and  
1246 gibberellic acid (GA) (**F**) analysed by high-performance liquid chromatography.  
1247 Independently grown fungal mycelium on minimal media (MM) (*Fg*-only), uninoculated *Bd*  
1248 roots (*Bd*-only), as well as *Bd* roots inoculated with WT *Fg* or  $\Delta$ Tri5 infected roots were  
1249 collected from MM at 5 dpi and subjected to metabolite extraction. Pure MM was used as

1250 background control. Metabolite quantifications were conducted according to the  
1251 concentration-gradient derived standard curves of JA, MeJA, SA, DON, IAA and GA. Error  
1252 bars indicate standard error of the mean based on six biological replicates, each comprising  
1253 of 10 plants or 1 plate of fungal mycelium. Asterisks represent differences that were  
1254 statistically significant (unpaired two-tailed t-test, \* $P < 0.05$ . \*\*\*\* $P < 0.0001$ ).

1255 **Figure 7.** Deoxynivalenol (DON) produced by *F. graminearum* (*Fg*) during the infection of *B.*  
1256 *distachyon* (*Bd*) roots does not contribute to lesion formation. Microscopic pictures were  
1257 taken for *Bd* roots colonized by *Fg* strains after two days post inoculation (dpi). **(A)** DON is  
1258 produced during the infection of *Bd* roots by *Fg*. Strong florescence signals could be  
1259 observed in the mycelium of a *Fg* strain expressing a *Tri5-GFP* fusion construct driven by  
1260 the native *Tri5* promoter. **(B)** No GFP signals could be detectable for WT *Fg* during root  
1261 infection. **(C)** Transcriptional activation of *Tri5* confirms DON production in infected roots.  
1262 Expressions of *Tri5*, *Flp1*, a lipase encoding gene previously identified as a virulence factor  
1263 in *Fg* and a *Bd* ubiquitin-conjugating enzyme 18 gene (*UBC18*) used for fungal biomass  
1264 measurements were quantified by RT-qPCR relative to the fungal  $\alpha$ -*tubulin*. Root samples  
1265 were harvested at 2, 3, 4, 5, and 7 dpi from three independent biological replicates each with  
1266 at least 12 individual plants. **(D)** Deoxynivalenol (DON) does not contribute to lesion  
1267 formation in *Bd* roots. Representative photos showing colonization of *Bd* roots with the WT  
1268 *Fg* and *Tri5* deletion mutants.

1269 **Figure 8.** SA hydroxylase-like genes present in the *Fg* genome and their expression profiles  
1270 during growth in culture or infection of *Bd* roots. **(A)** Phylogenetic unrooted tree of SA  
1271 hydroxylase protein homologs of NahG, Arabidopsis Dlo1 (AT4G10500) and Dmr6  
1272 (AT5G24530) in *Fg*. The protein evolutionary models were tested using Neighbor-Joining  
1273 inference and then referred to tree building based on Maximum Likelihood method. **(B)**  
1274 Expressions of 28 SA hydroxylase candidate genes during *Bd* root infections or *in vitro*  
1275 growth on minimal medium (MM). Heatmap shows expression levels of each gene displayed  
1276 as log-transformed FPKM values of three replicates from low (blue) to high (red). *Fg* genes

1277 significantly induced during *Bd* root infection were marked as 'yes'. An overview of  
1278 concatenated alignment of all protein sequences was shown aside.

1279

1280

1281

1282

1283

1284

1285

1286

1287

1288

1289

1290



**A**Expression  $\log_2(\text{FPKM}+0.01)$ 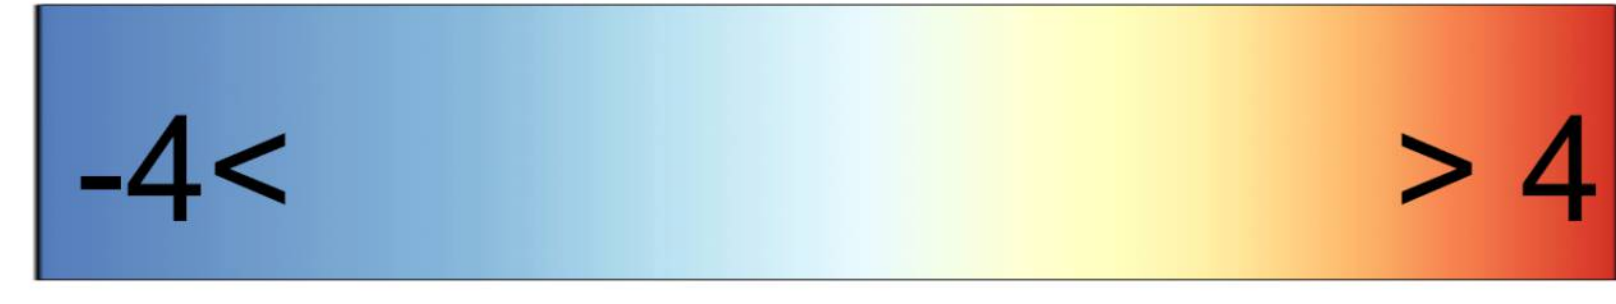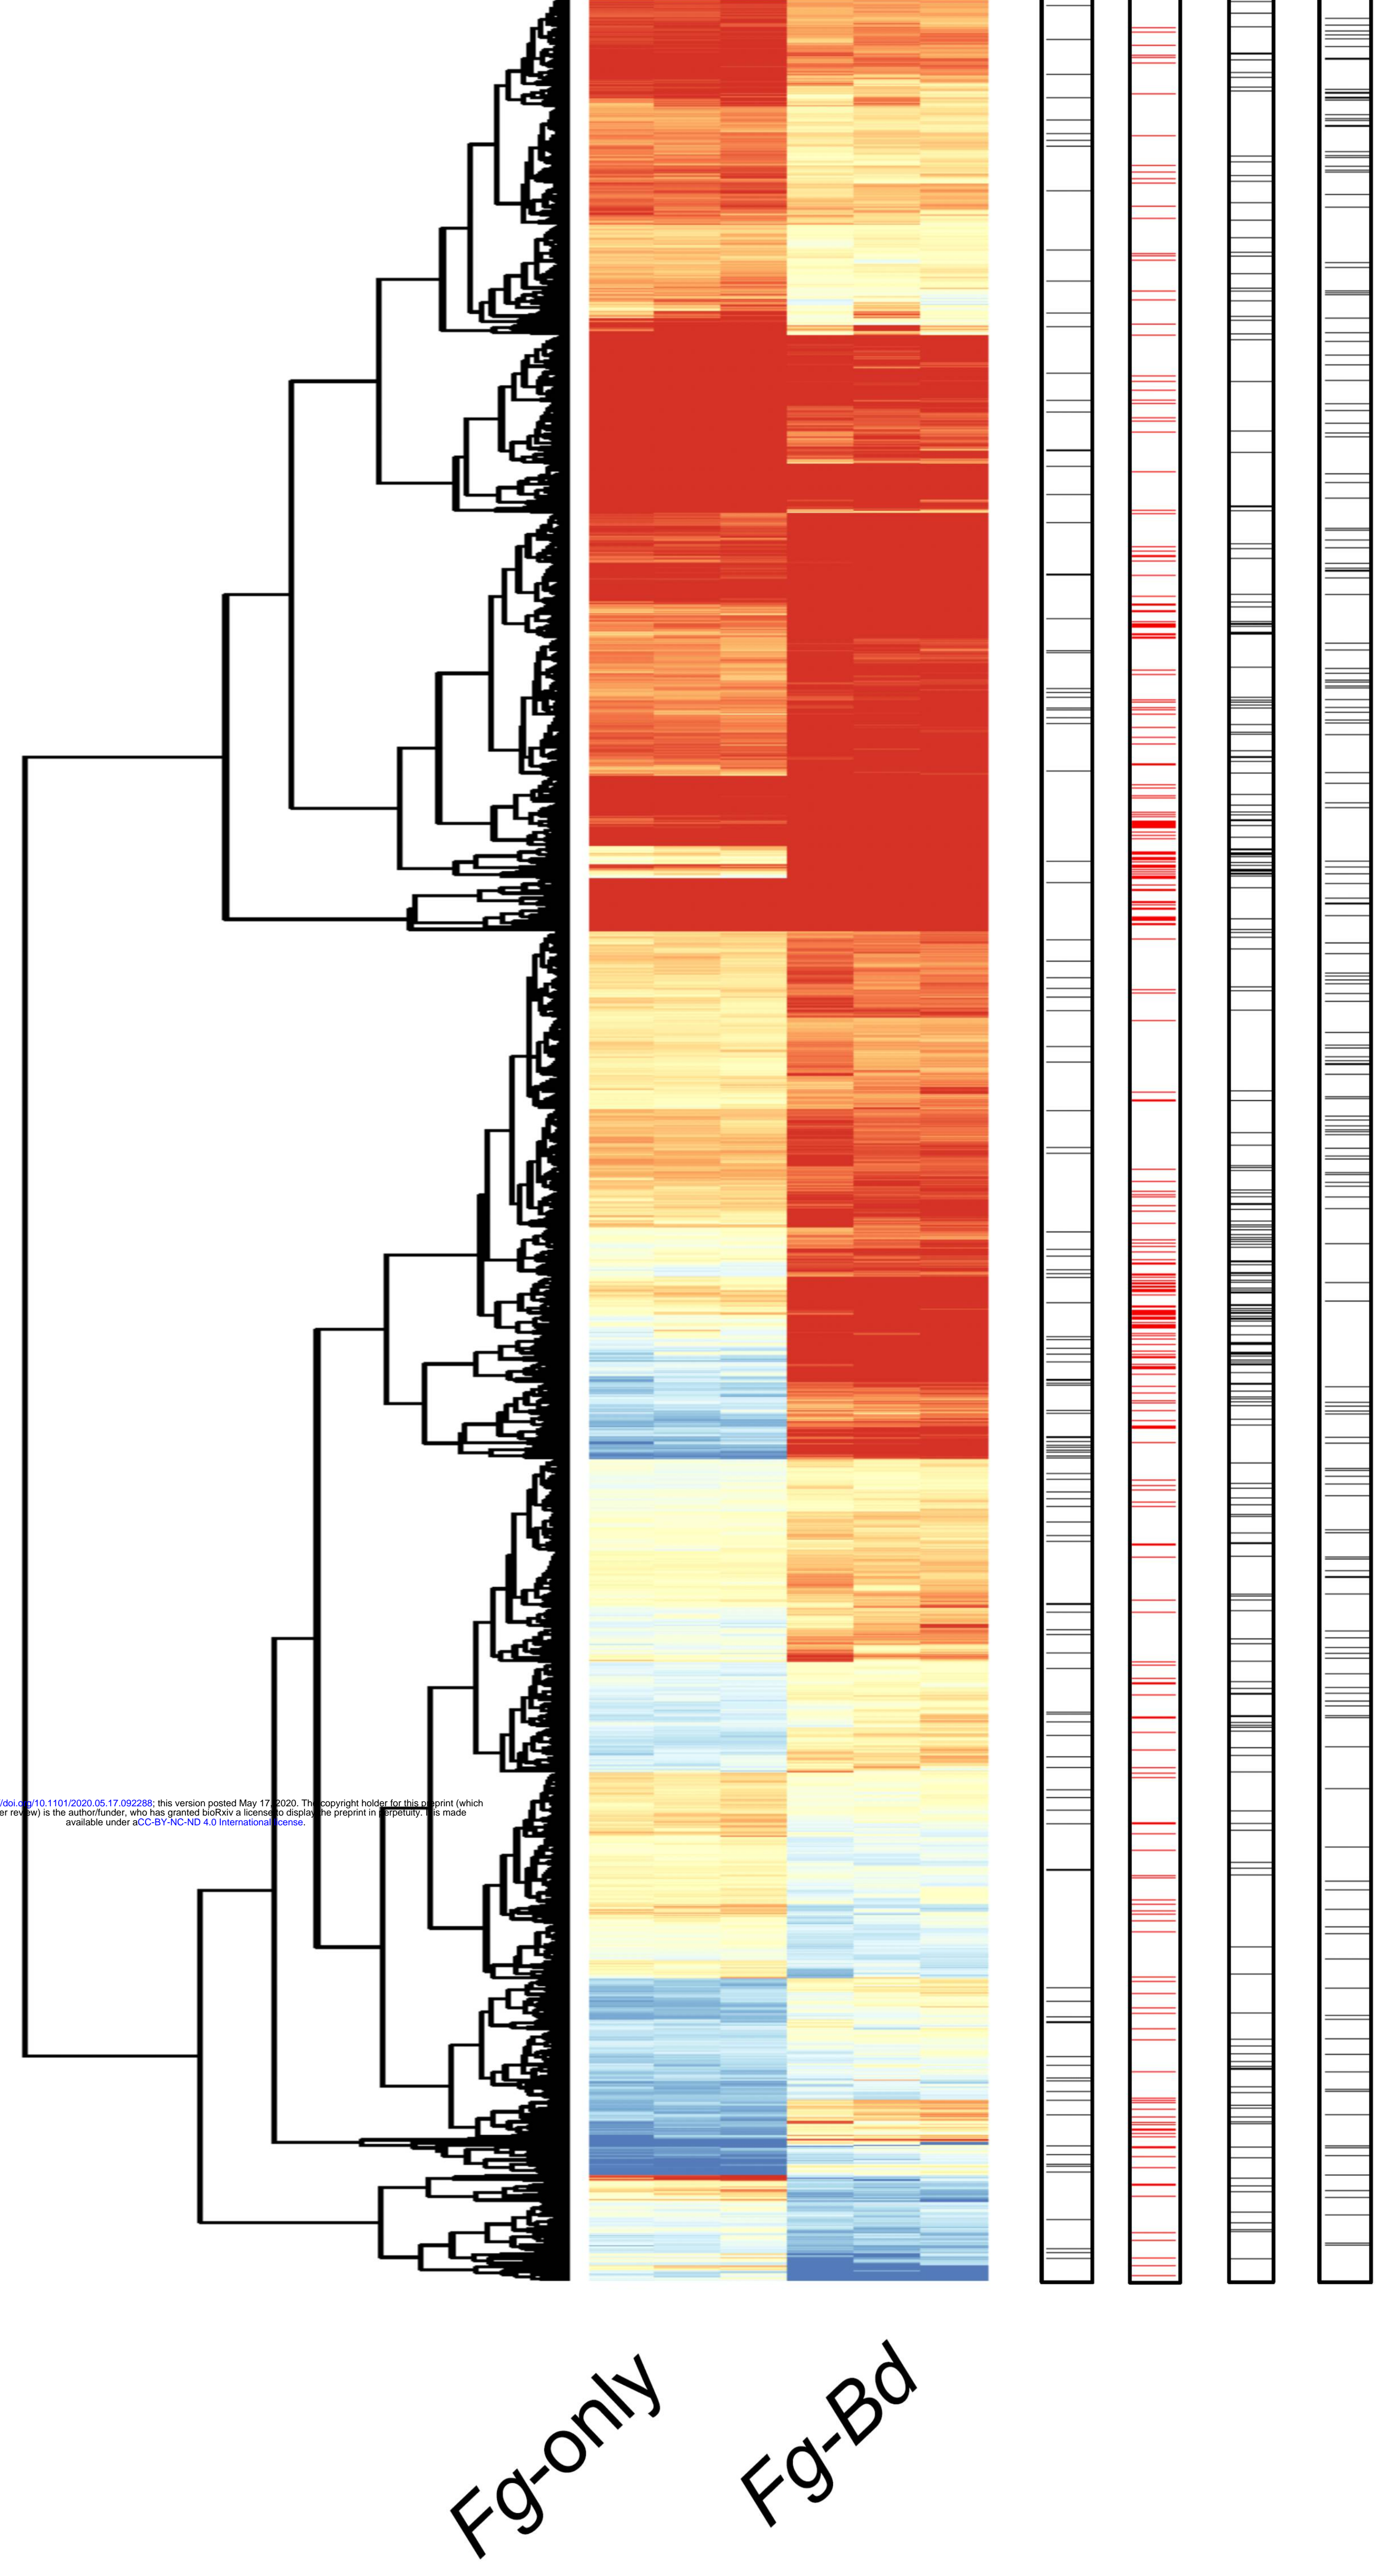**B**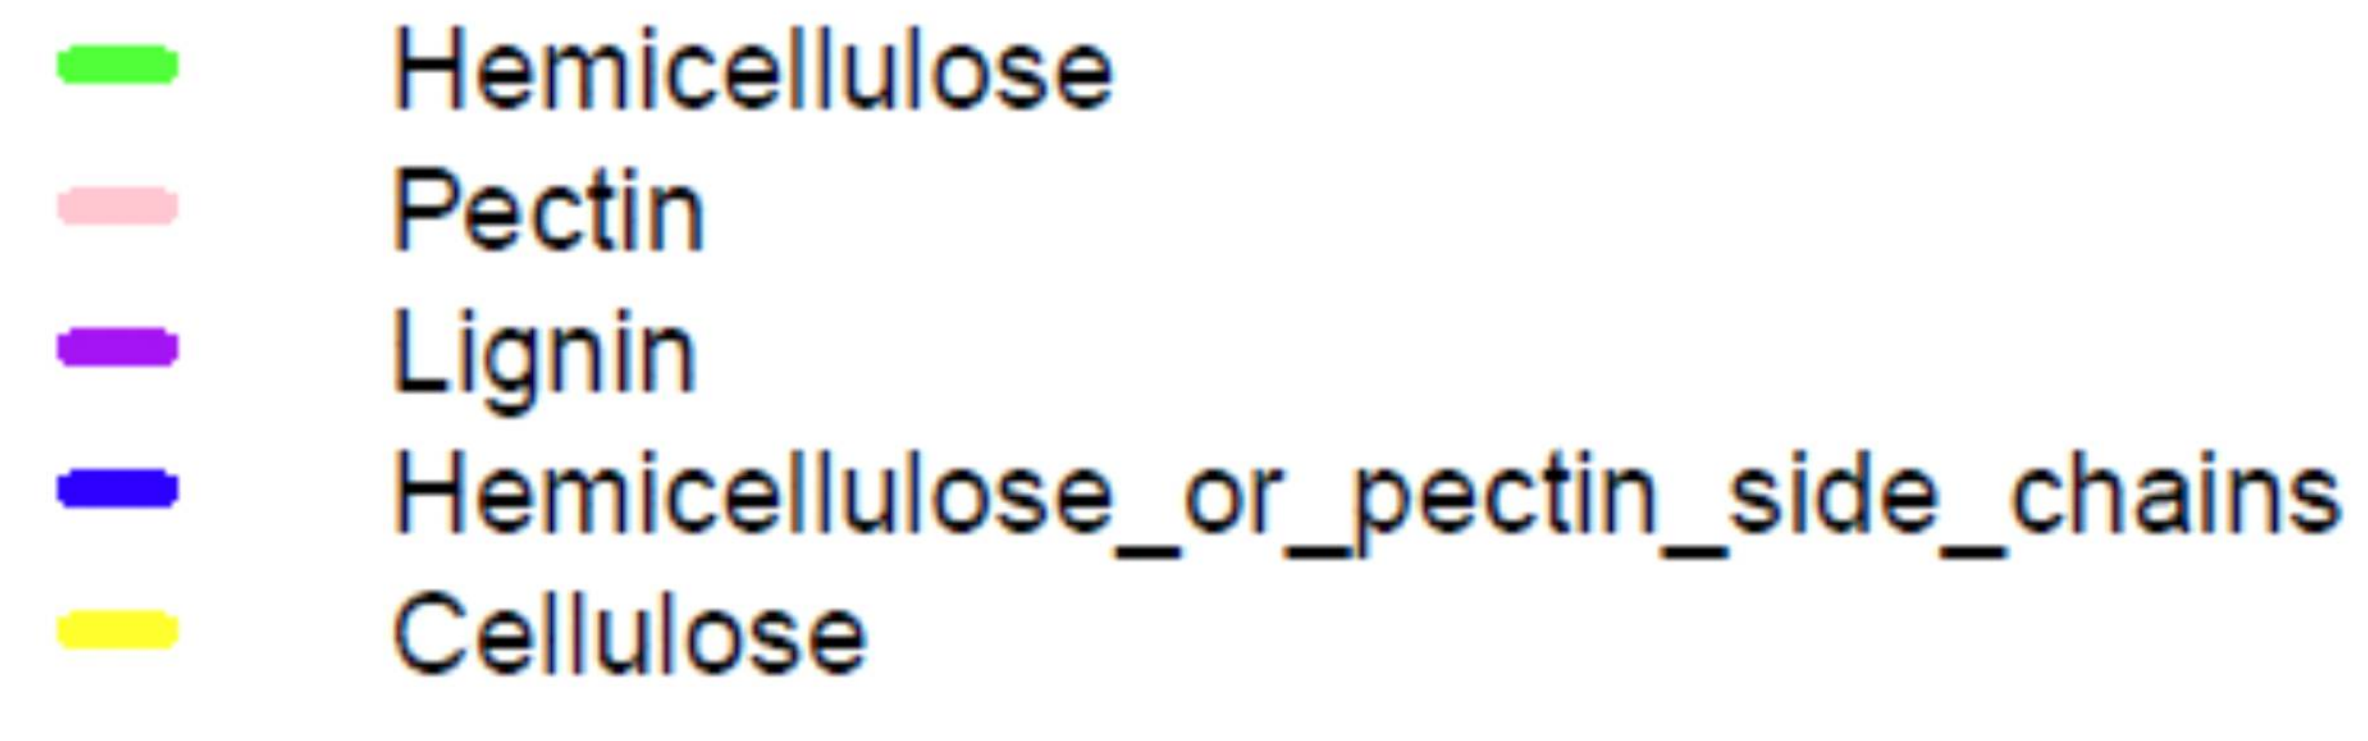**CAZymes**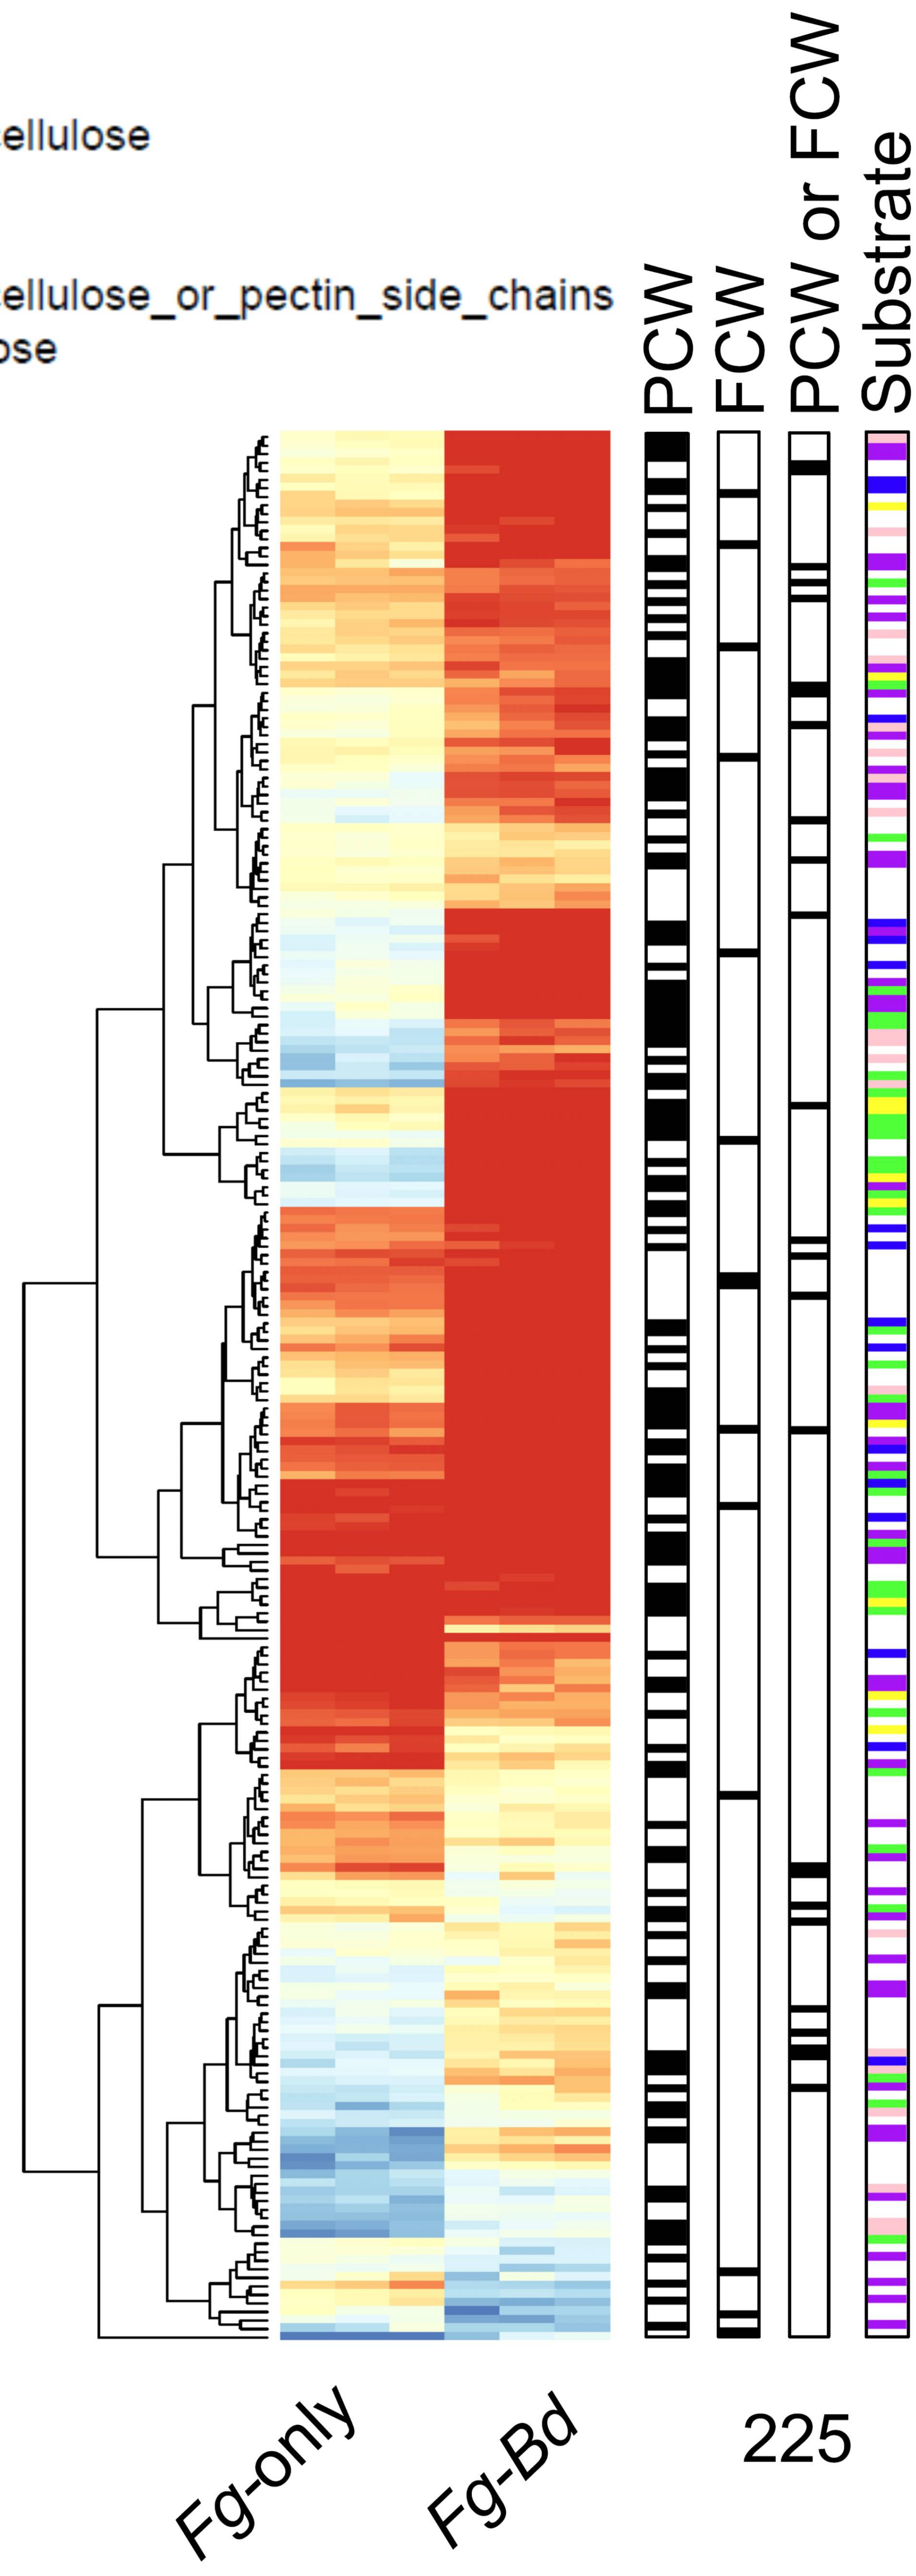**C****Secreted proteins**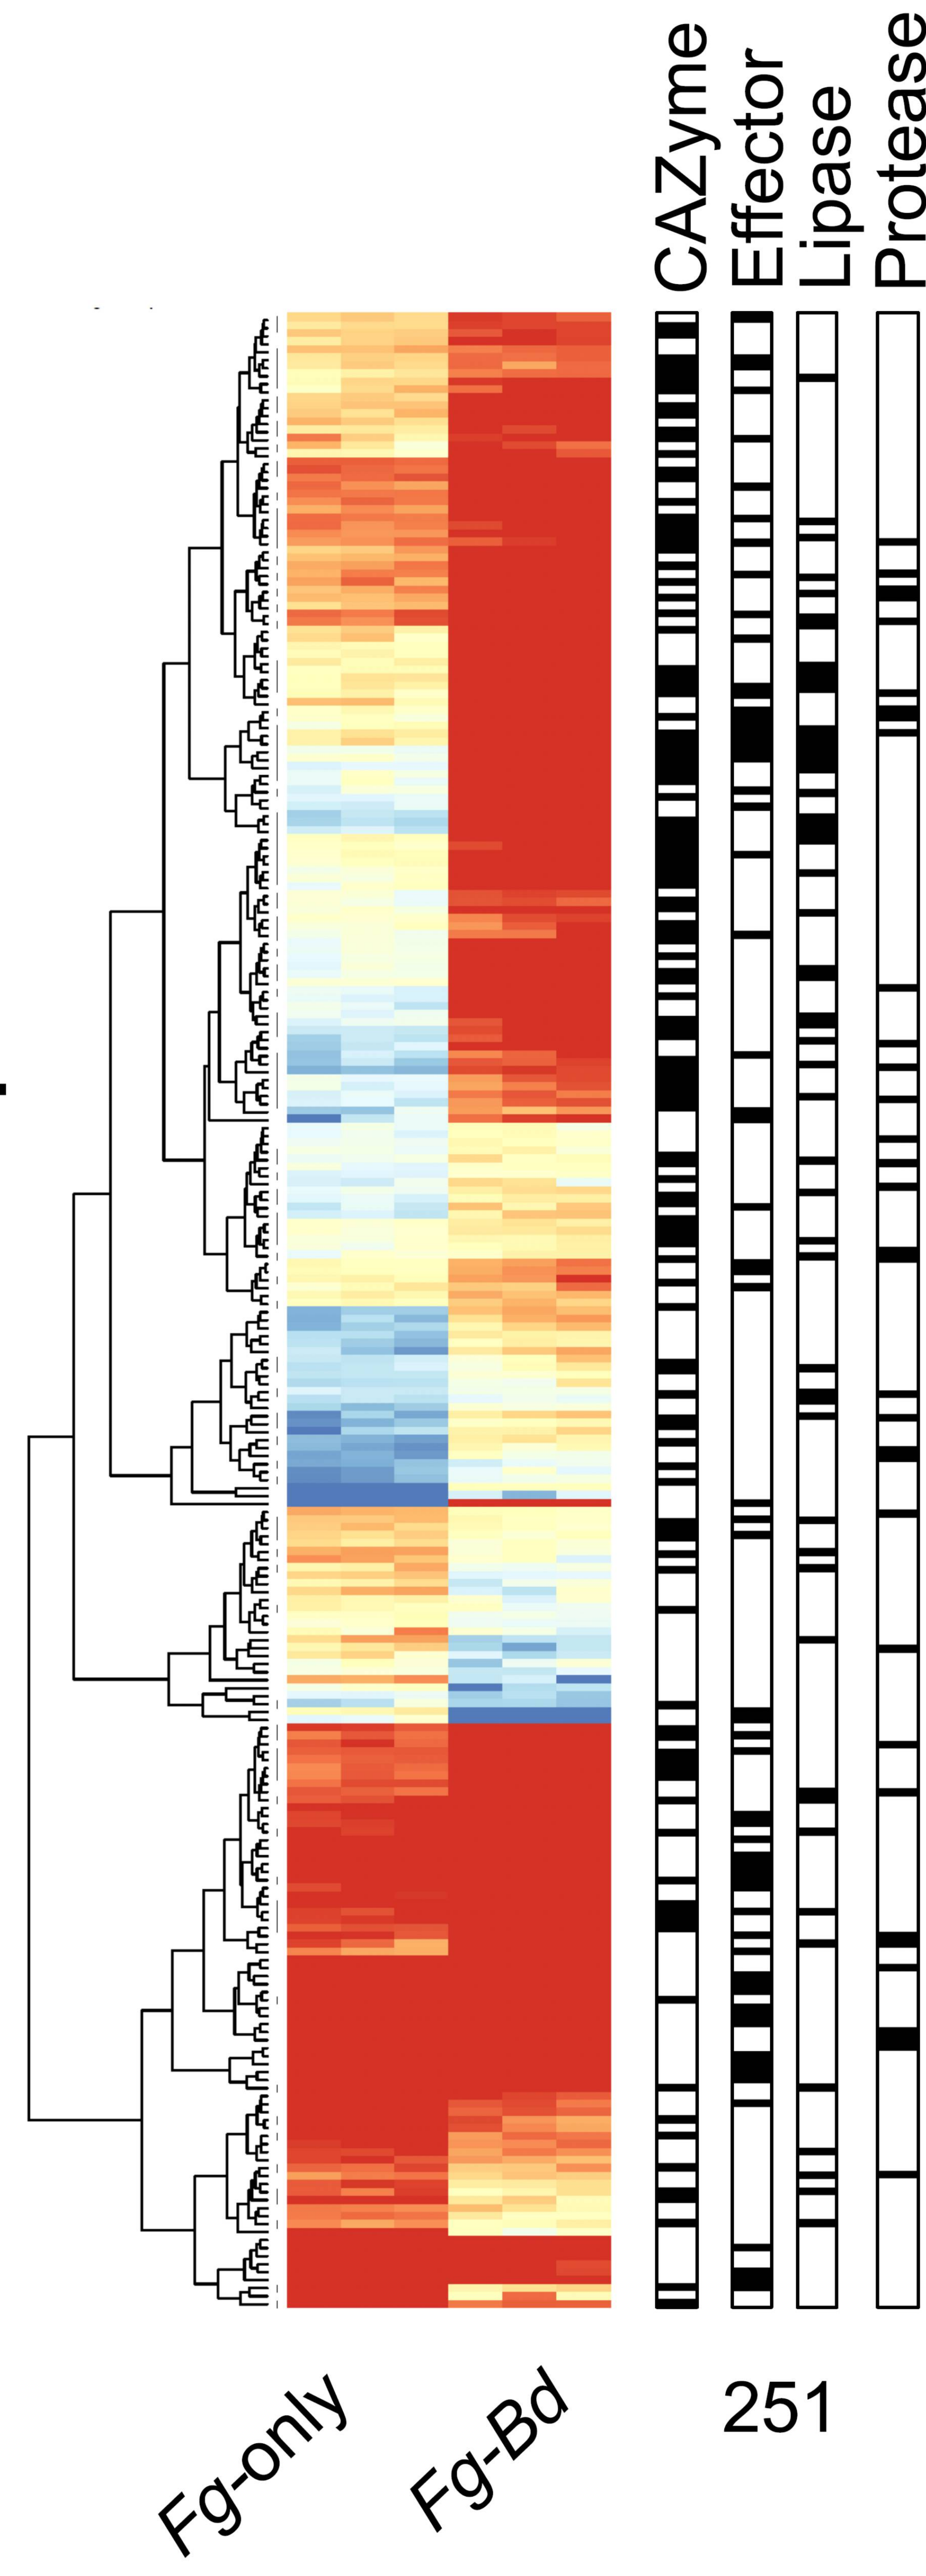







**A**

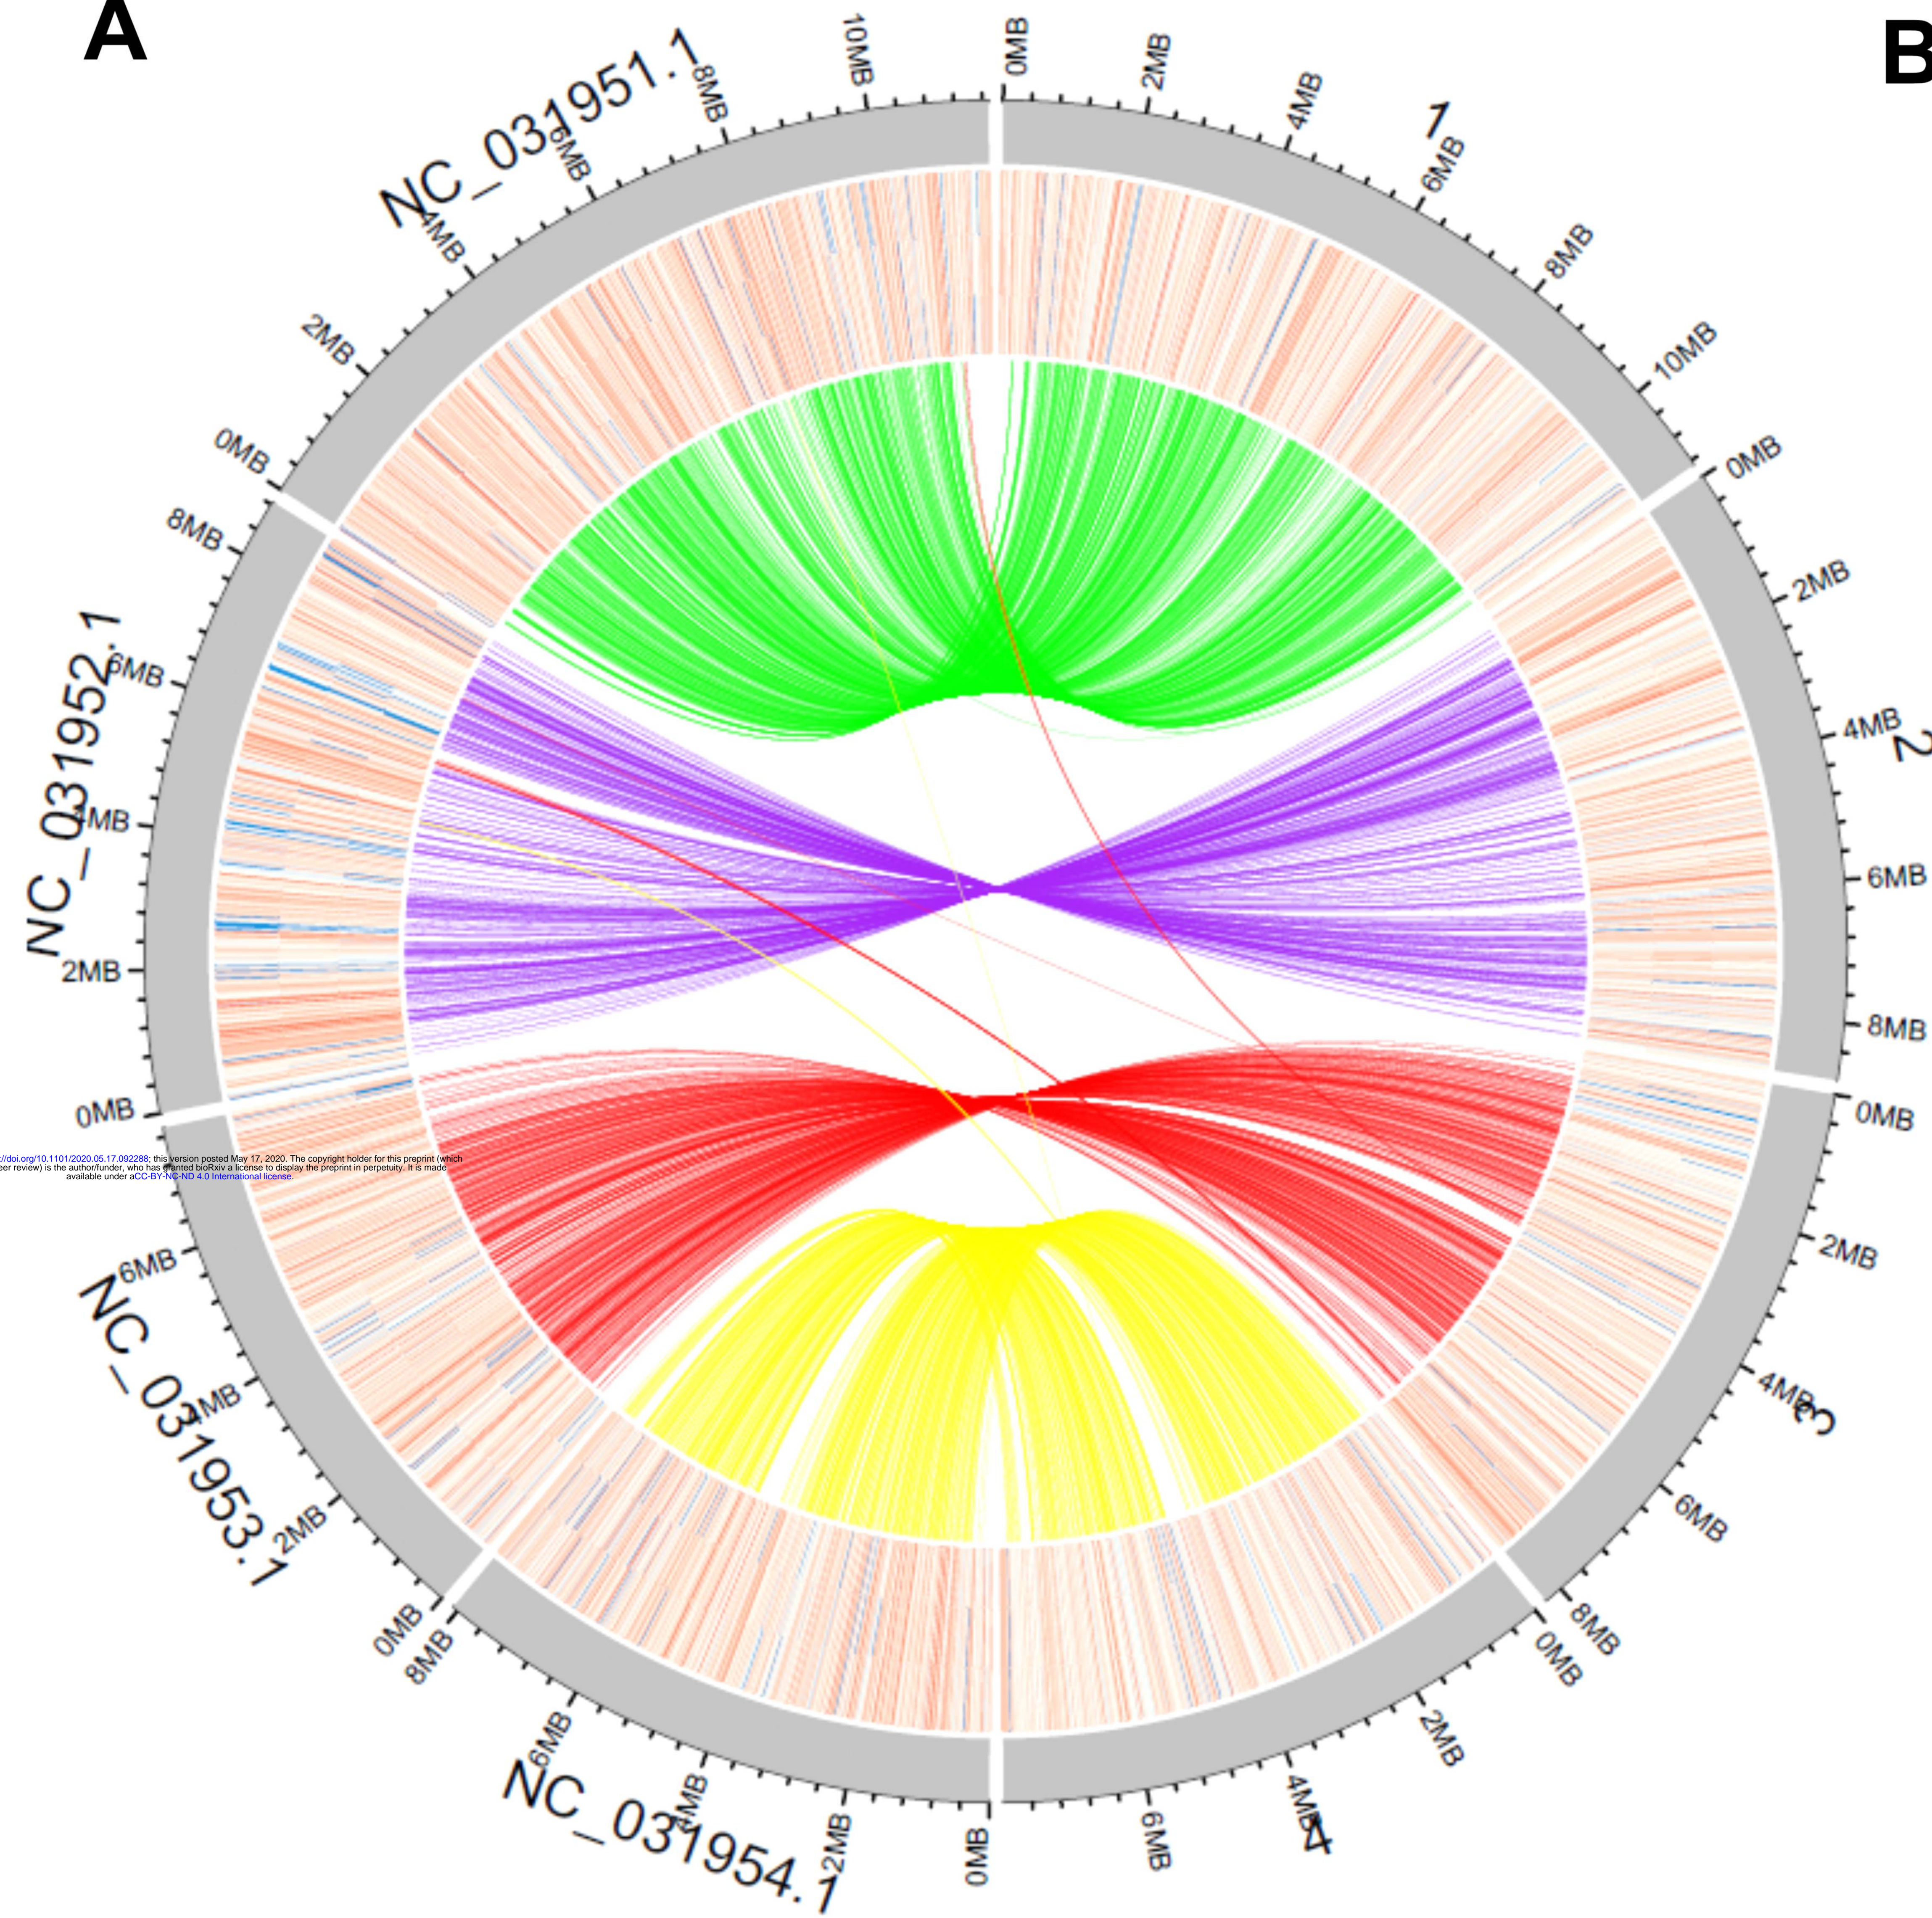

**B**

row min row max  
Expression  $\log_2(\text{FPKM}+0.01)$

Roots  
Aboveground

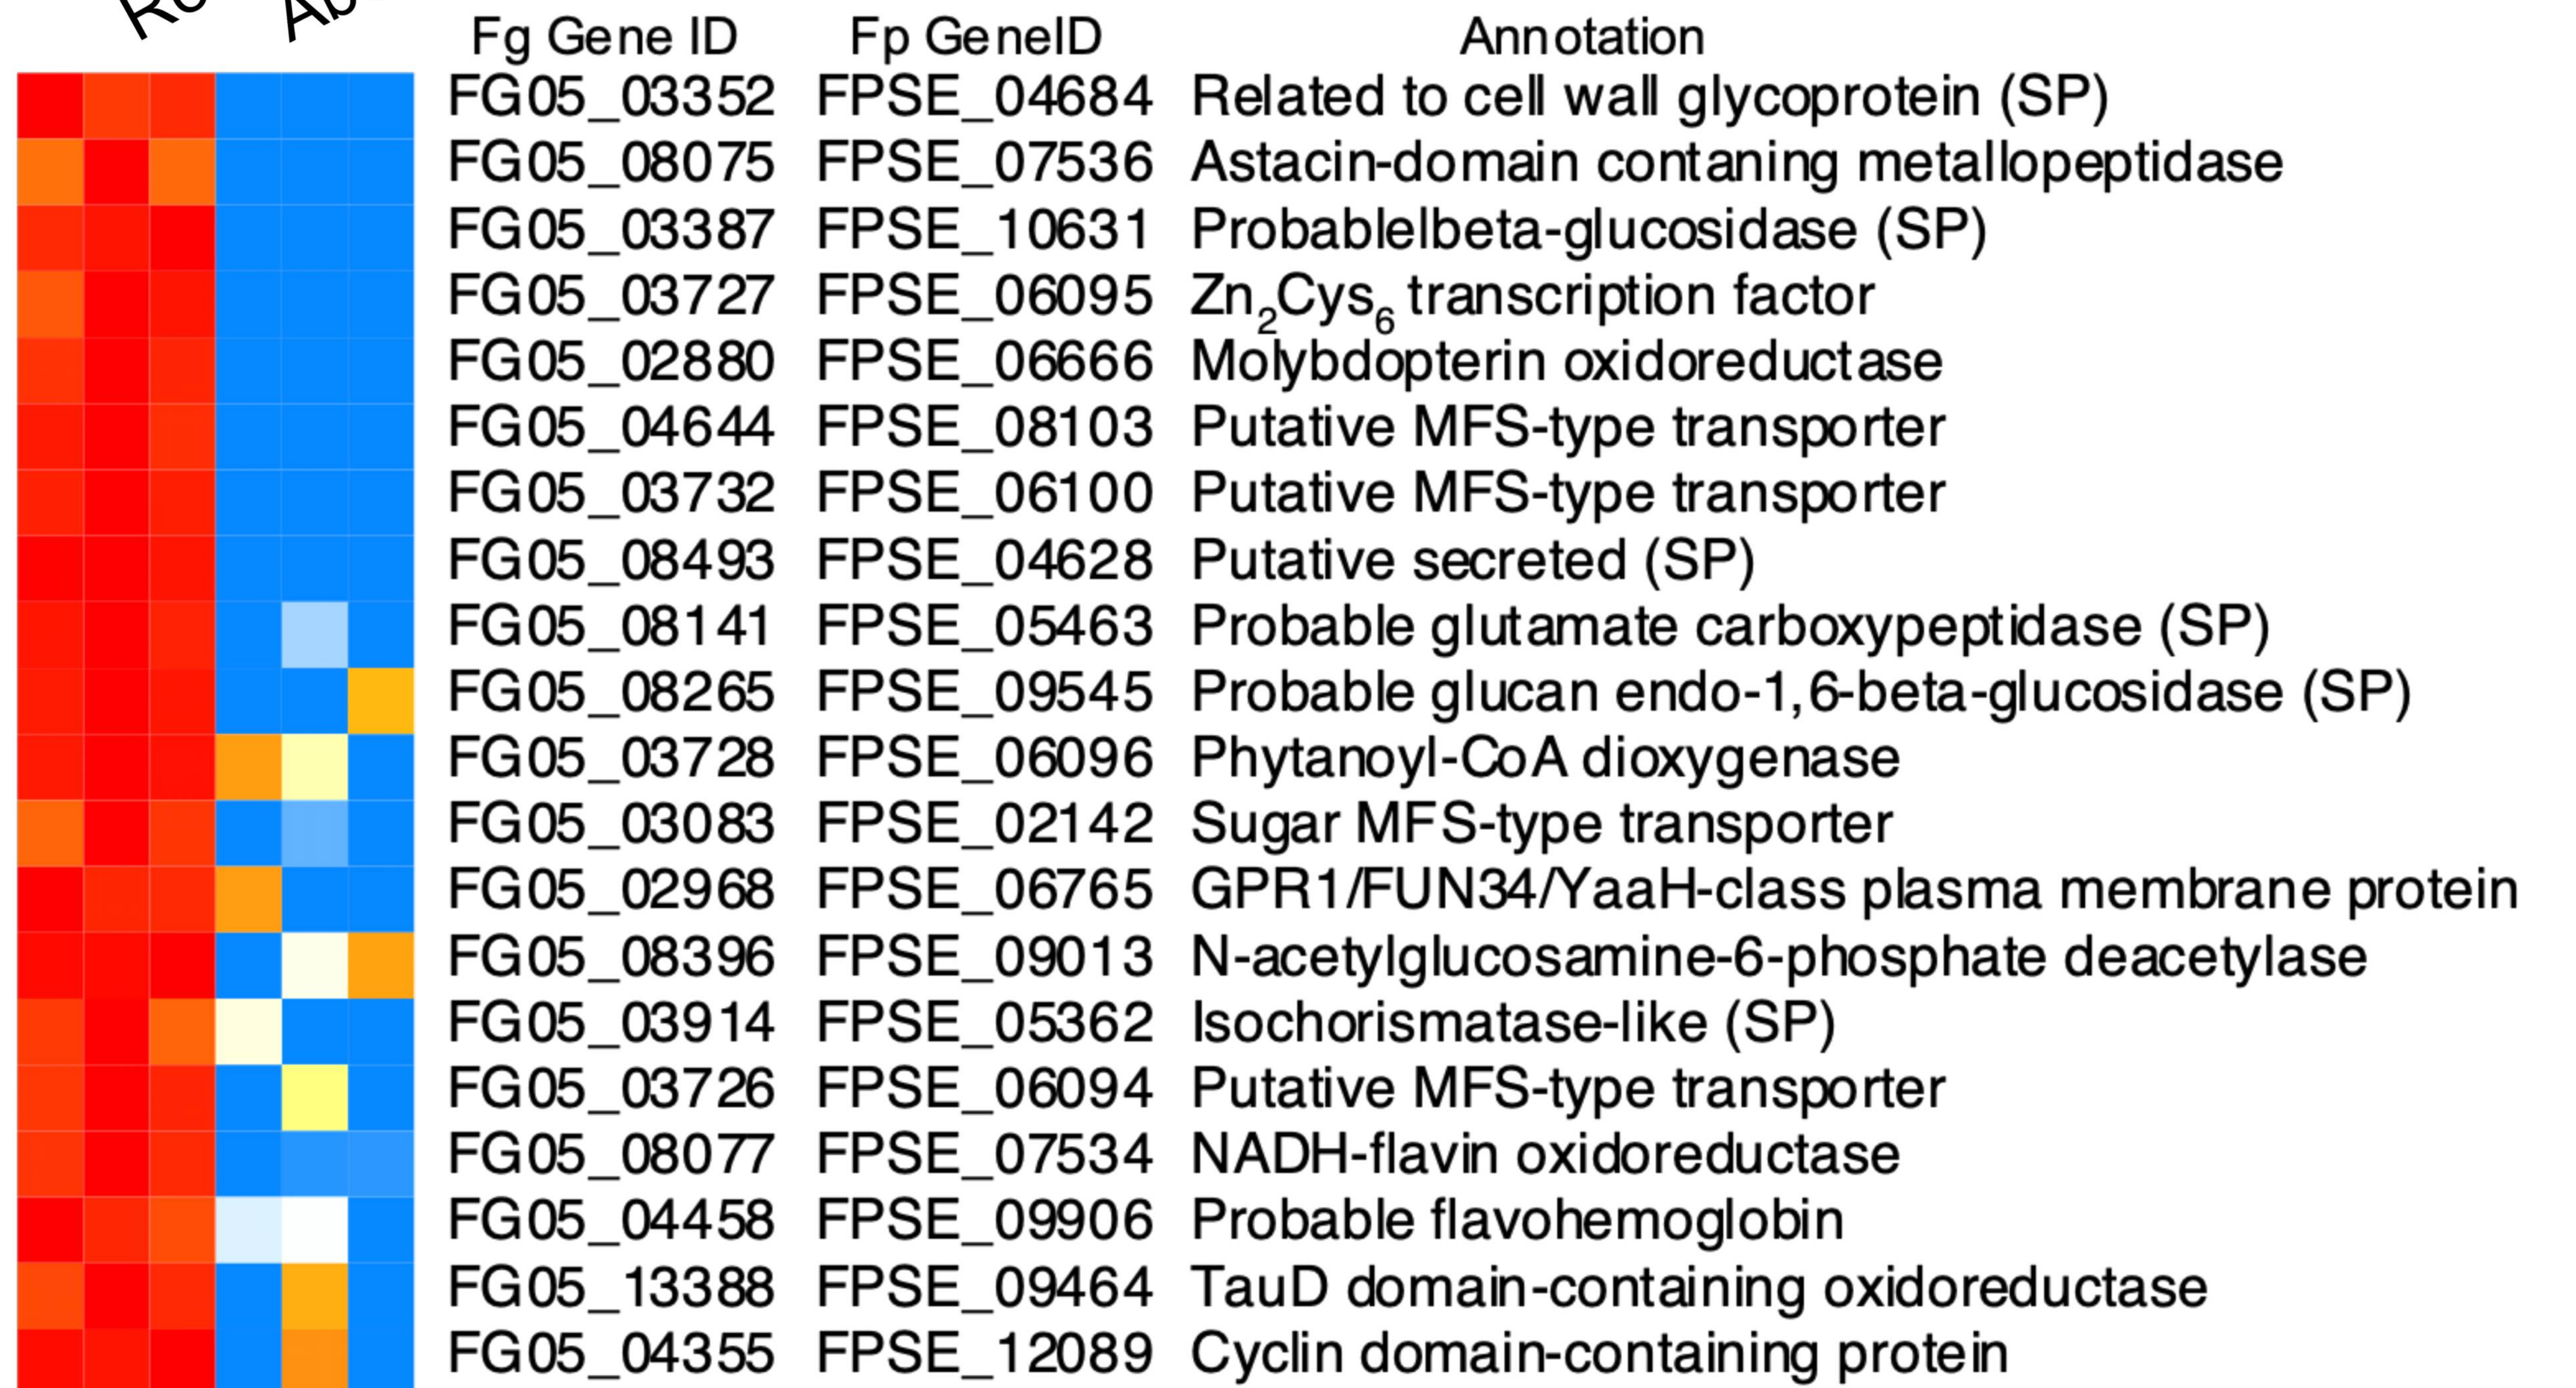



**A**Expression  $\log_2(\text{FPKM}+0.01)$ 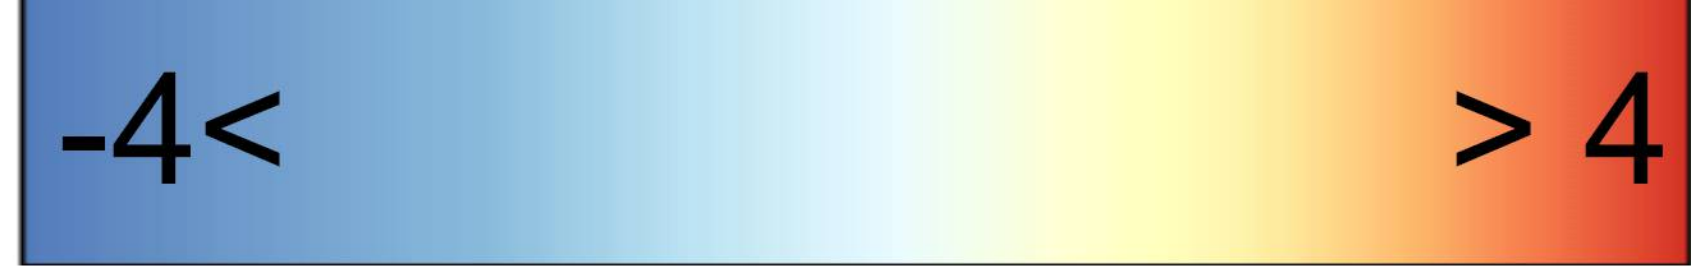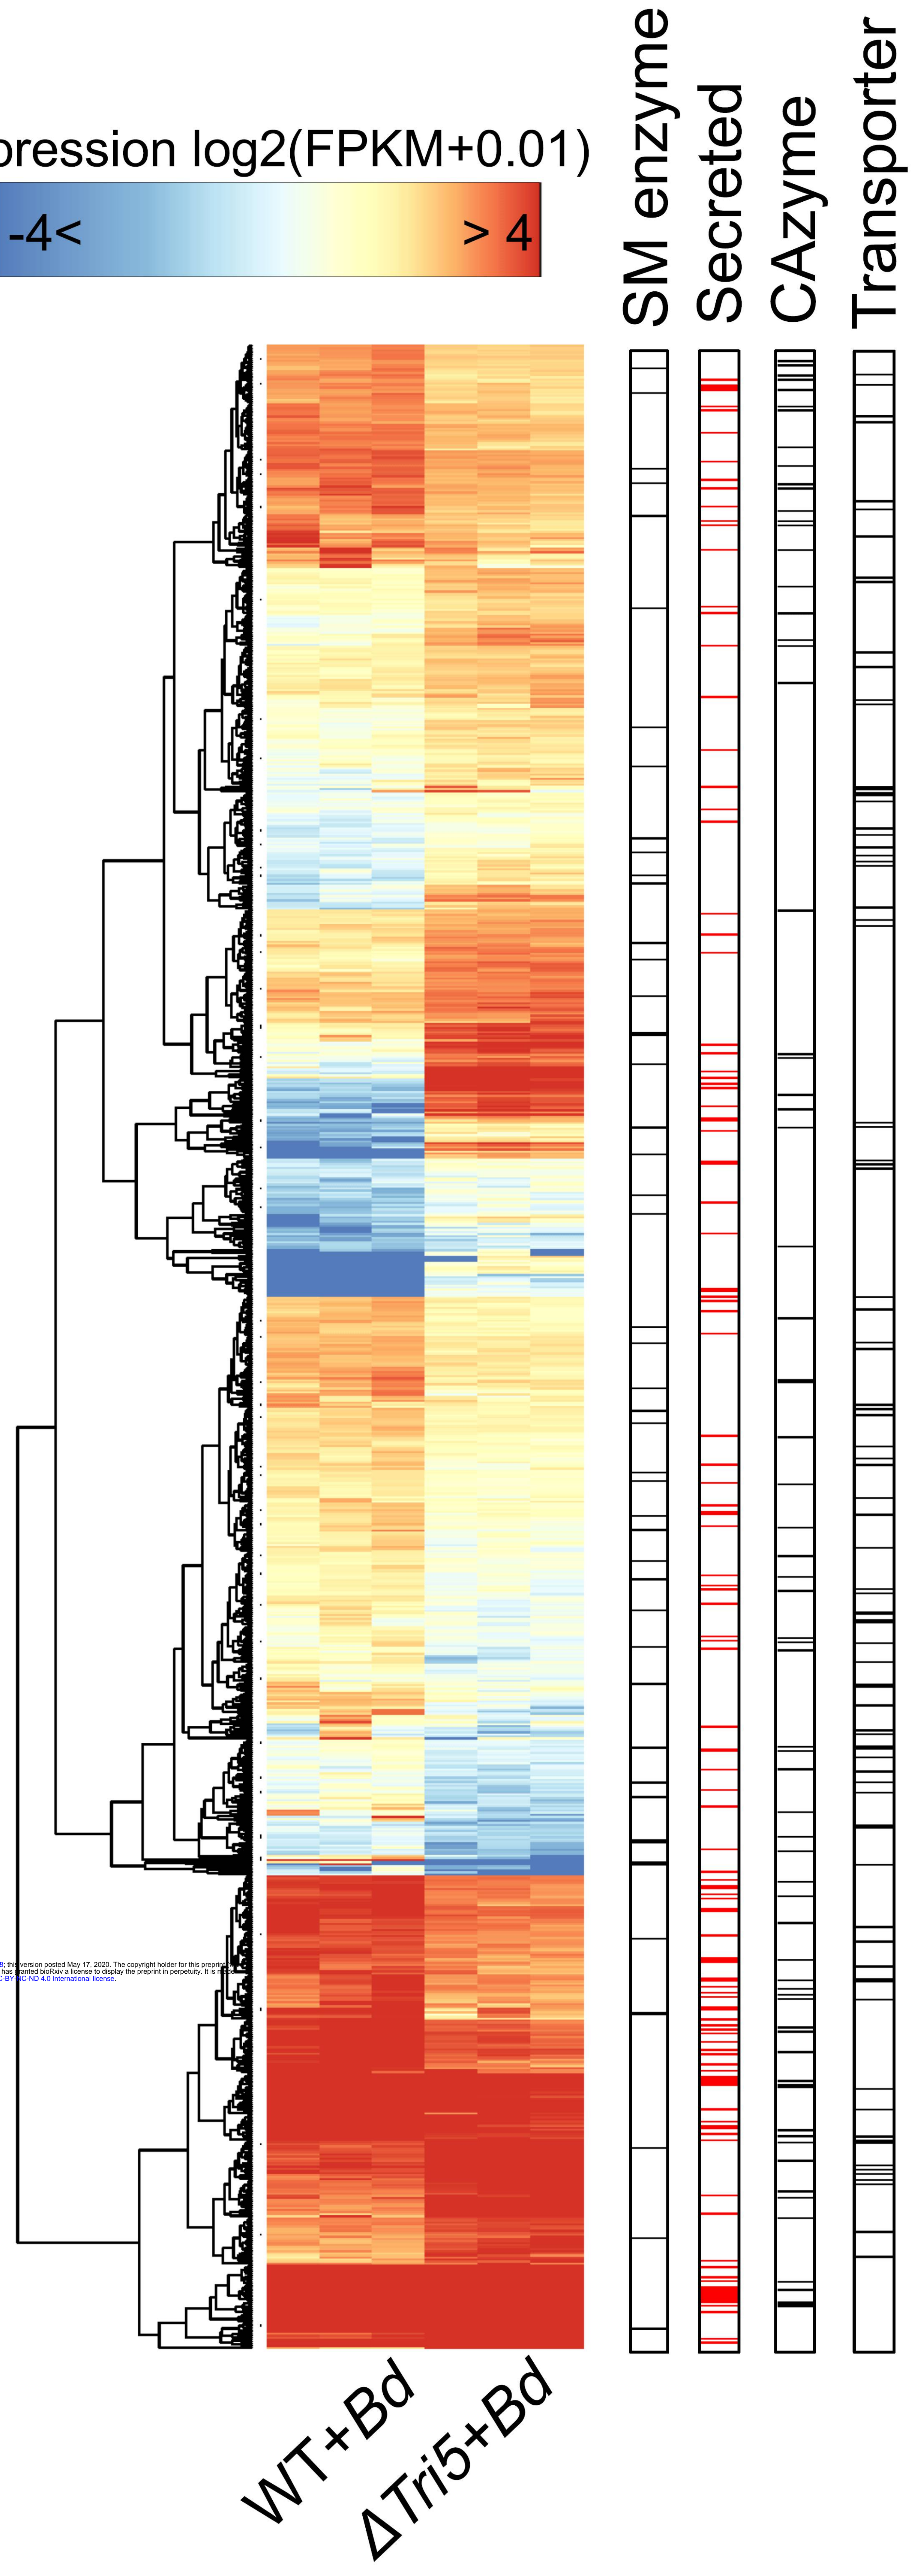**B**

- Hemicellulose
- Pectin
- Lignin
- Hemicellulose\_or\_pectin\_side\_chains
- Cellulose

**CAzyme**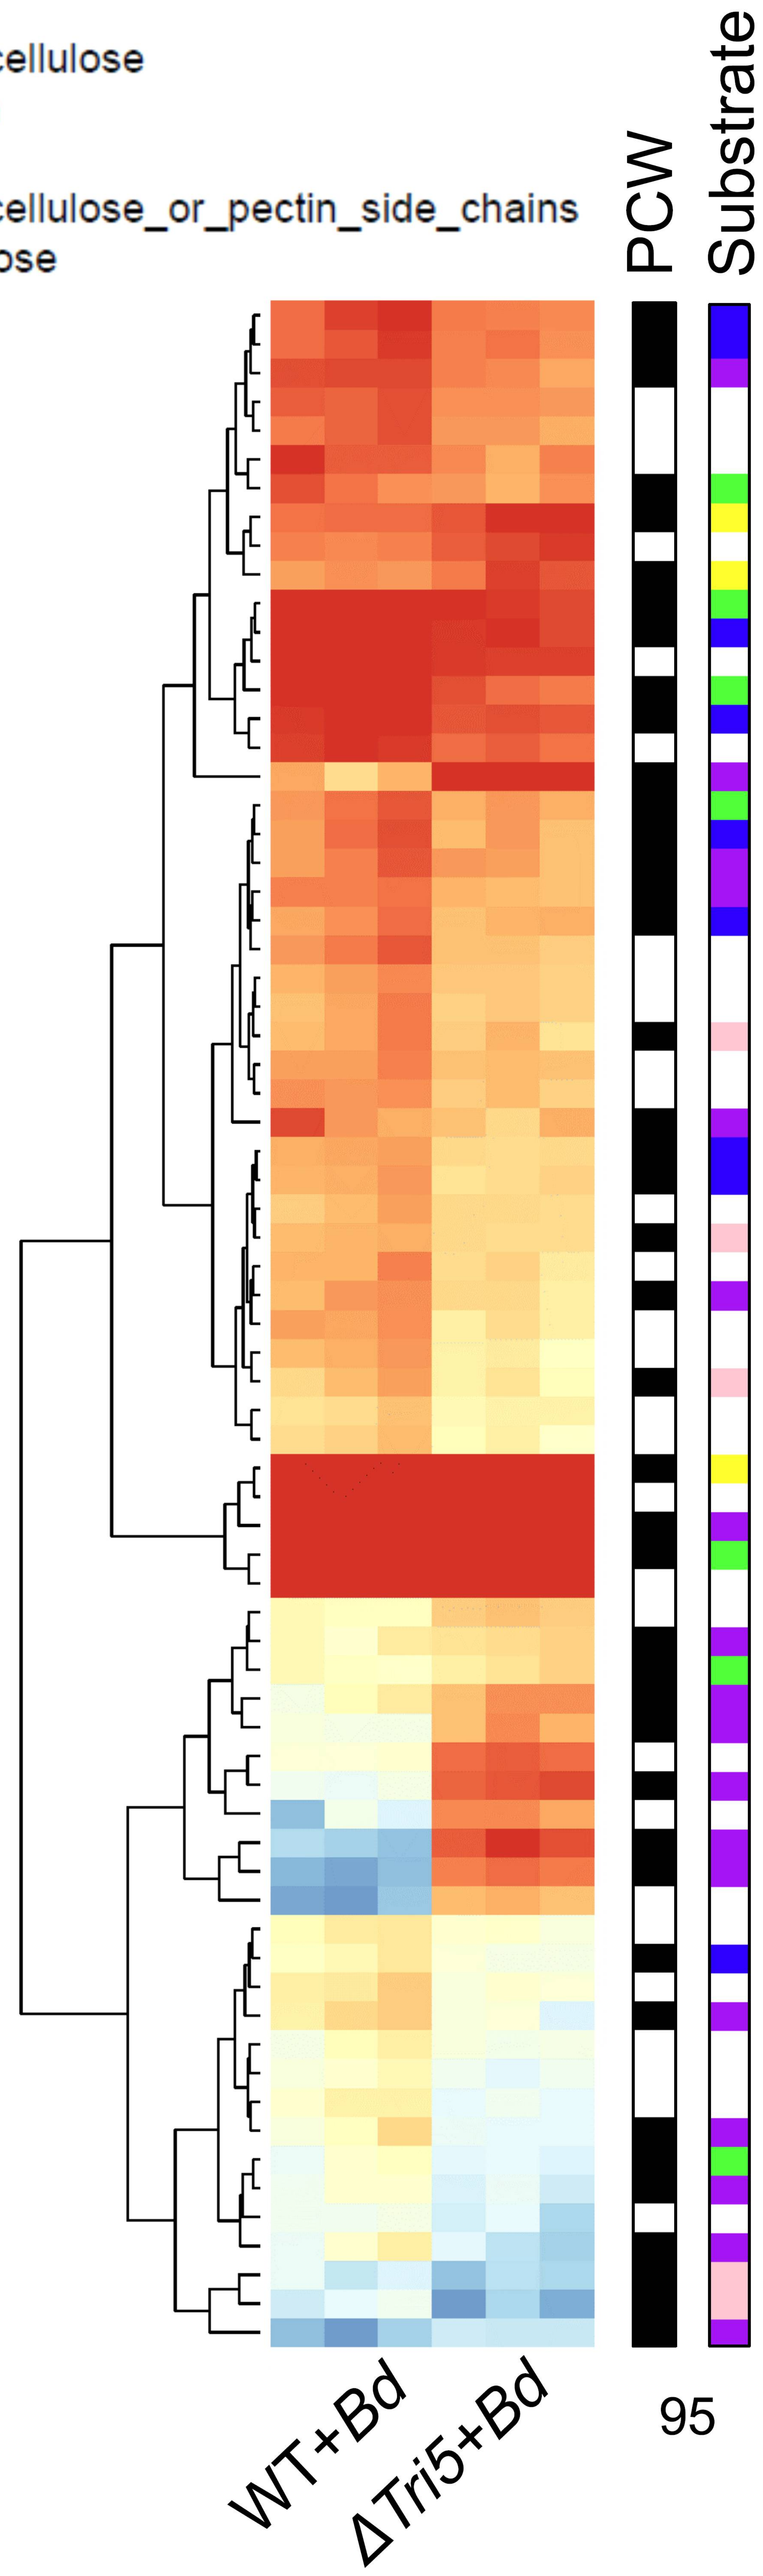**C****Secreted**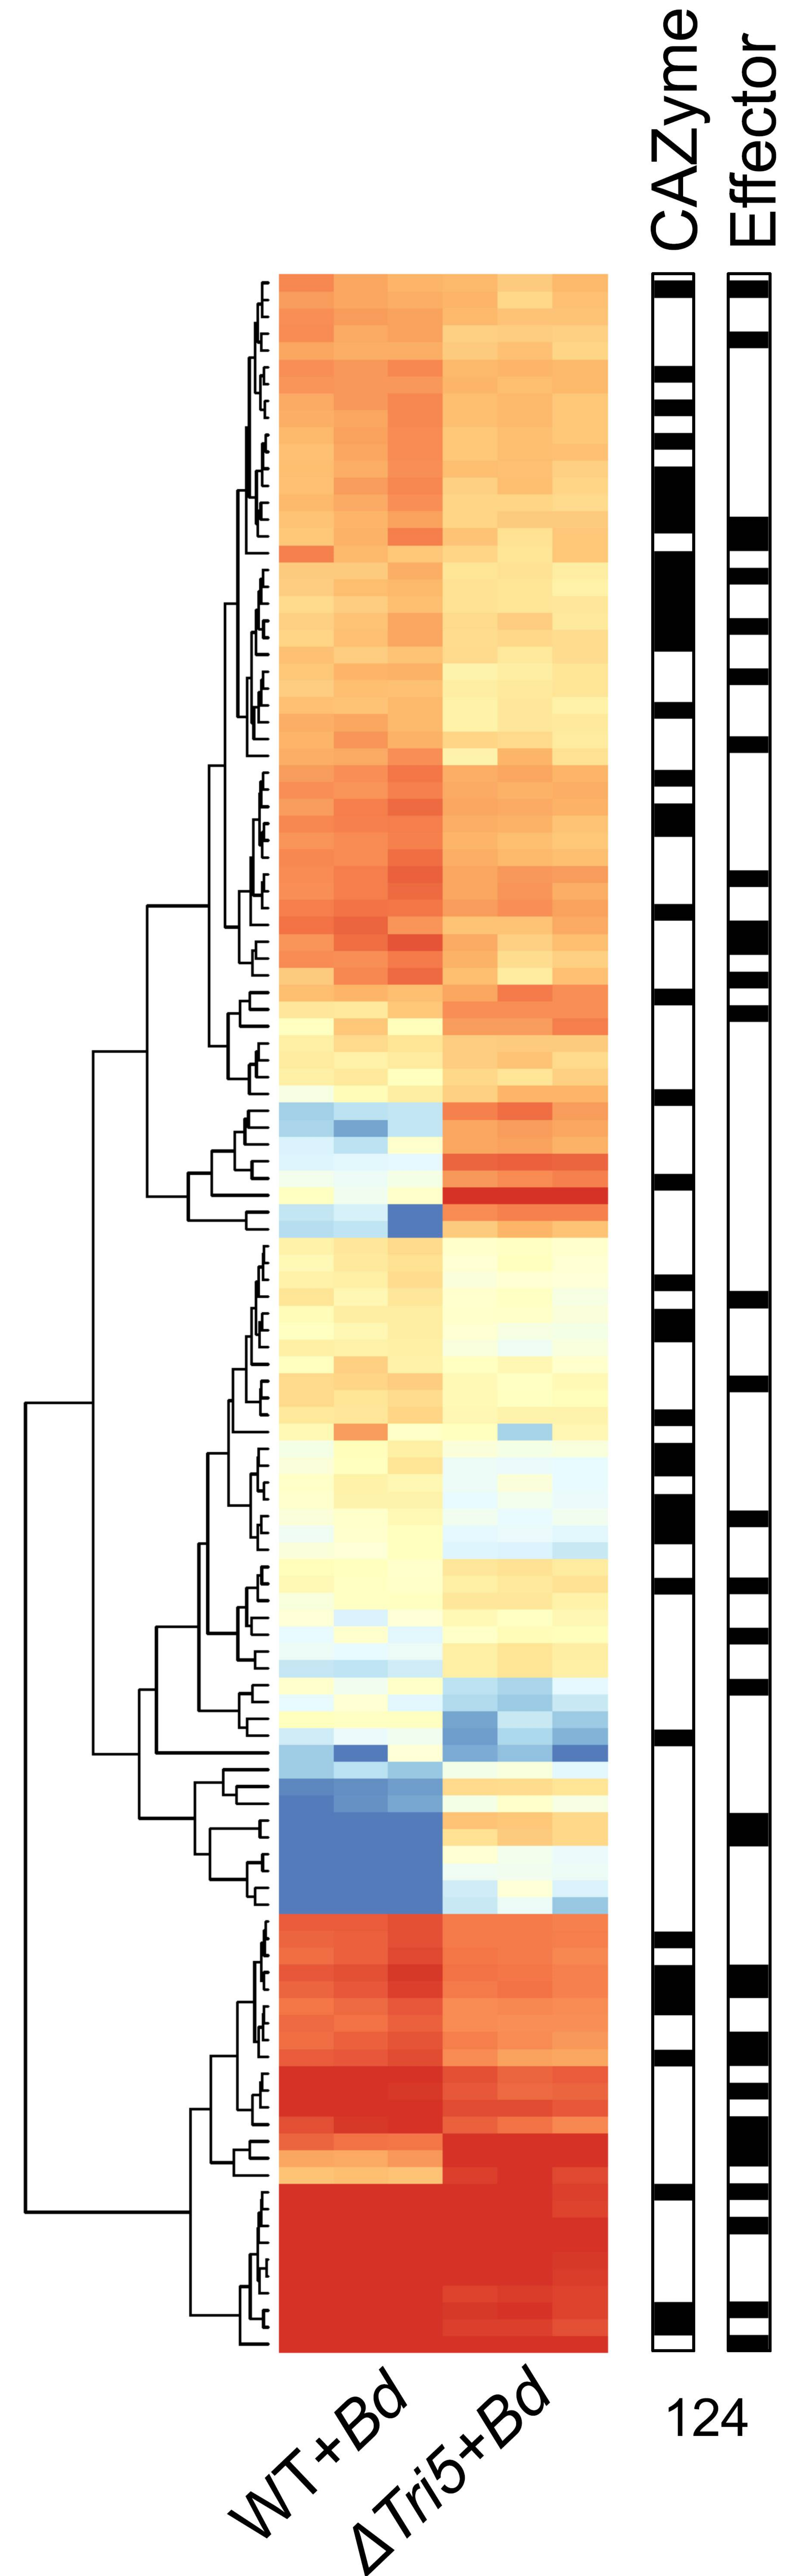



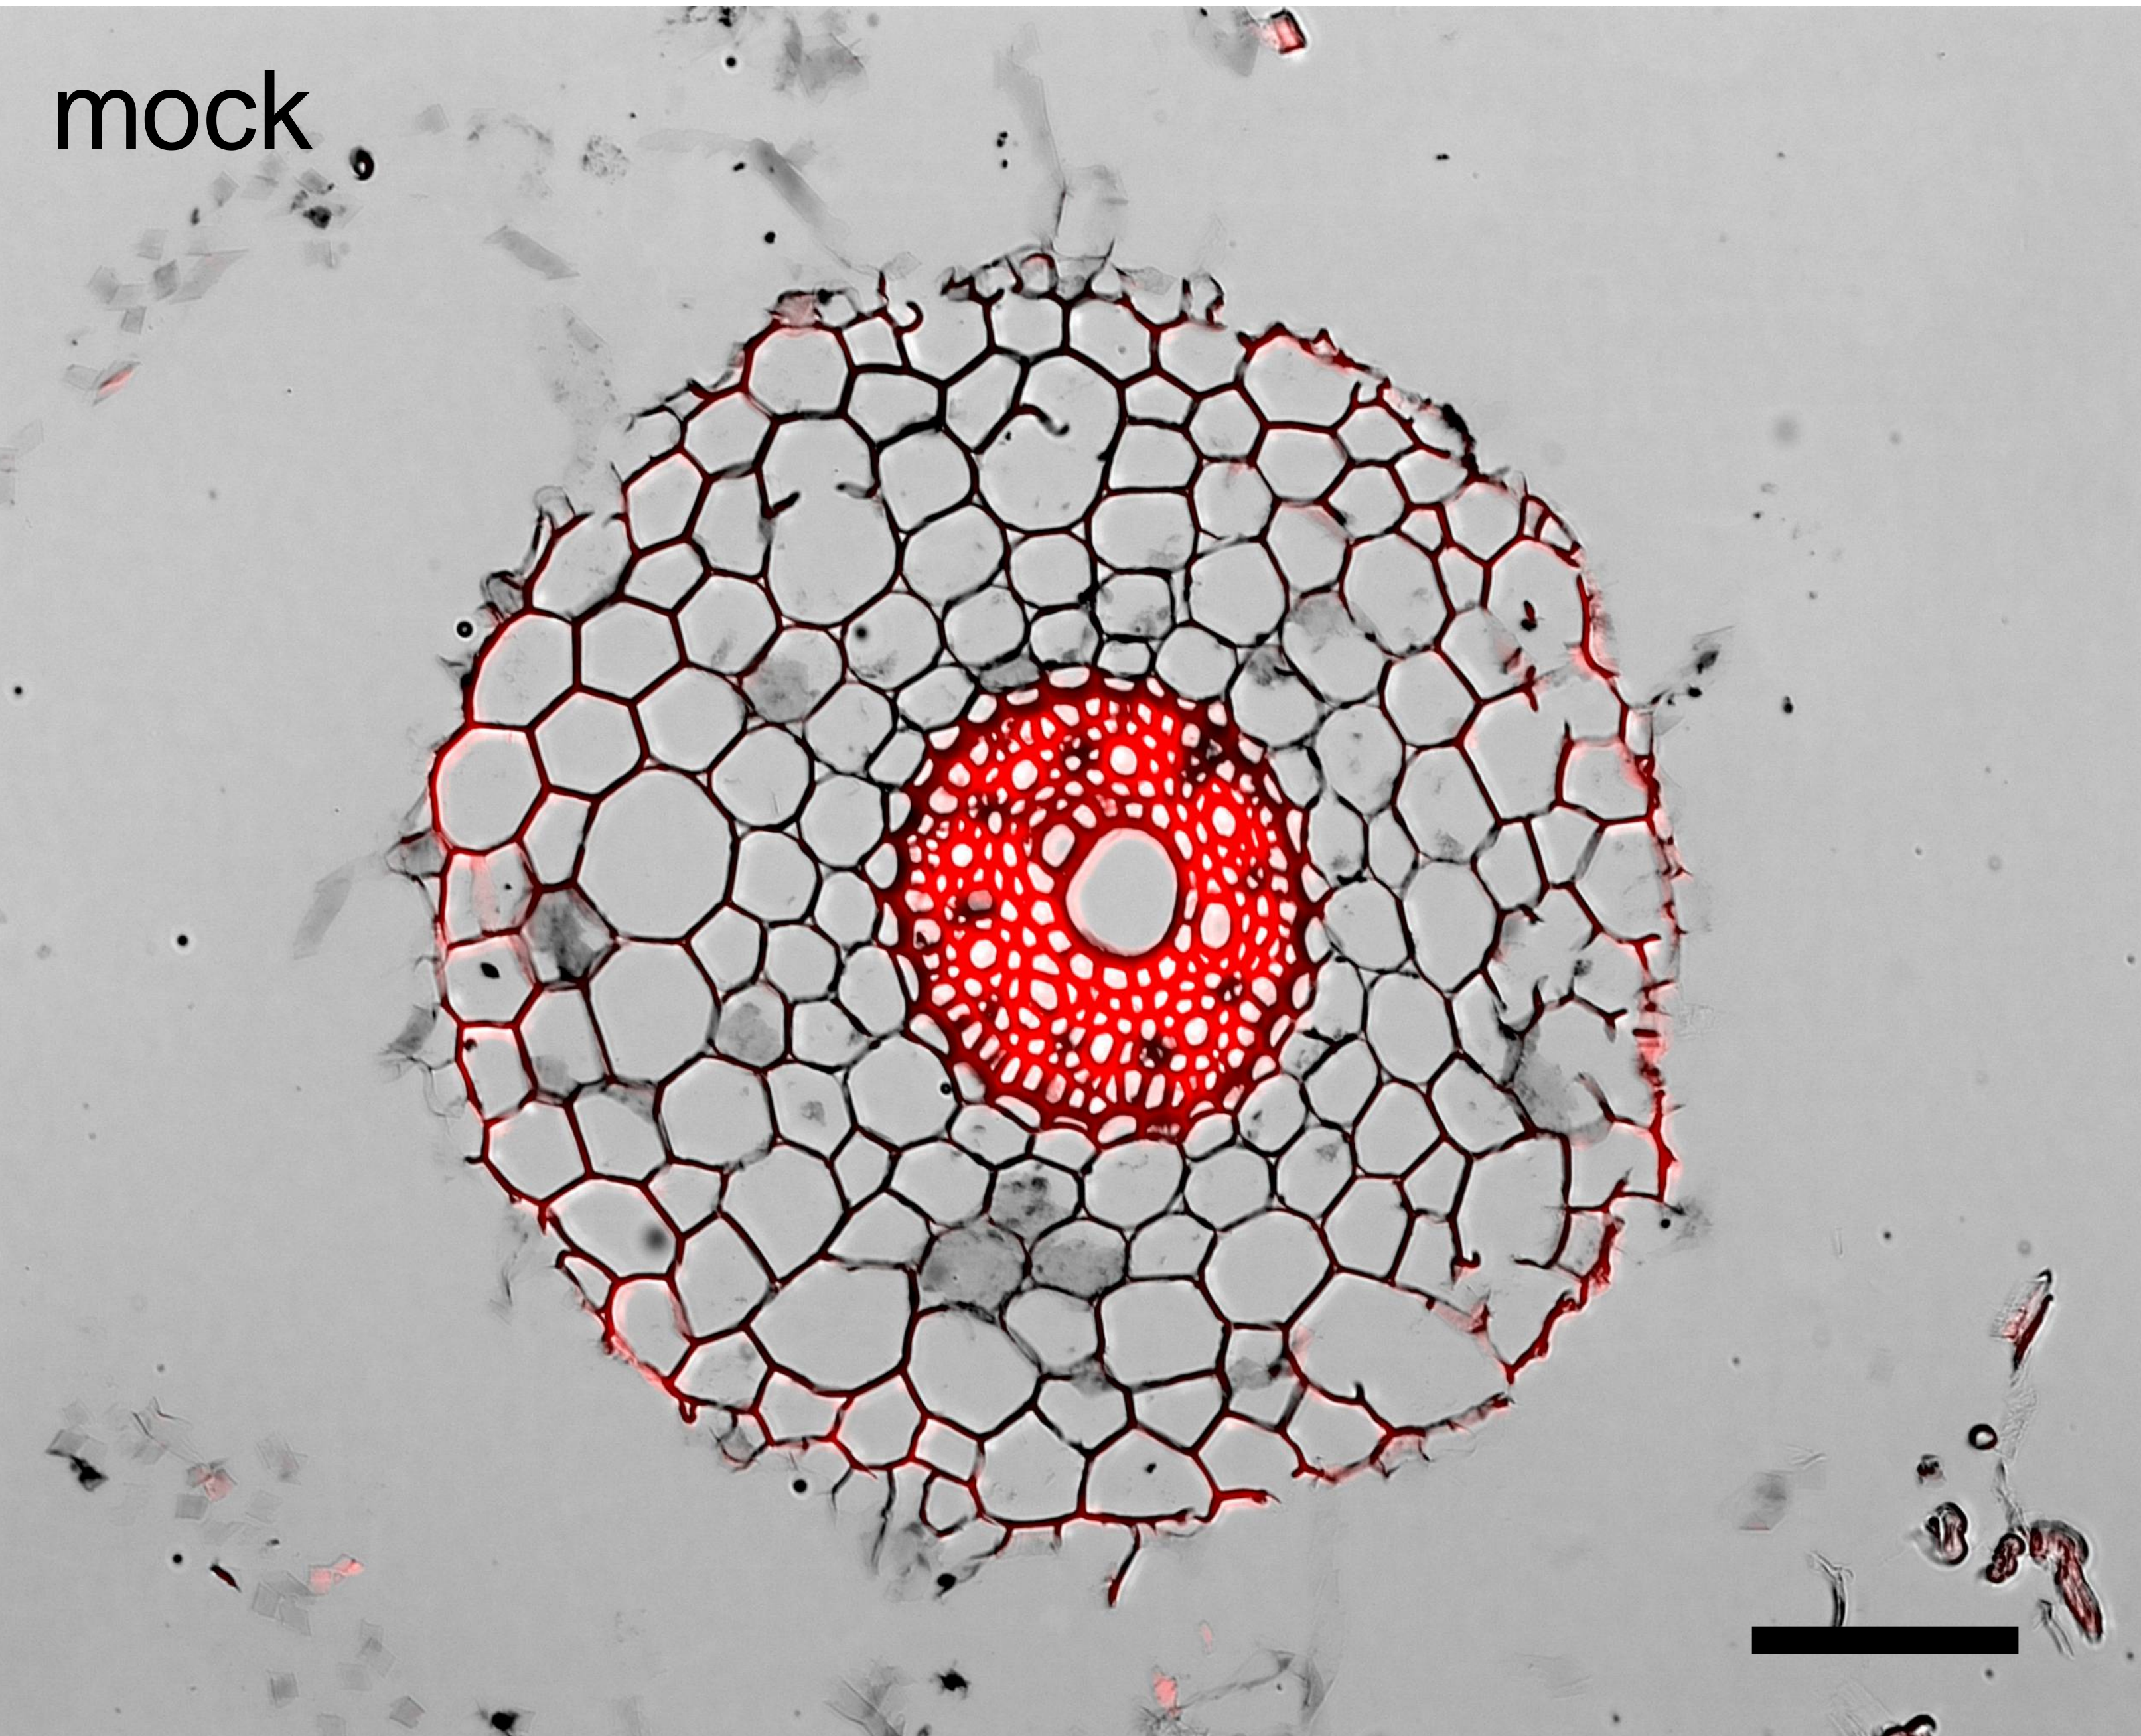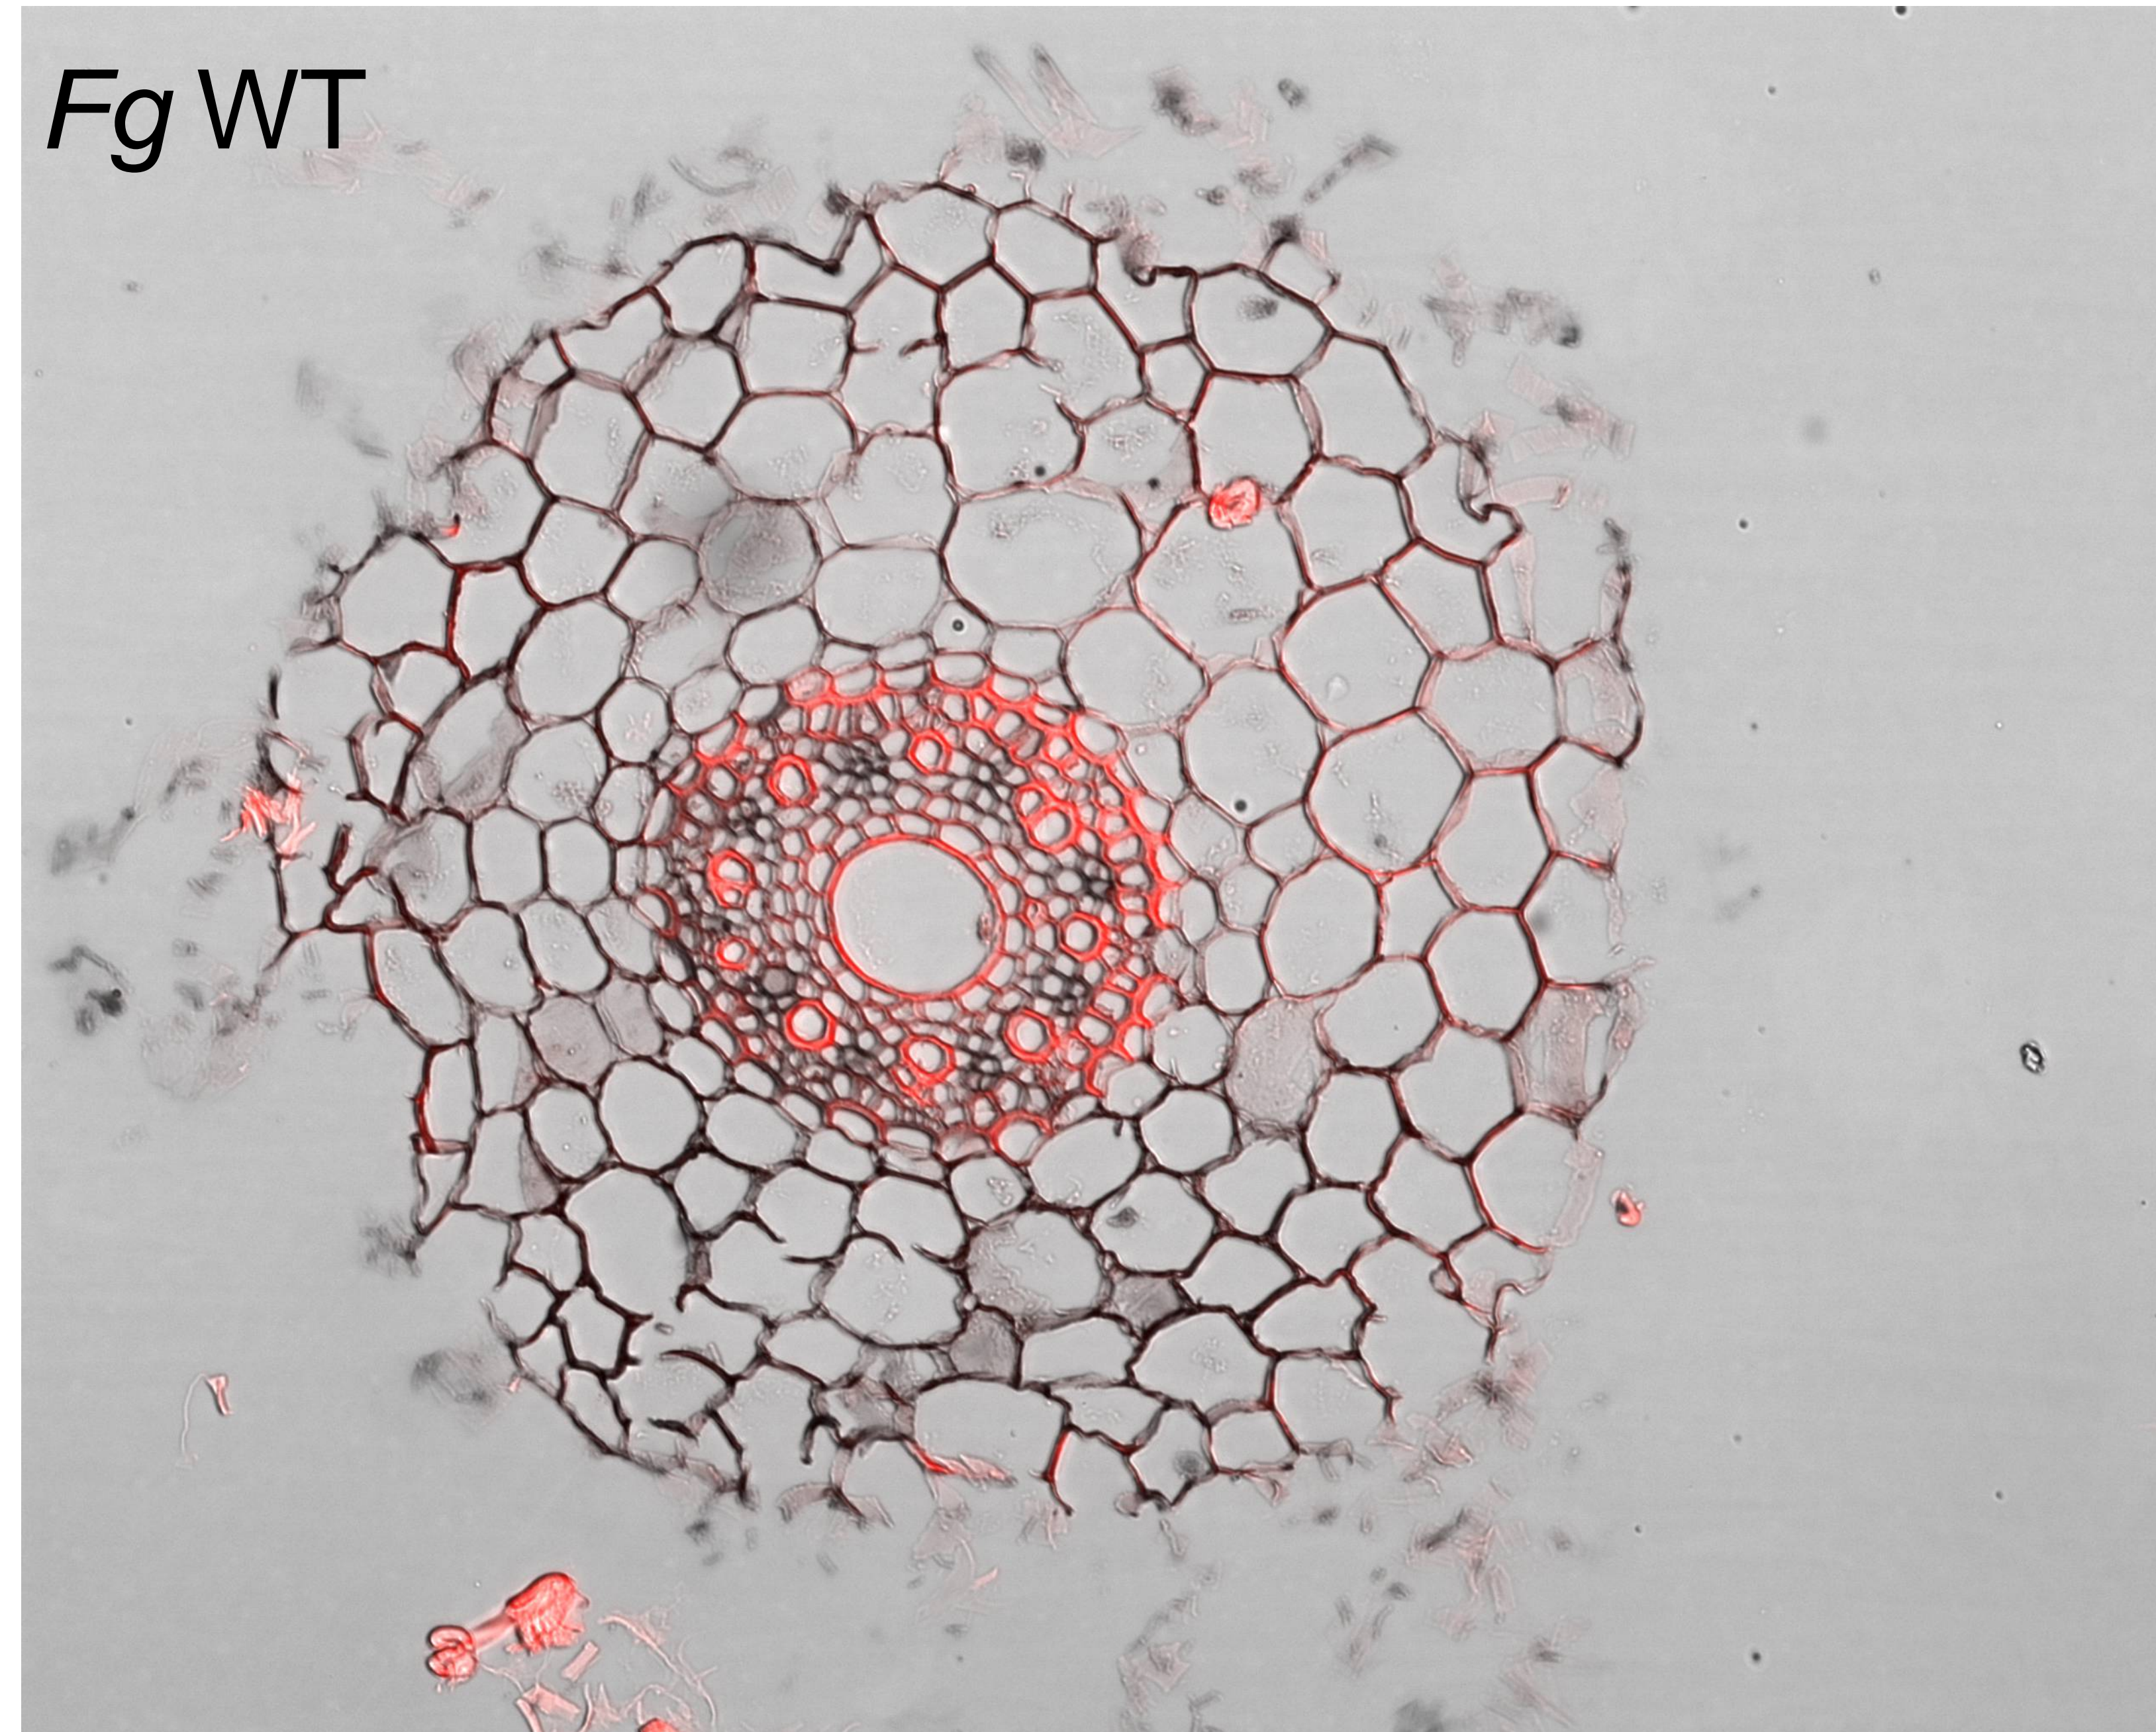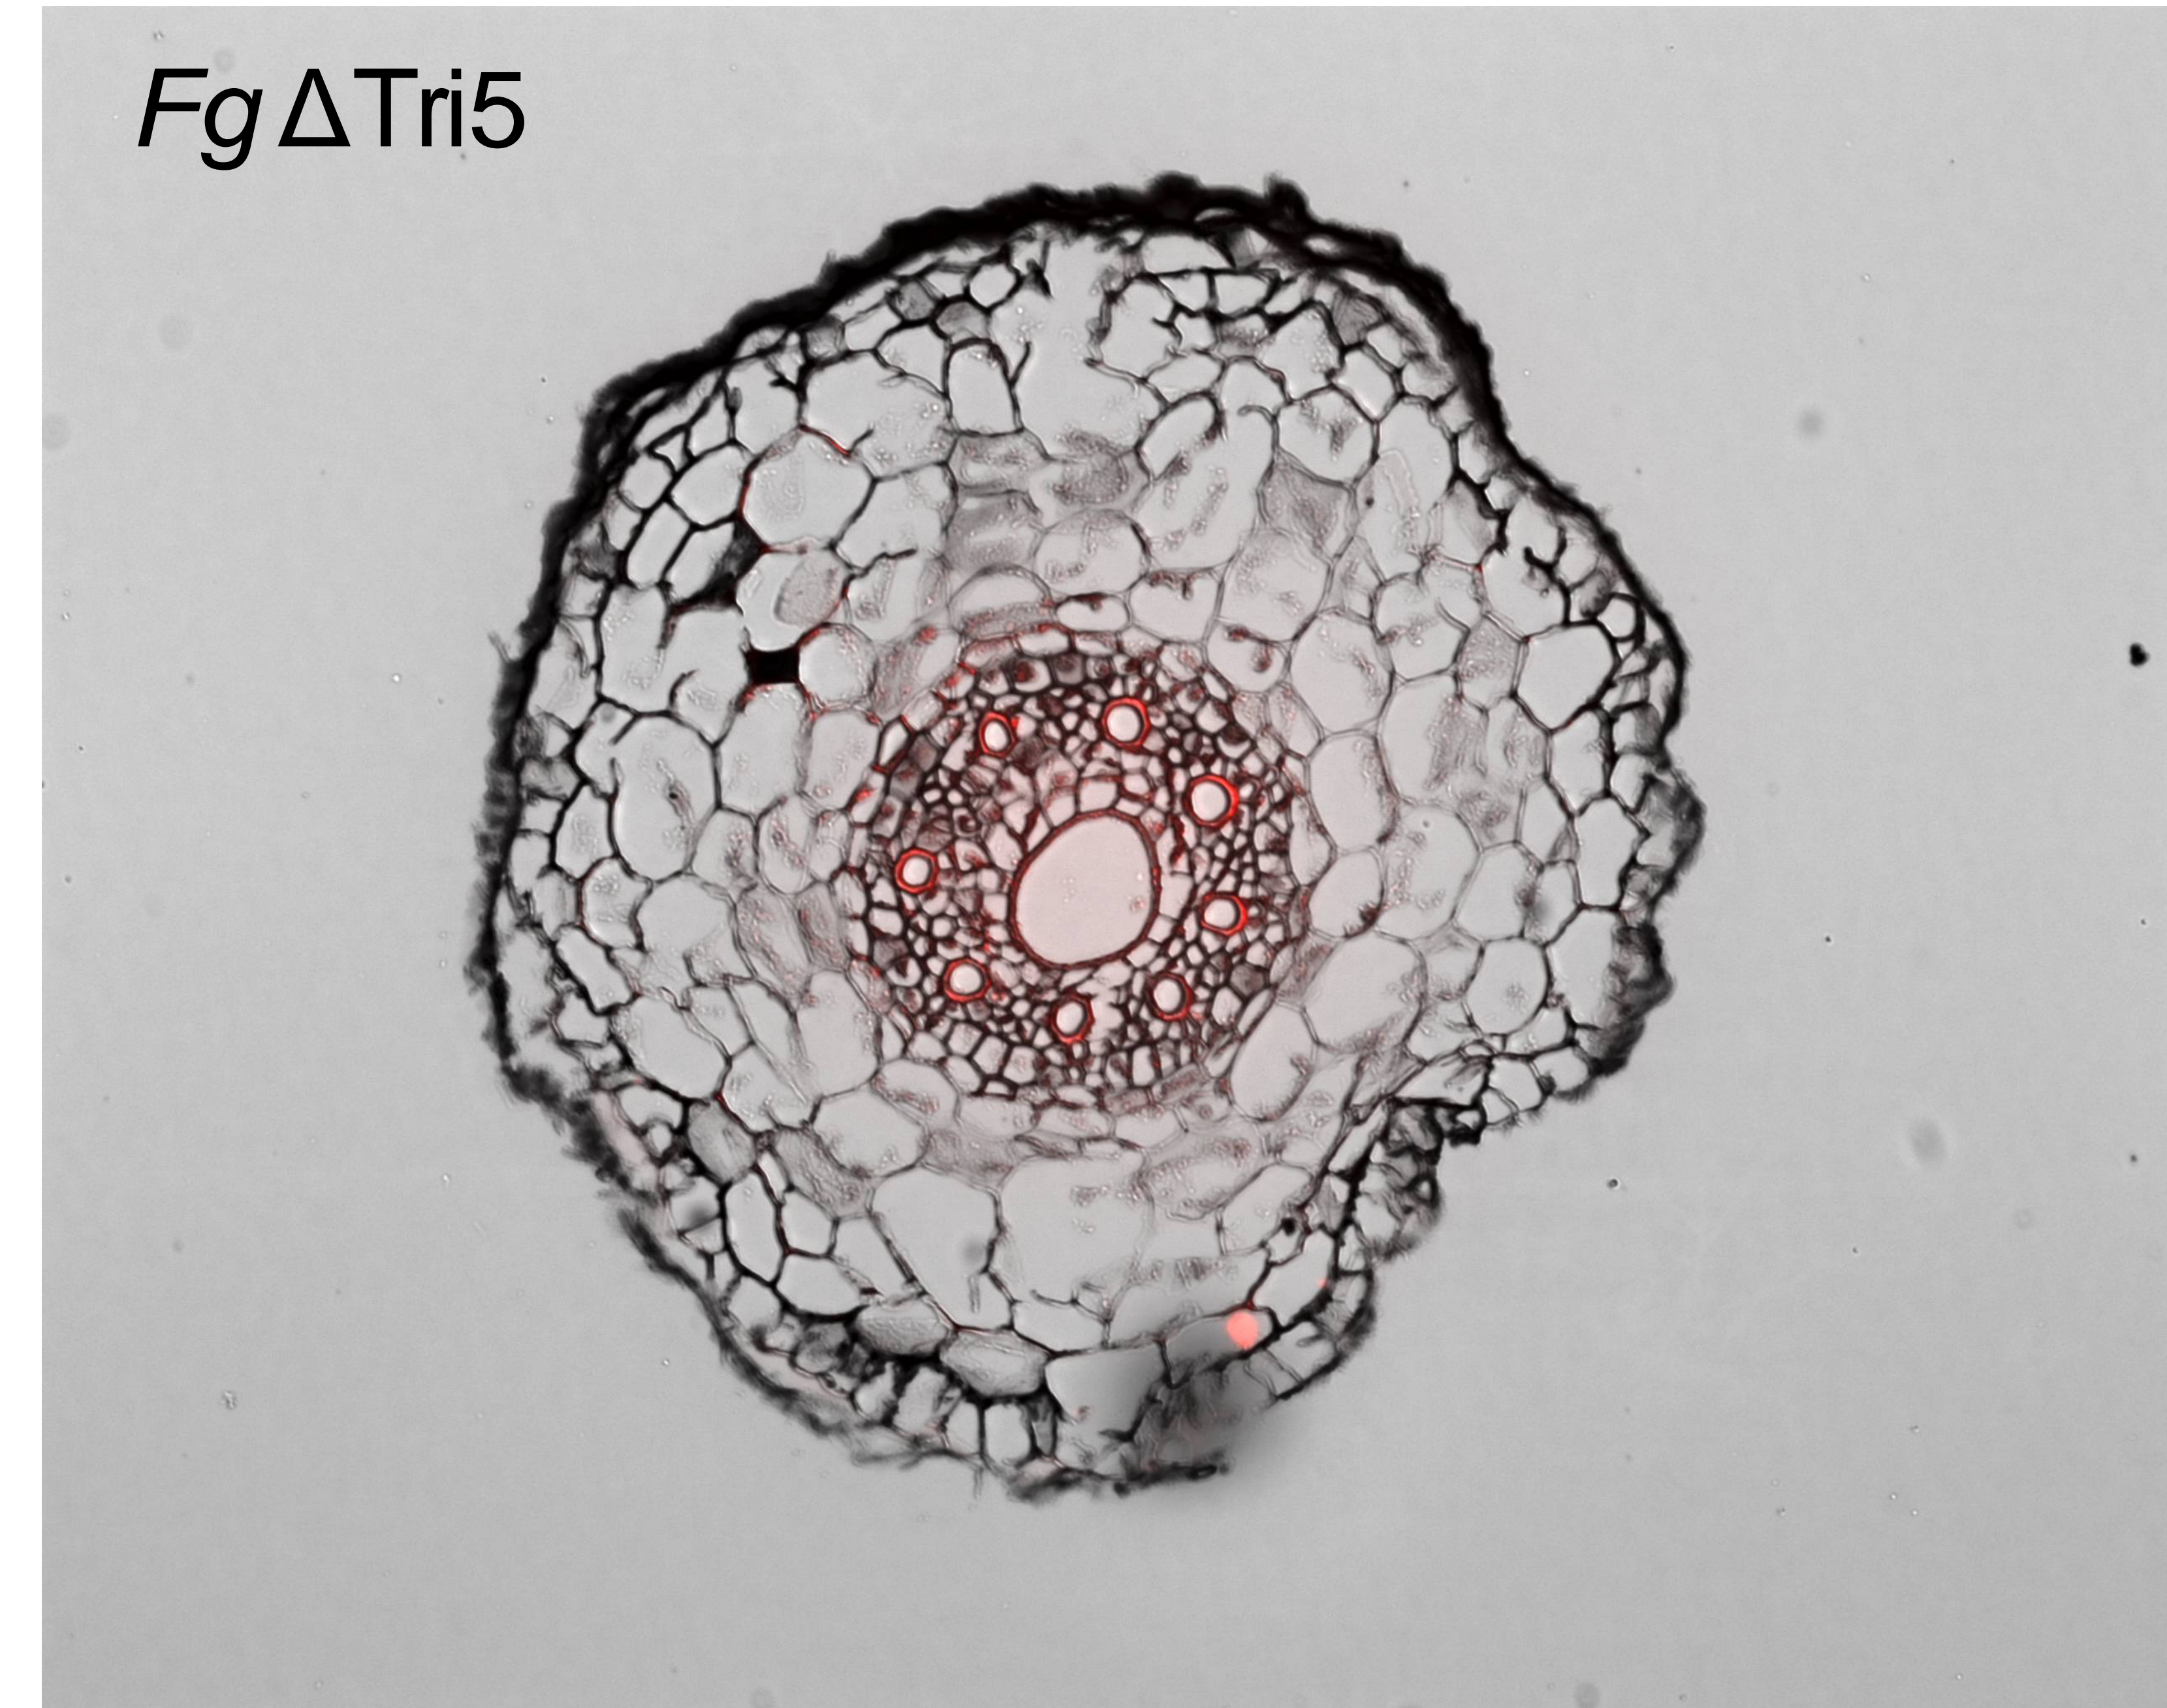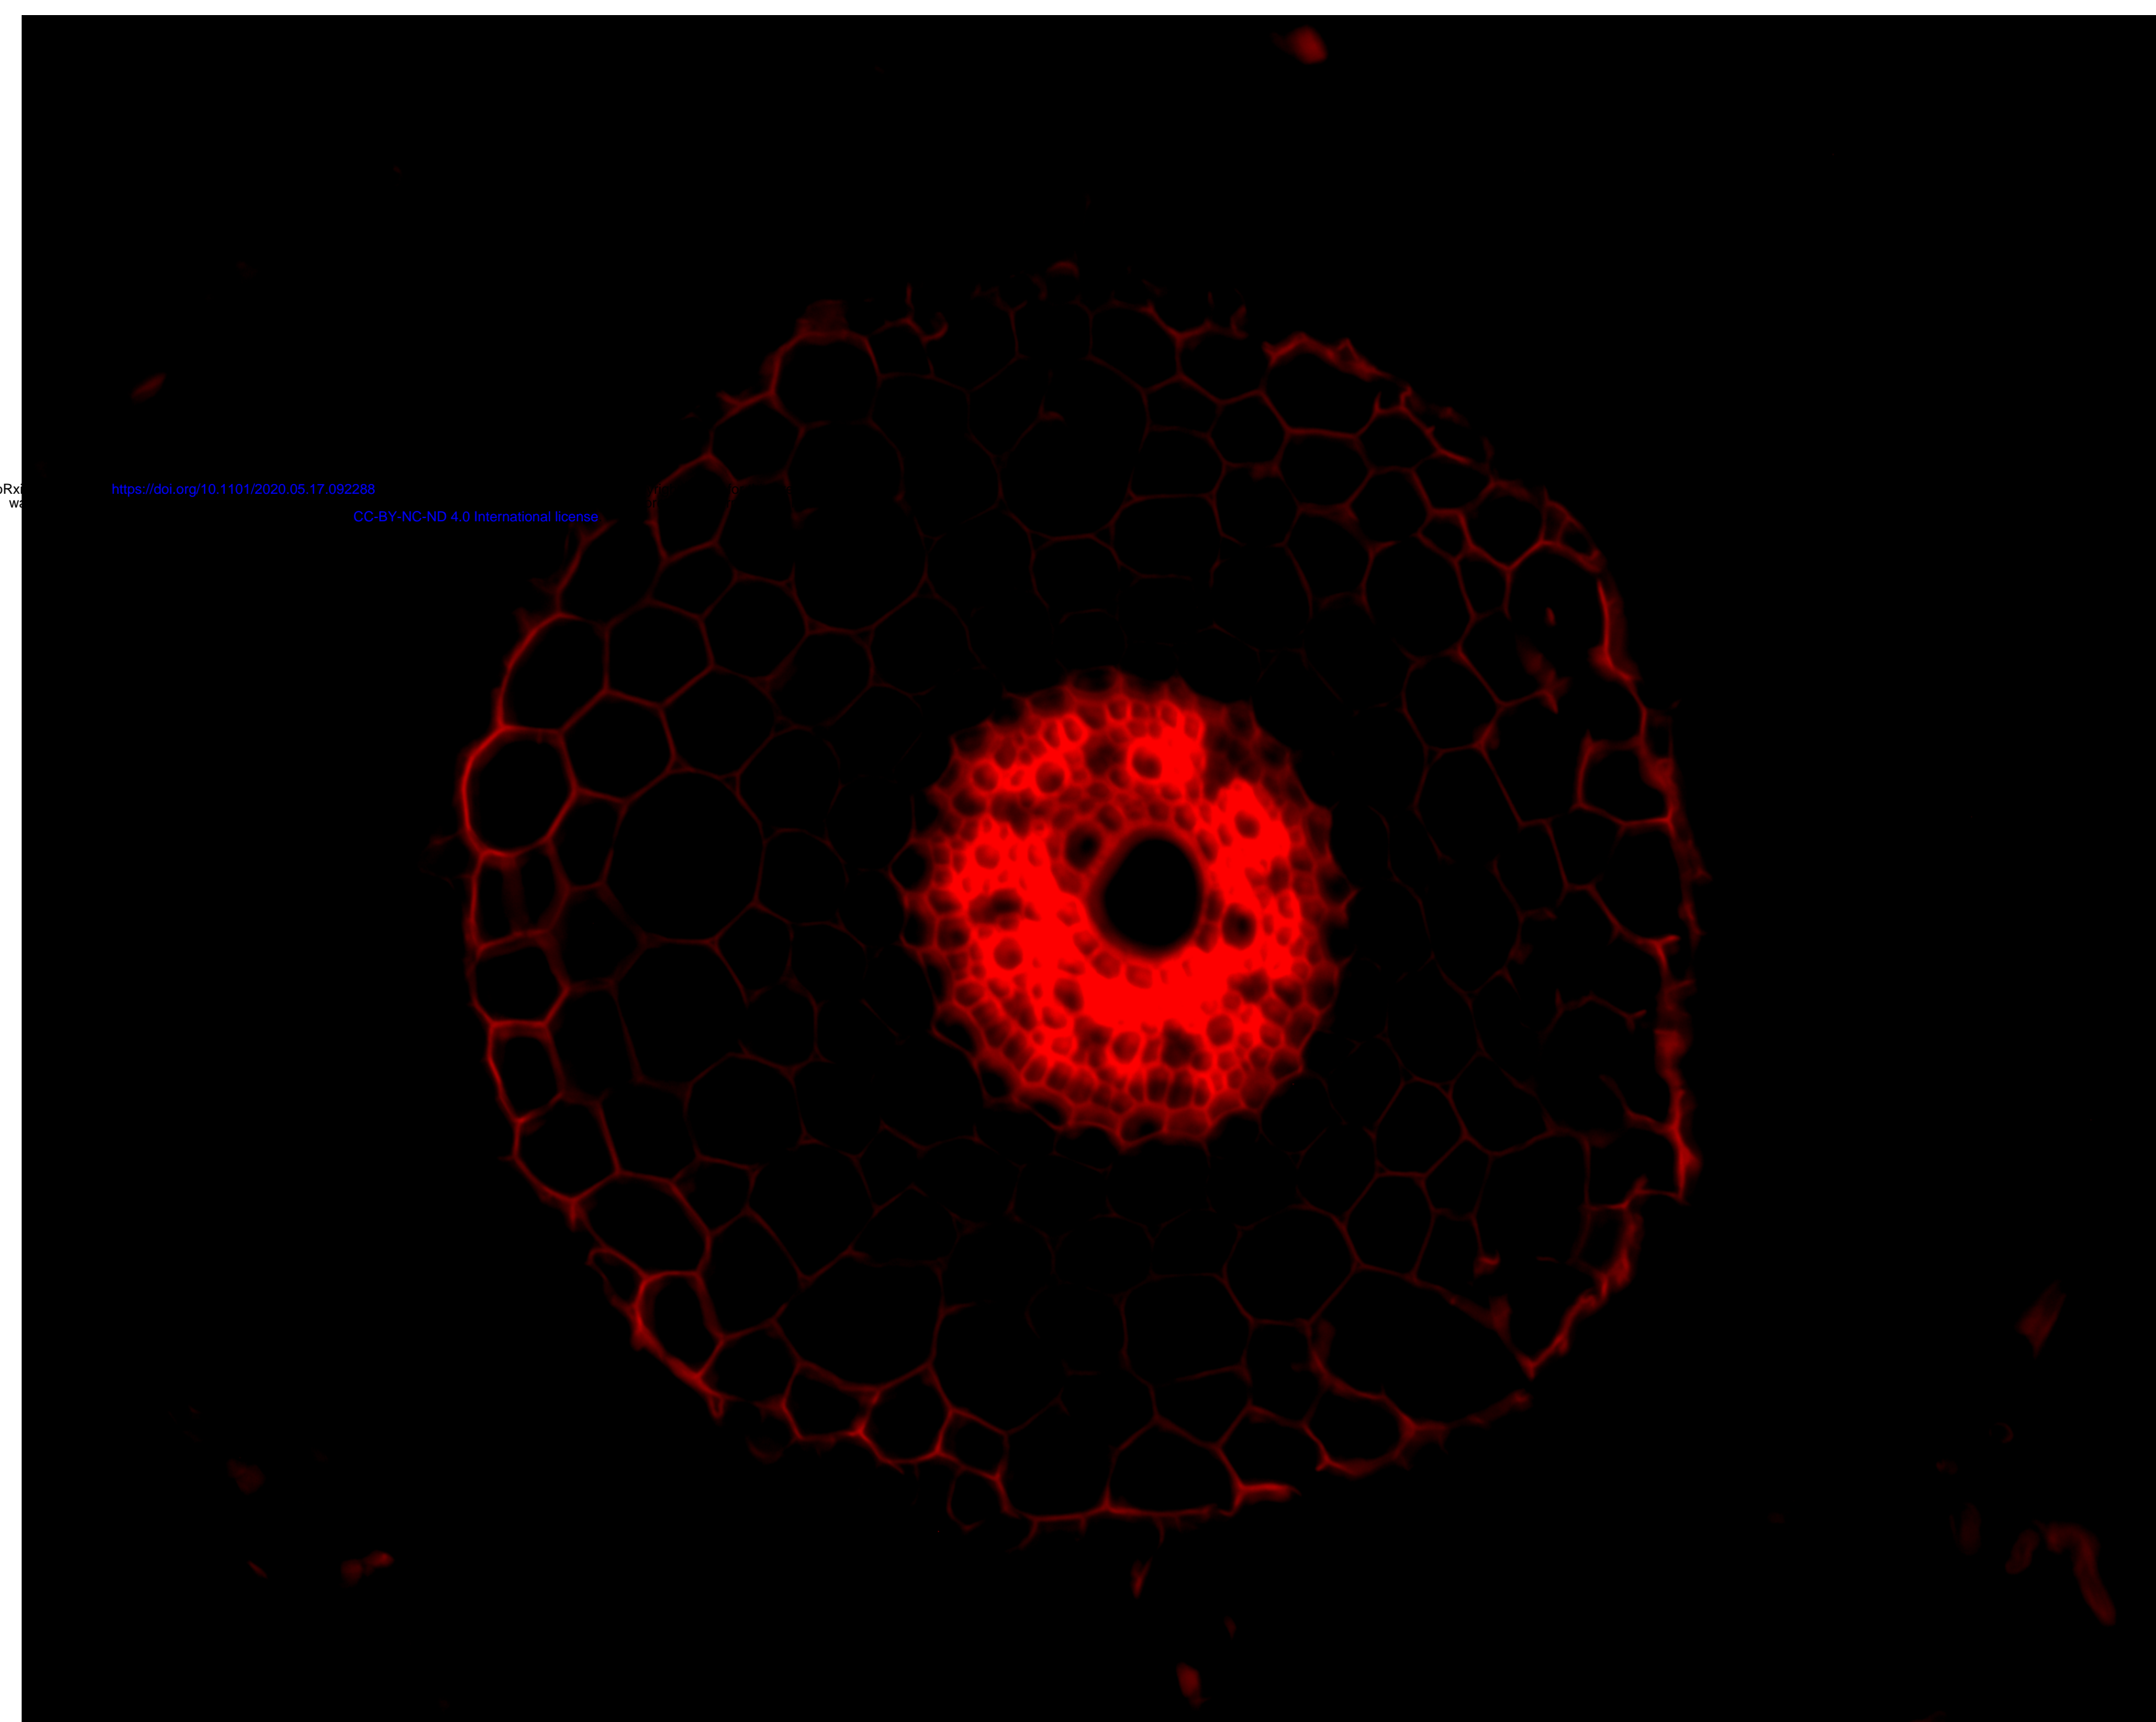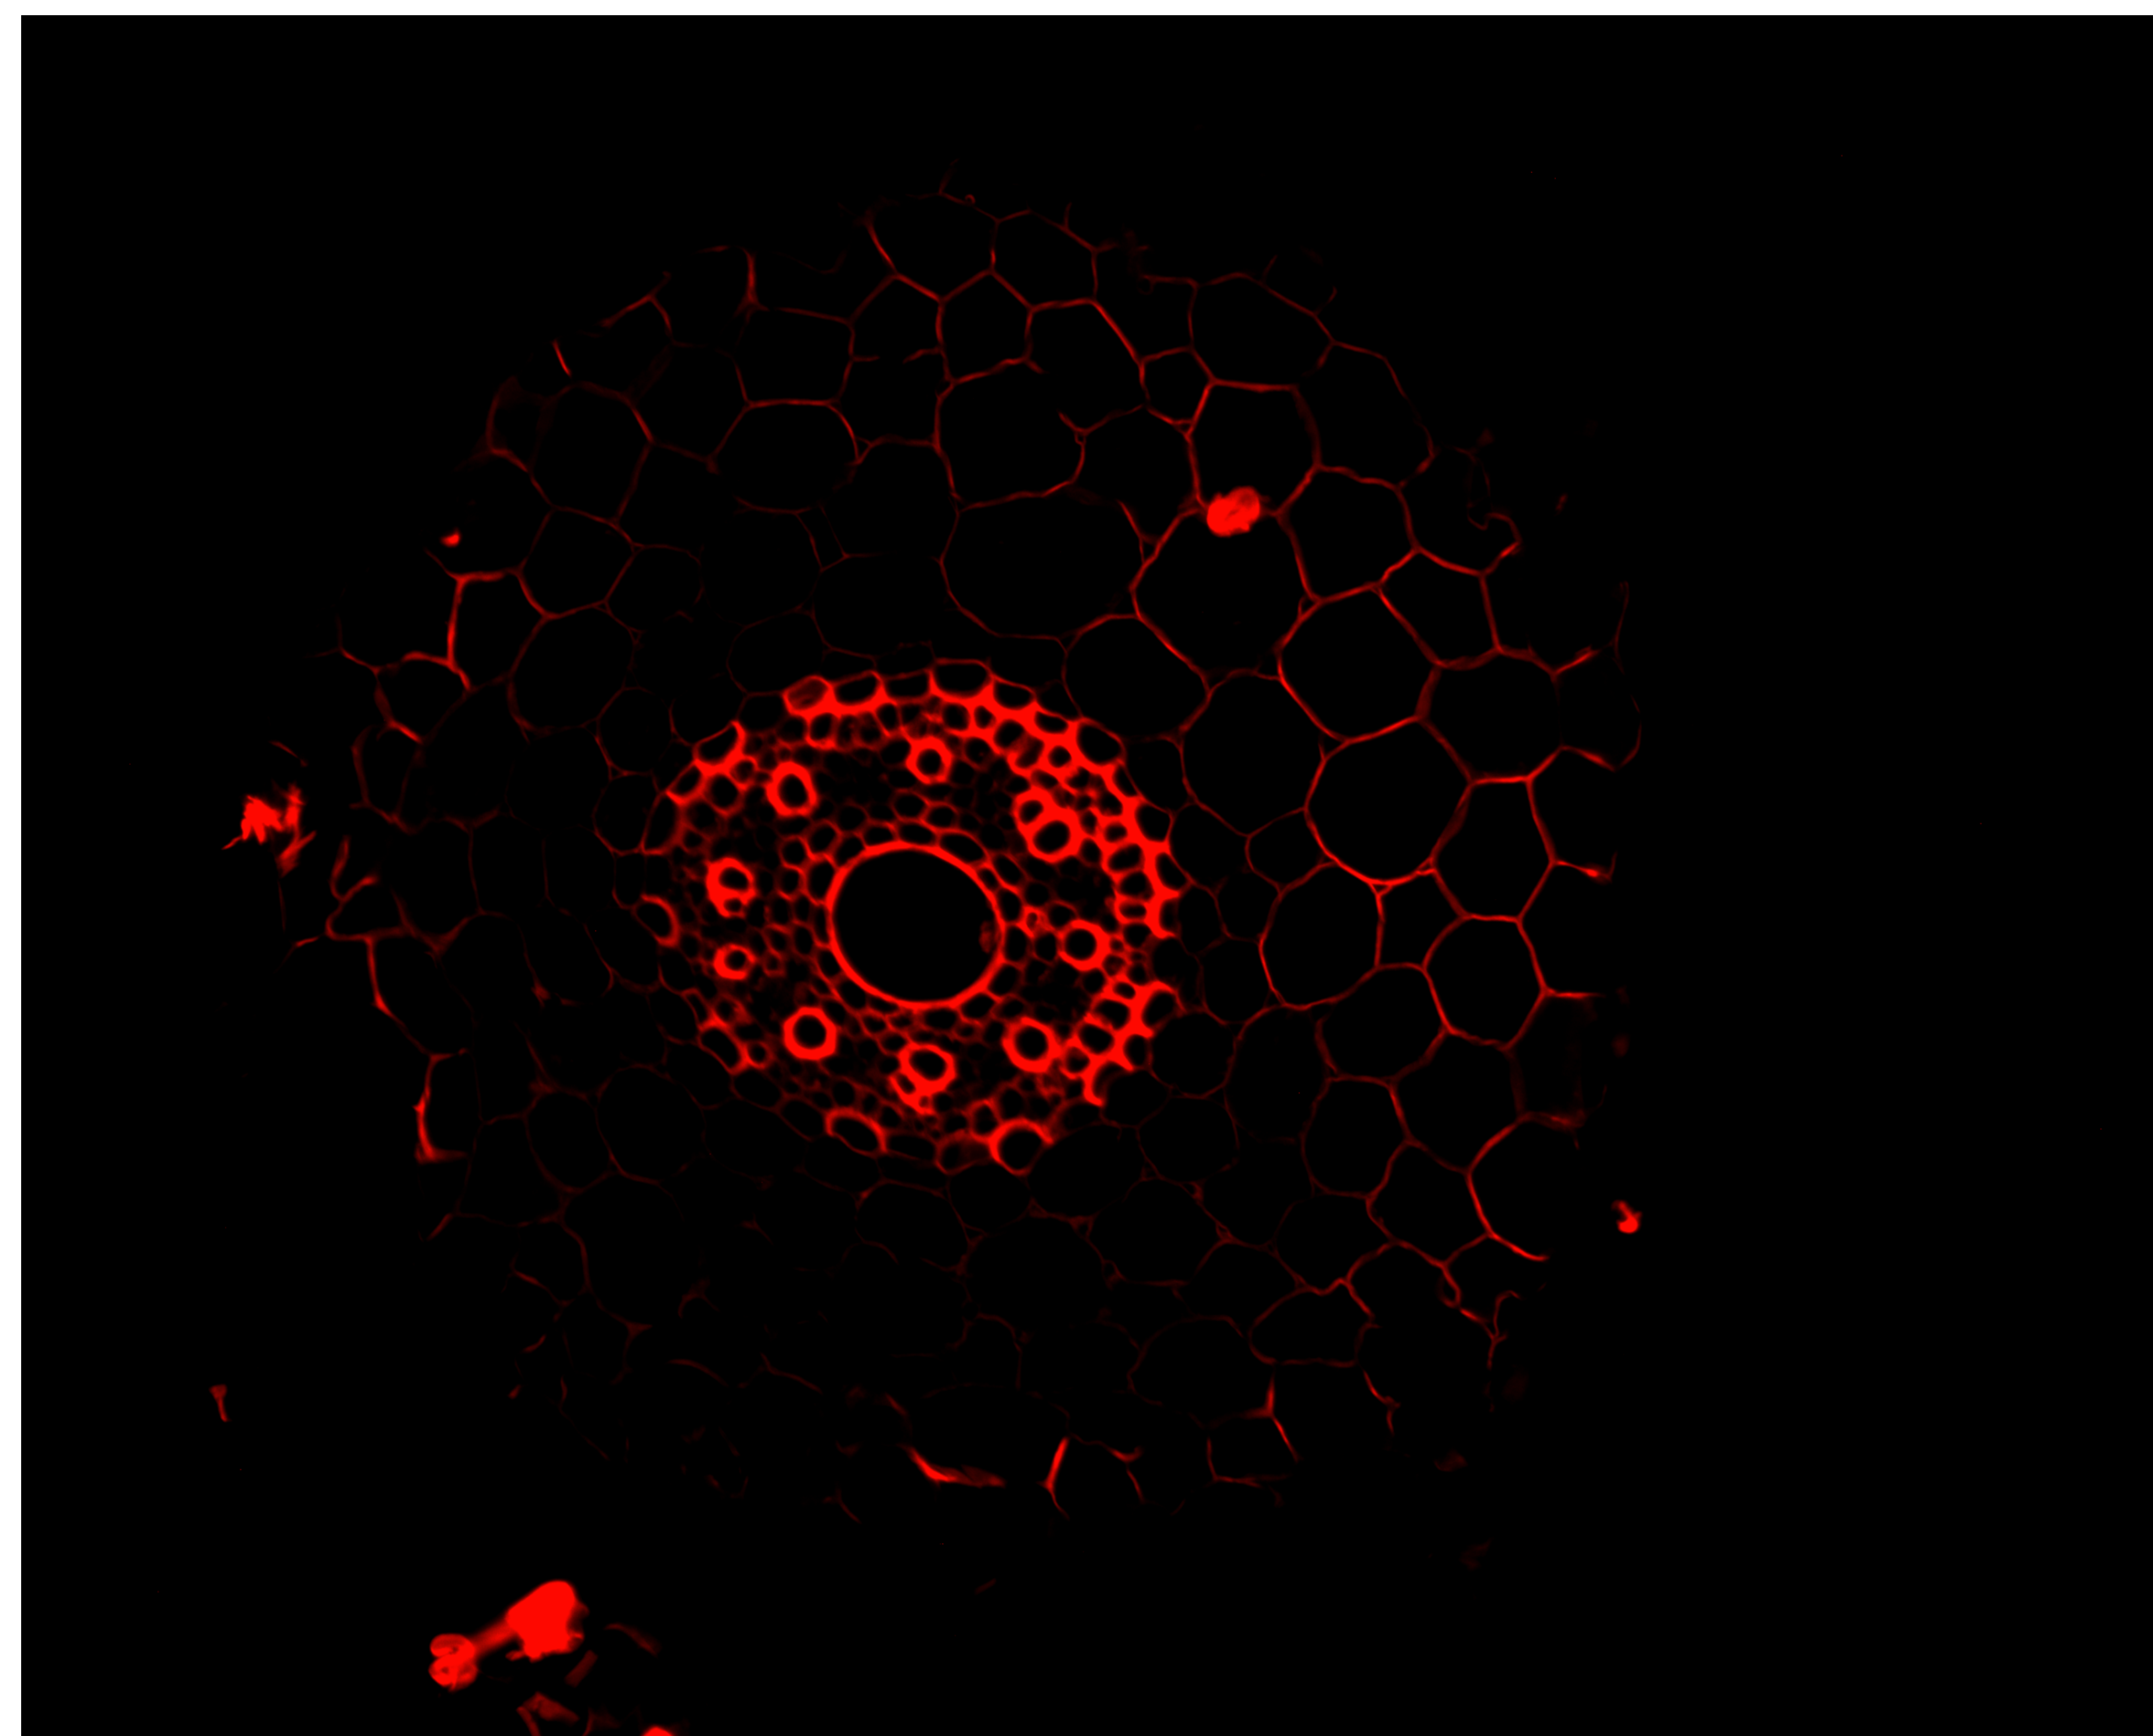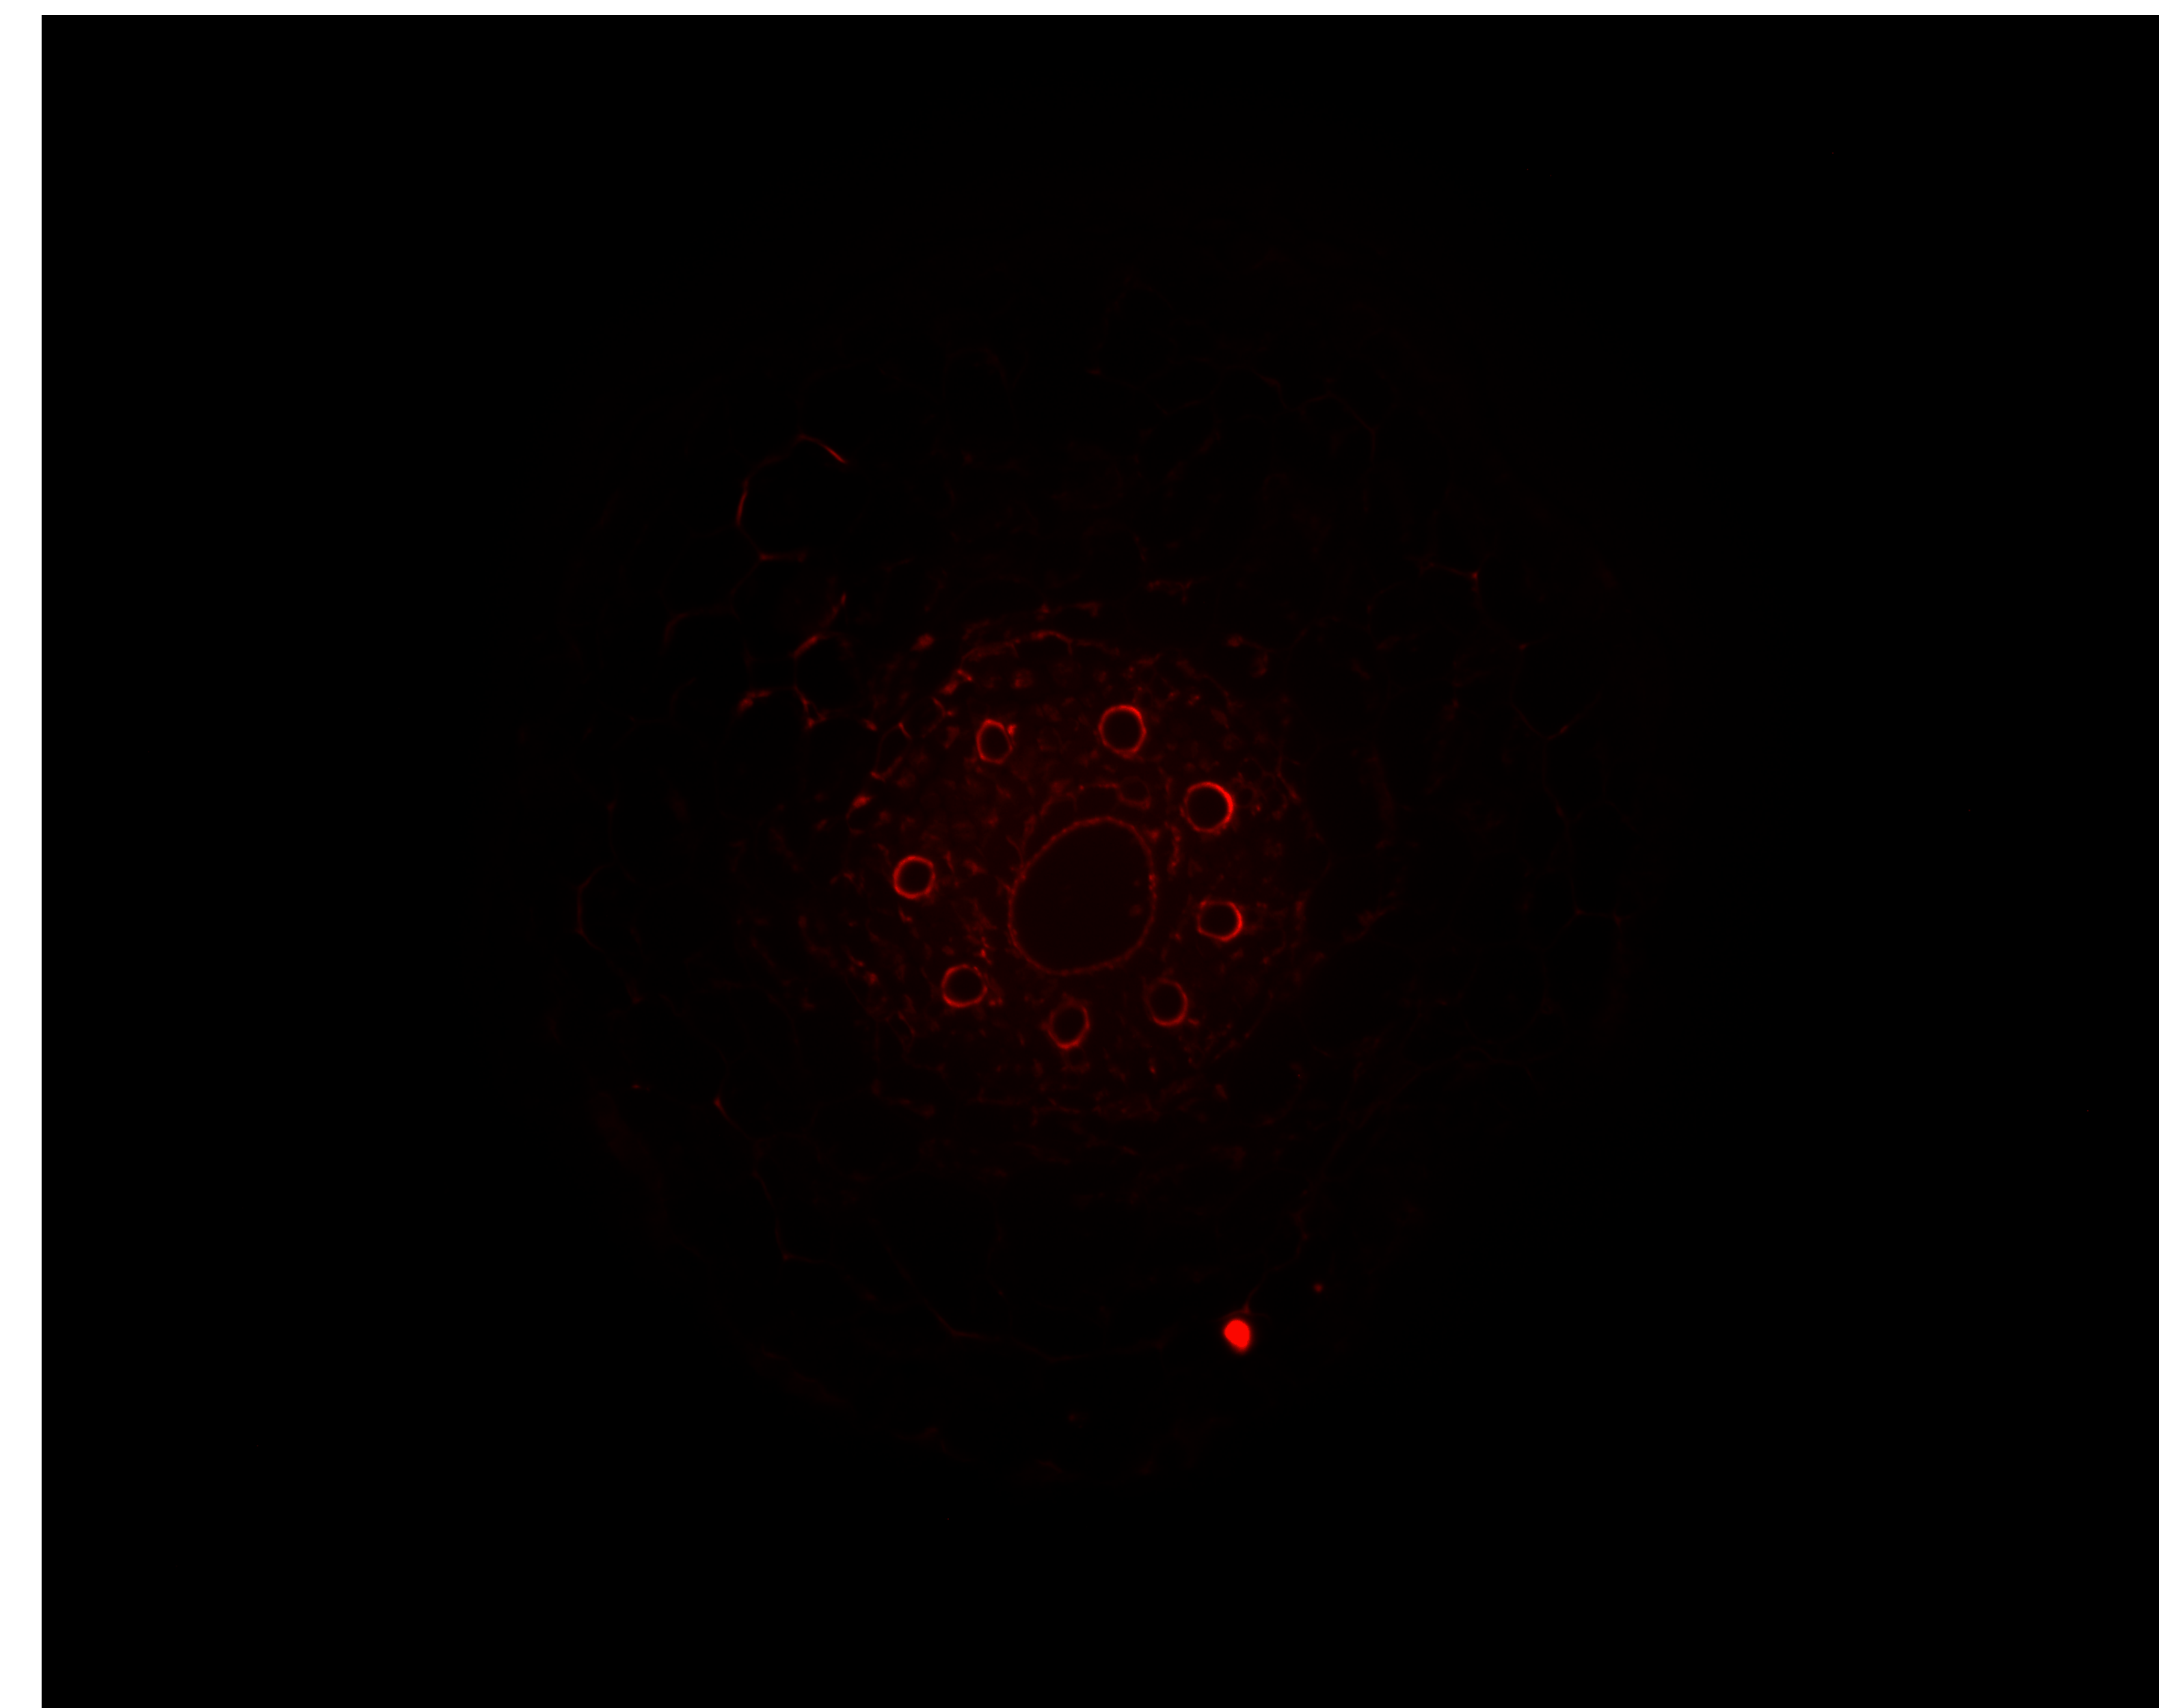



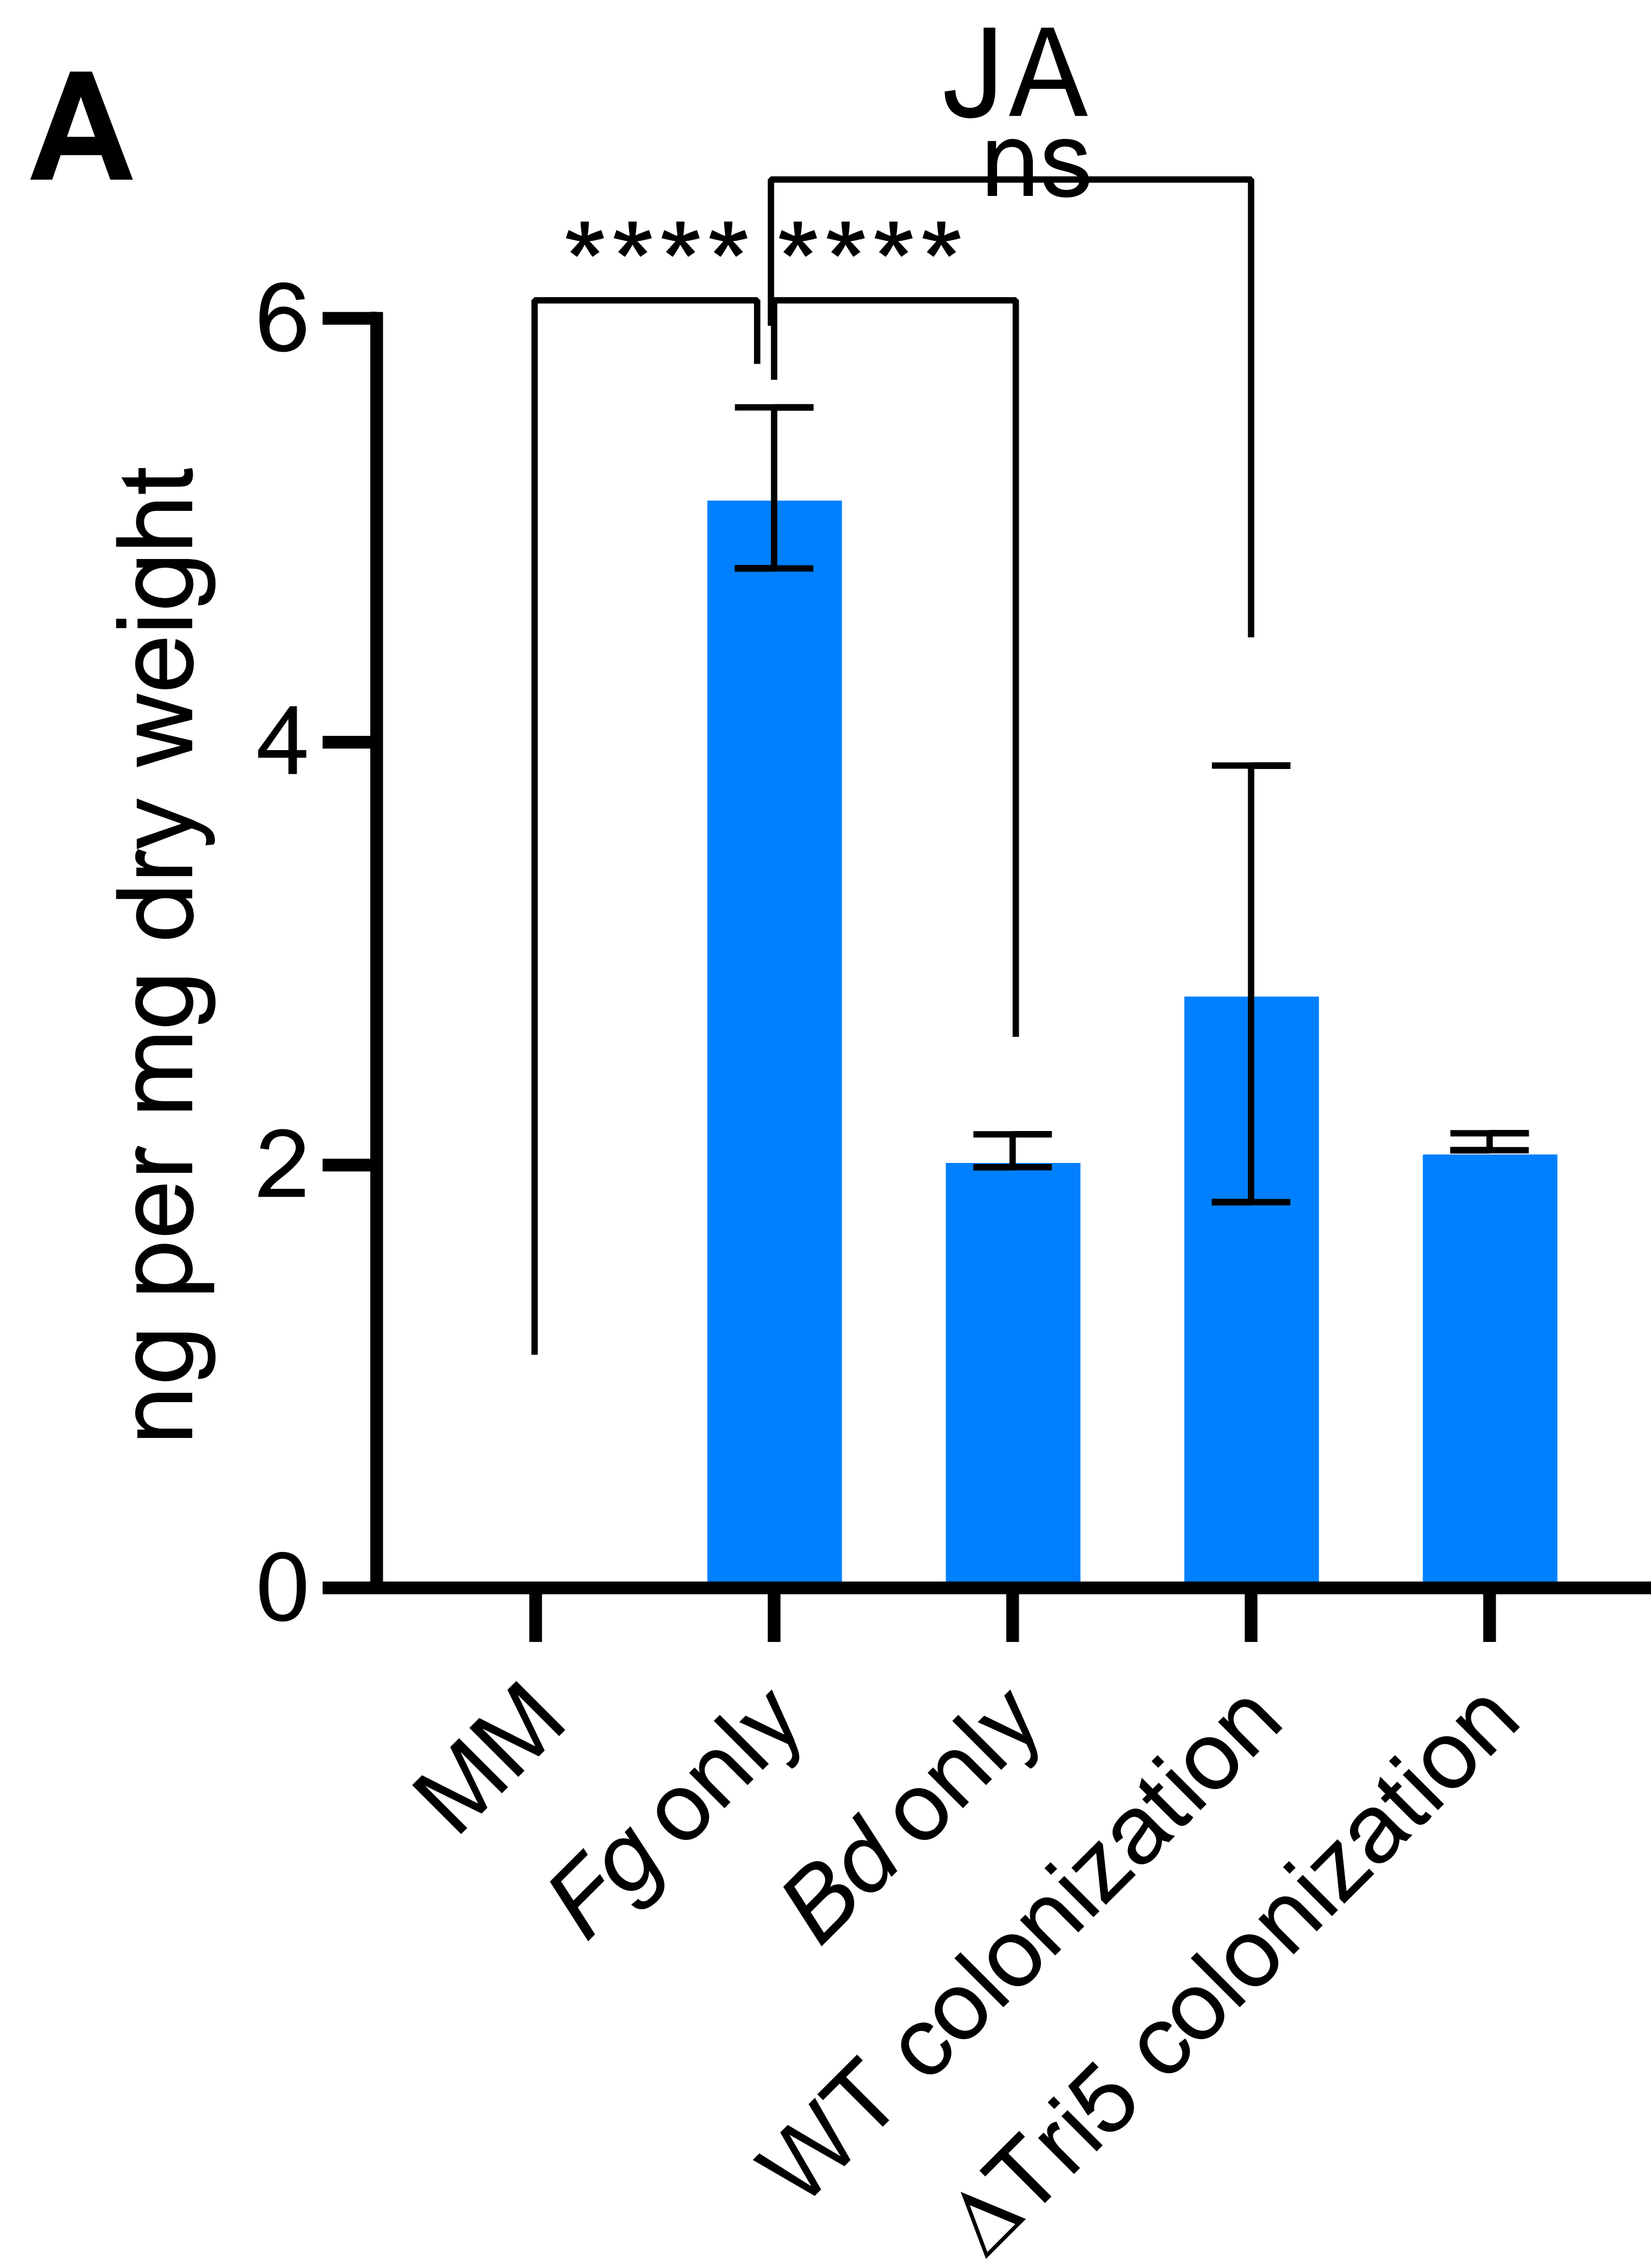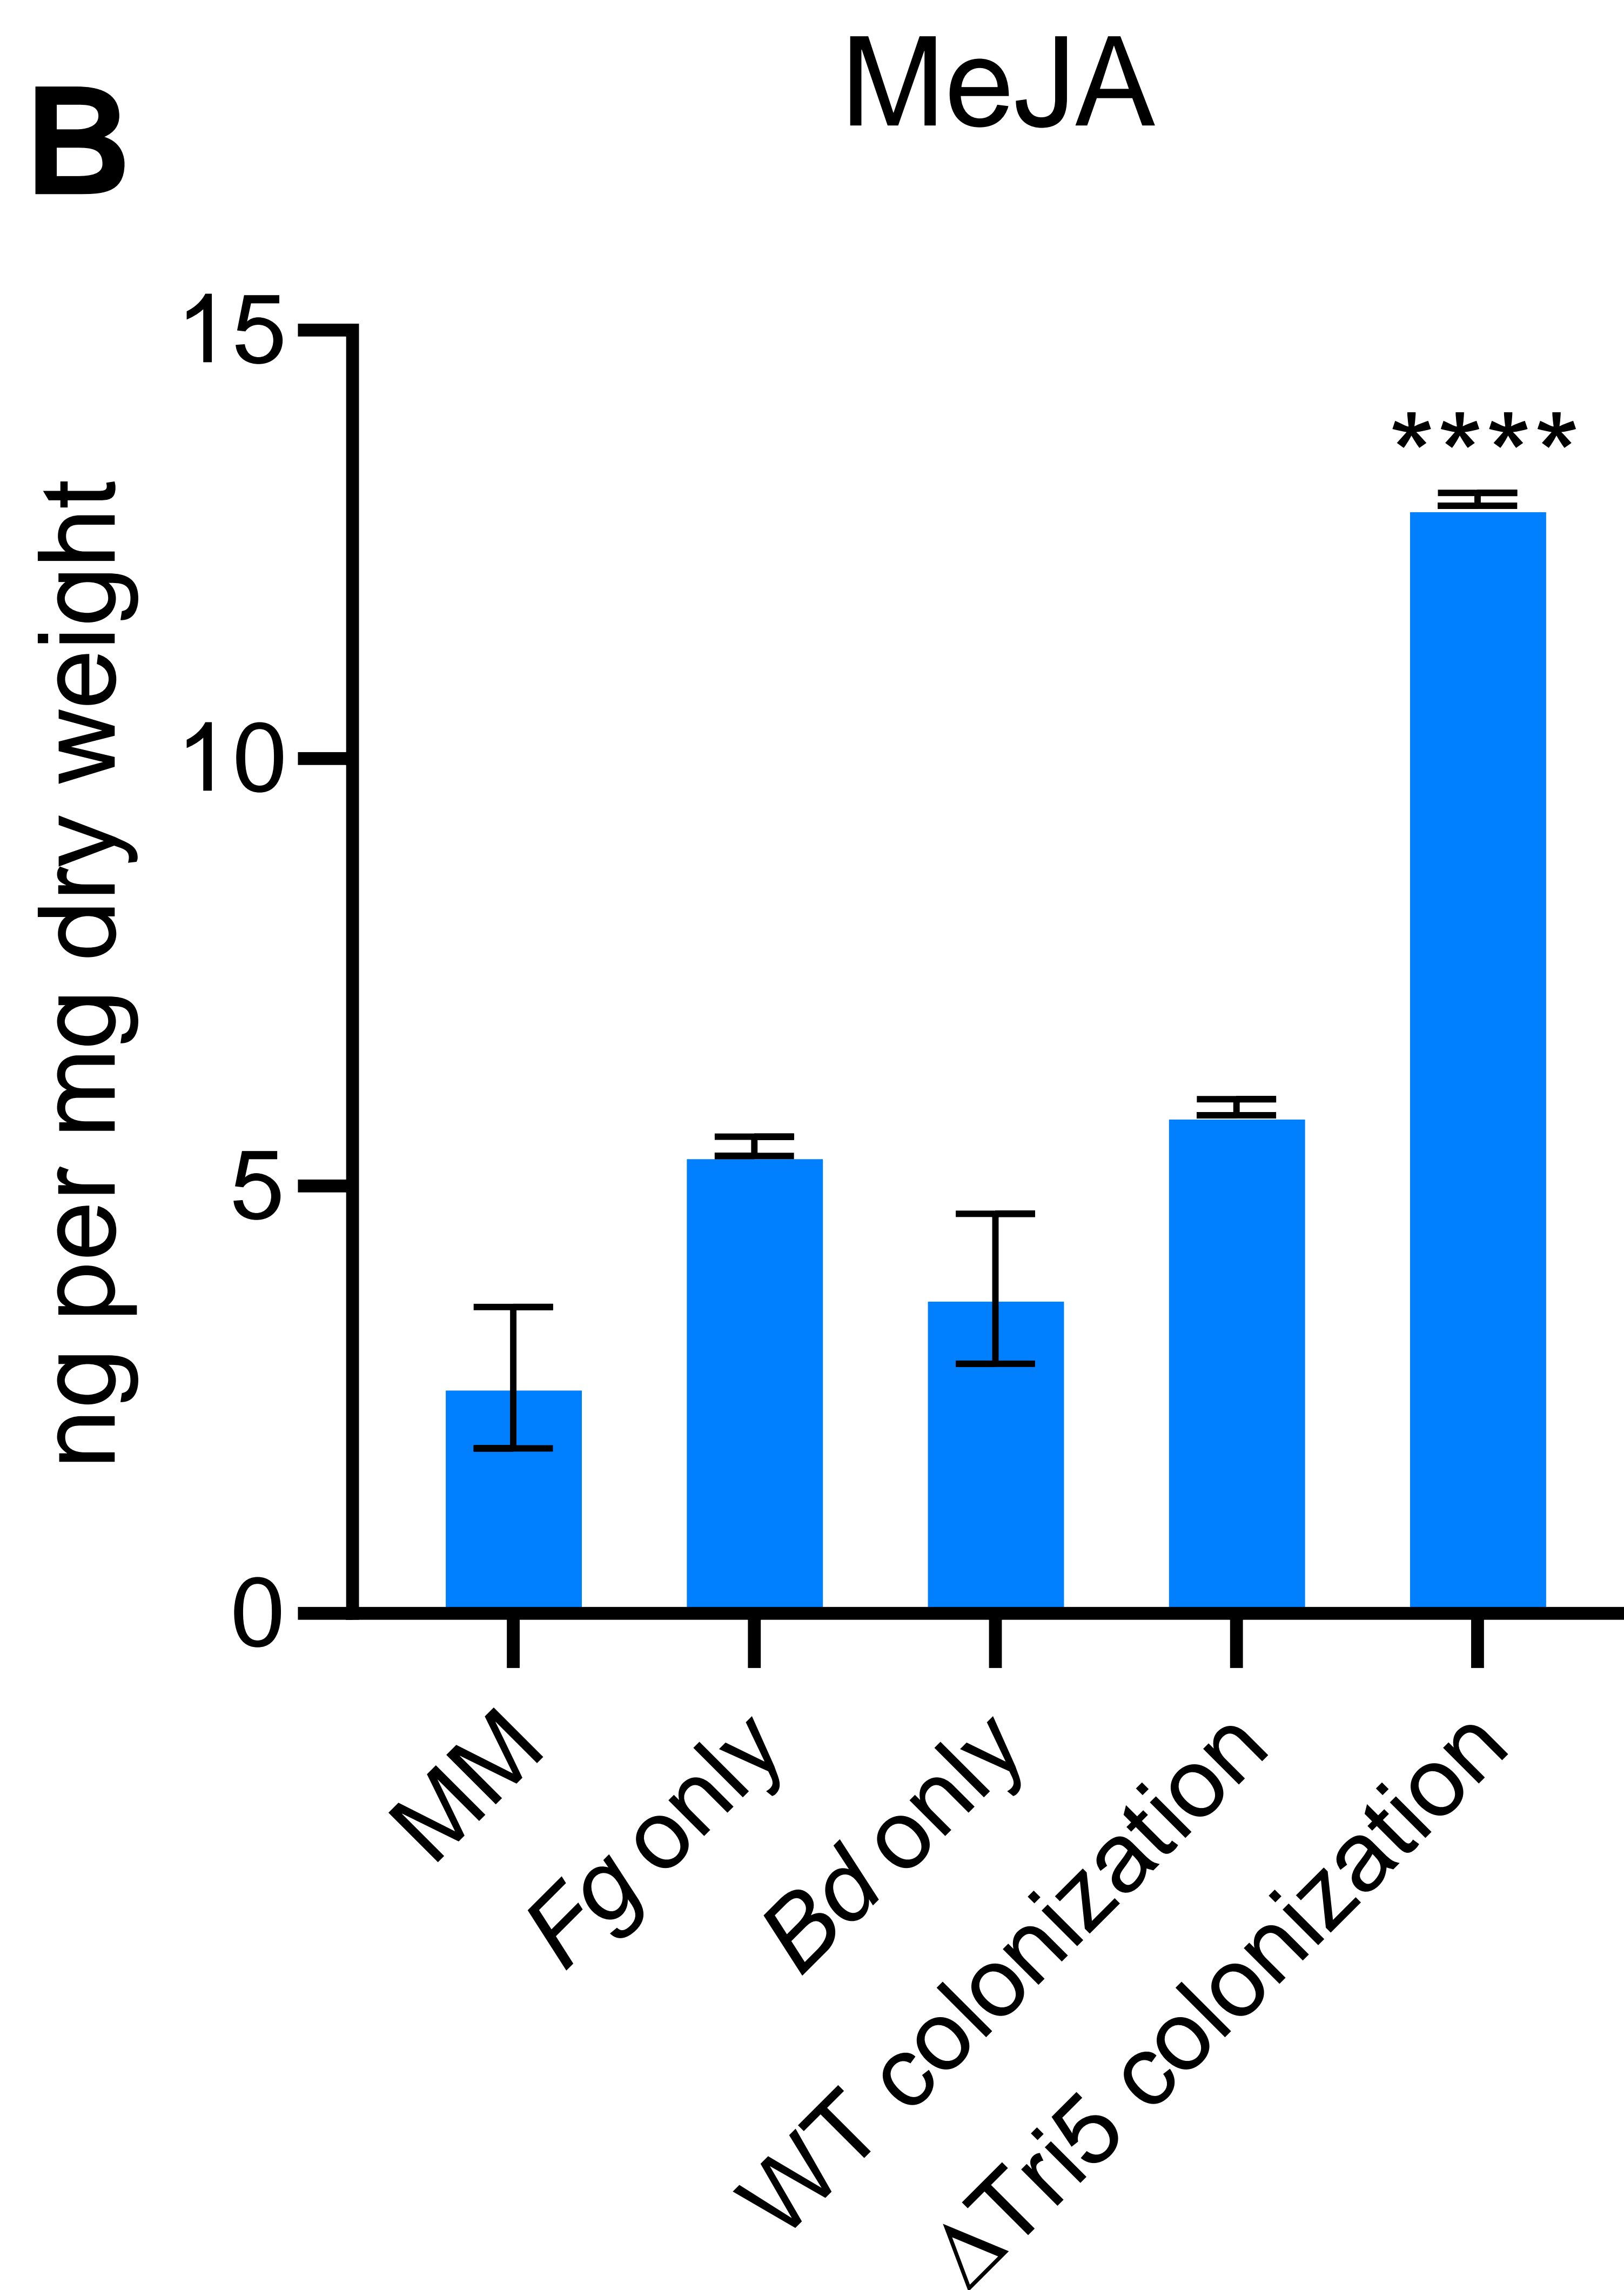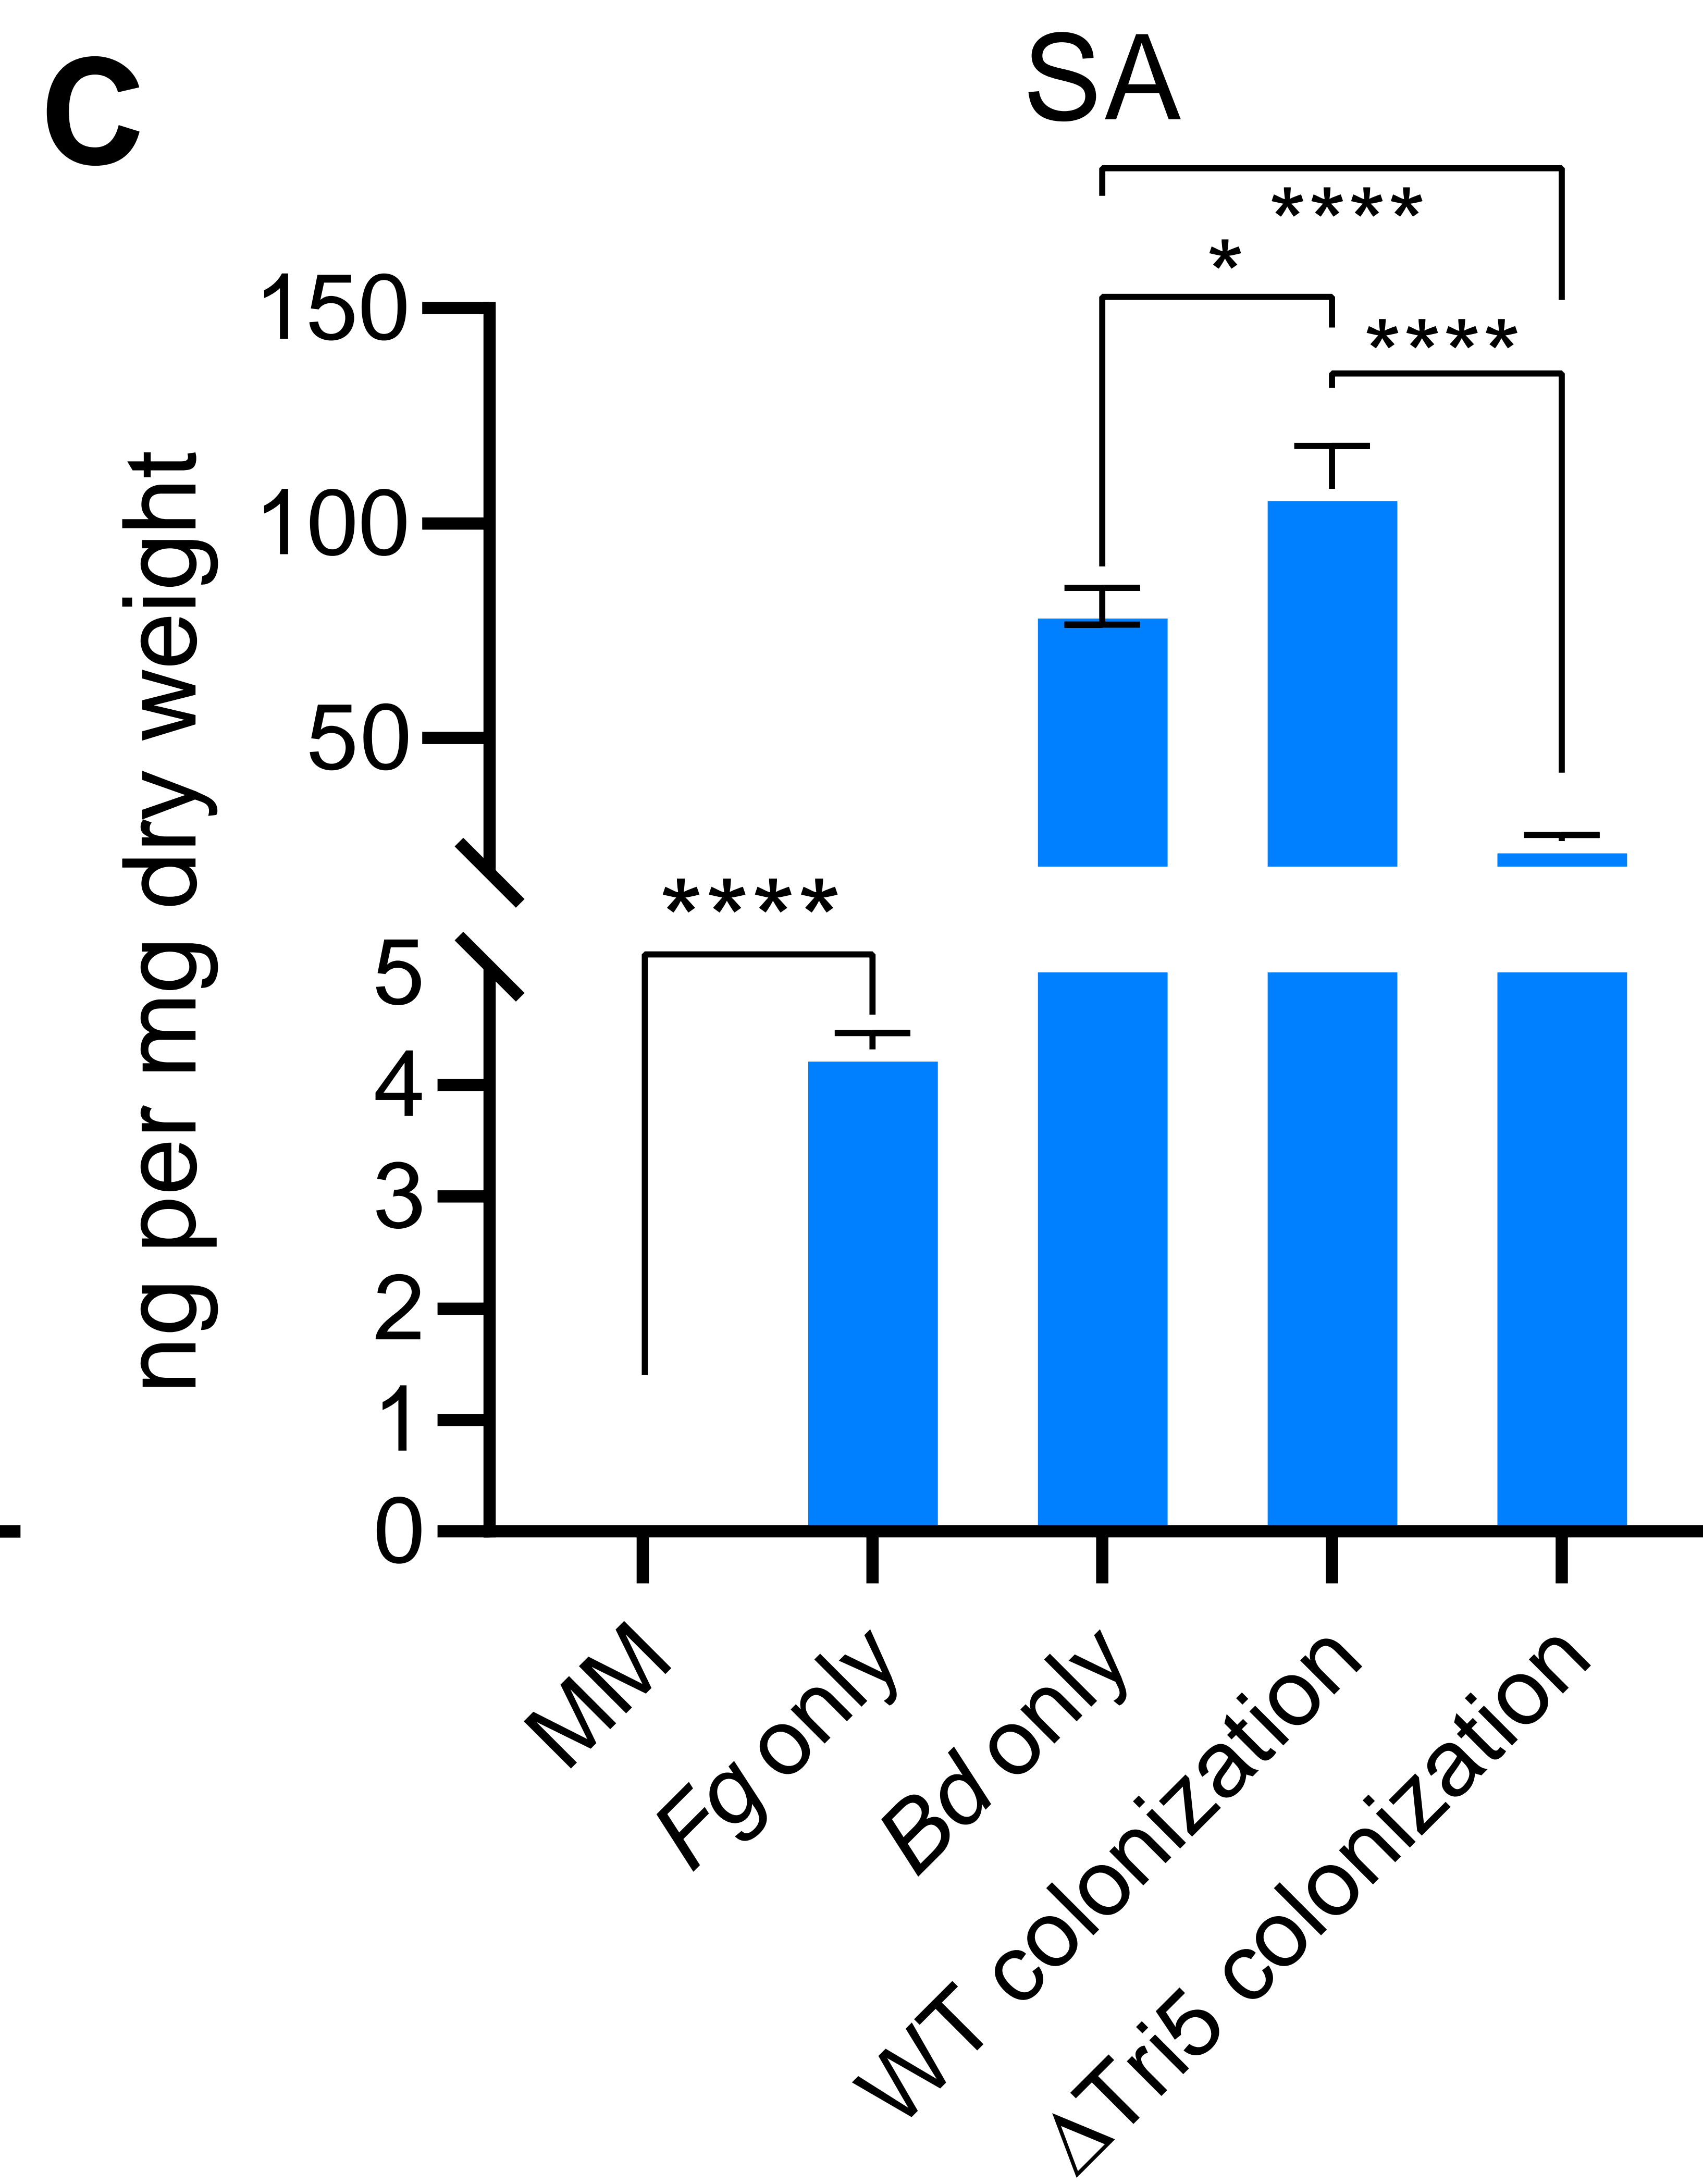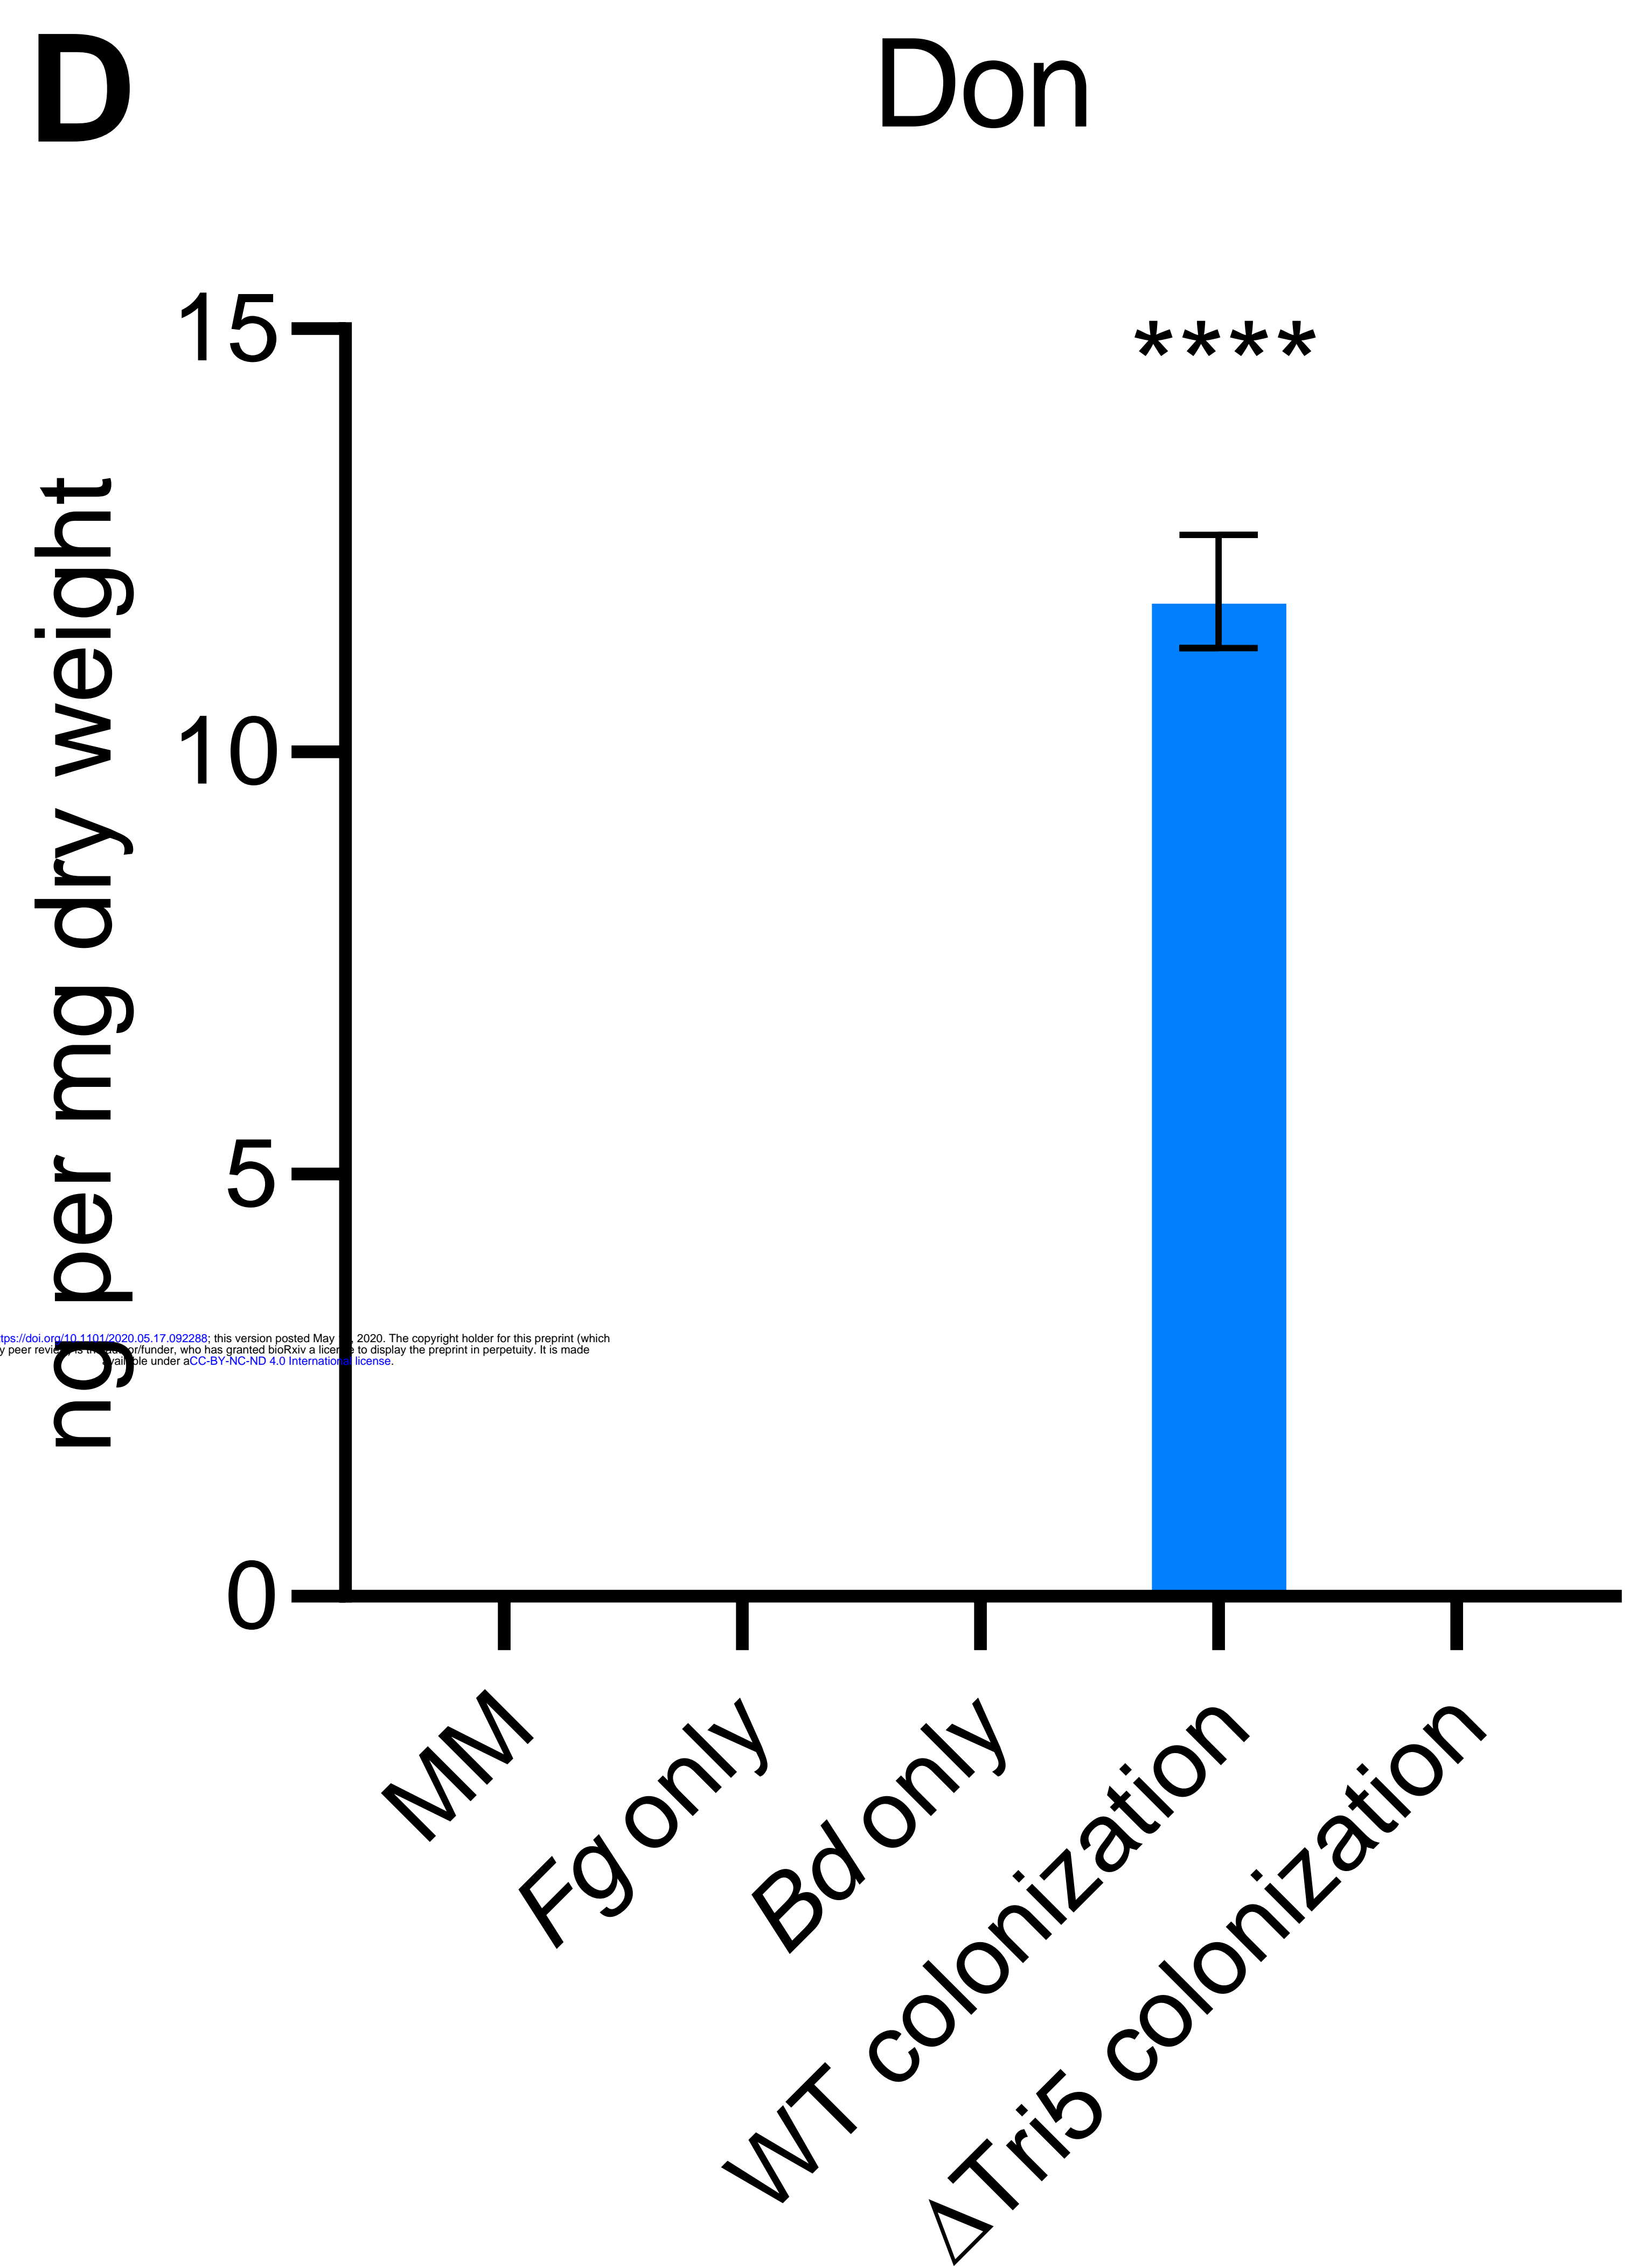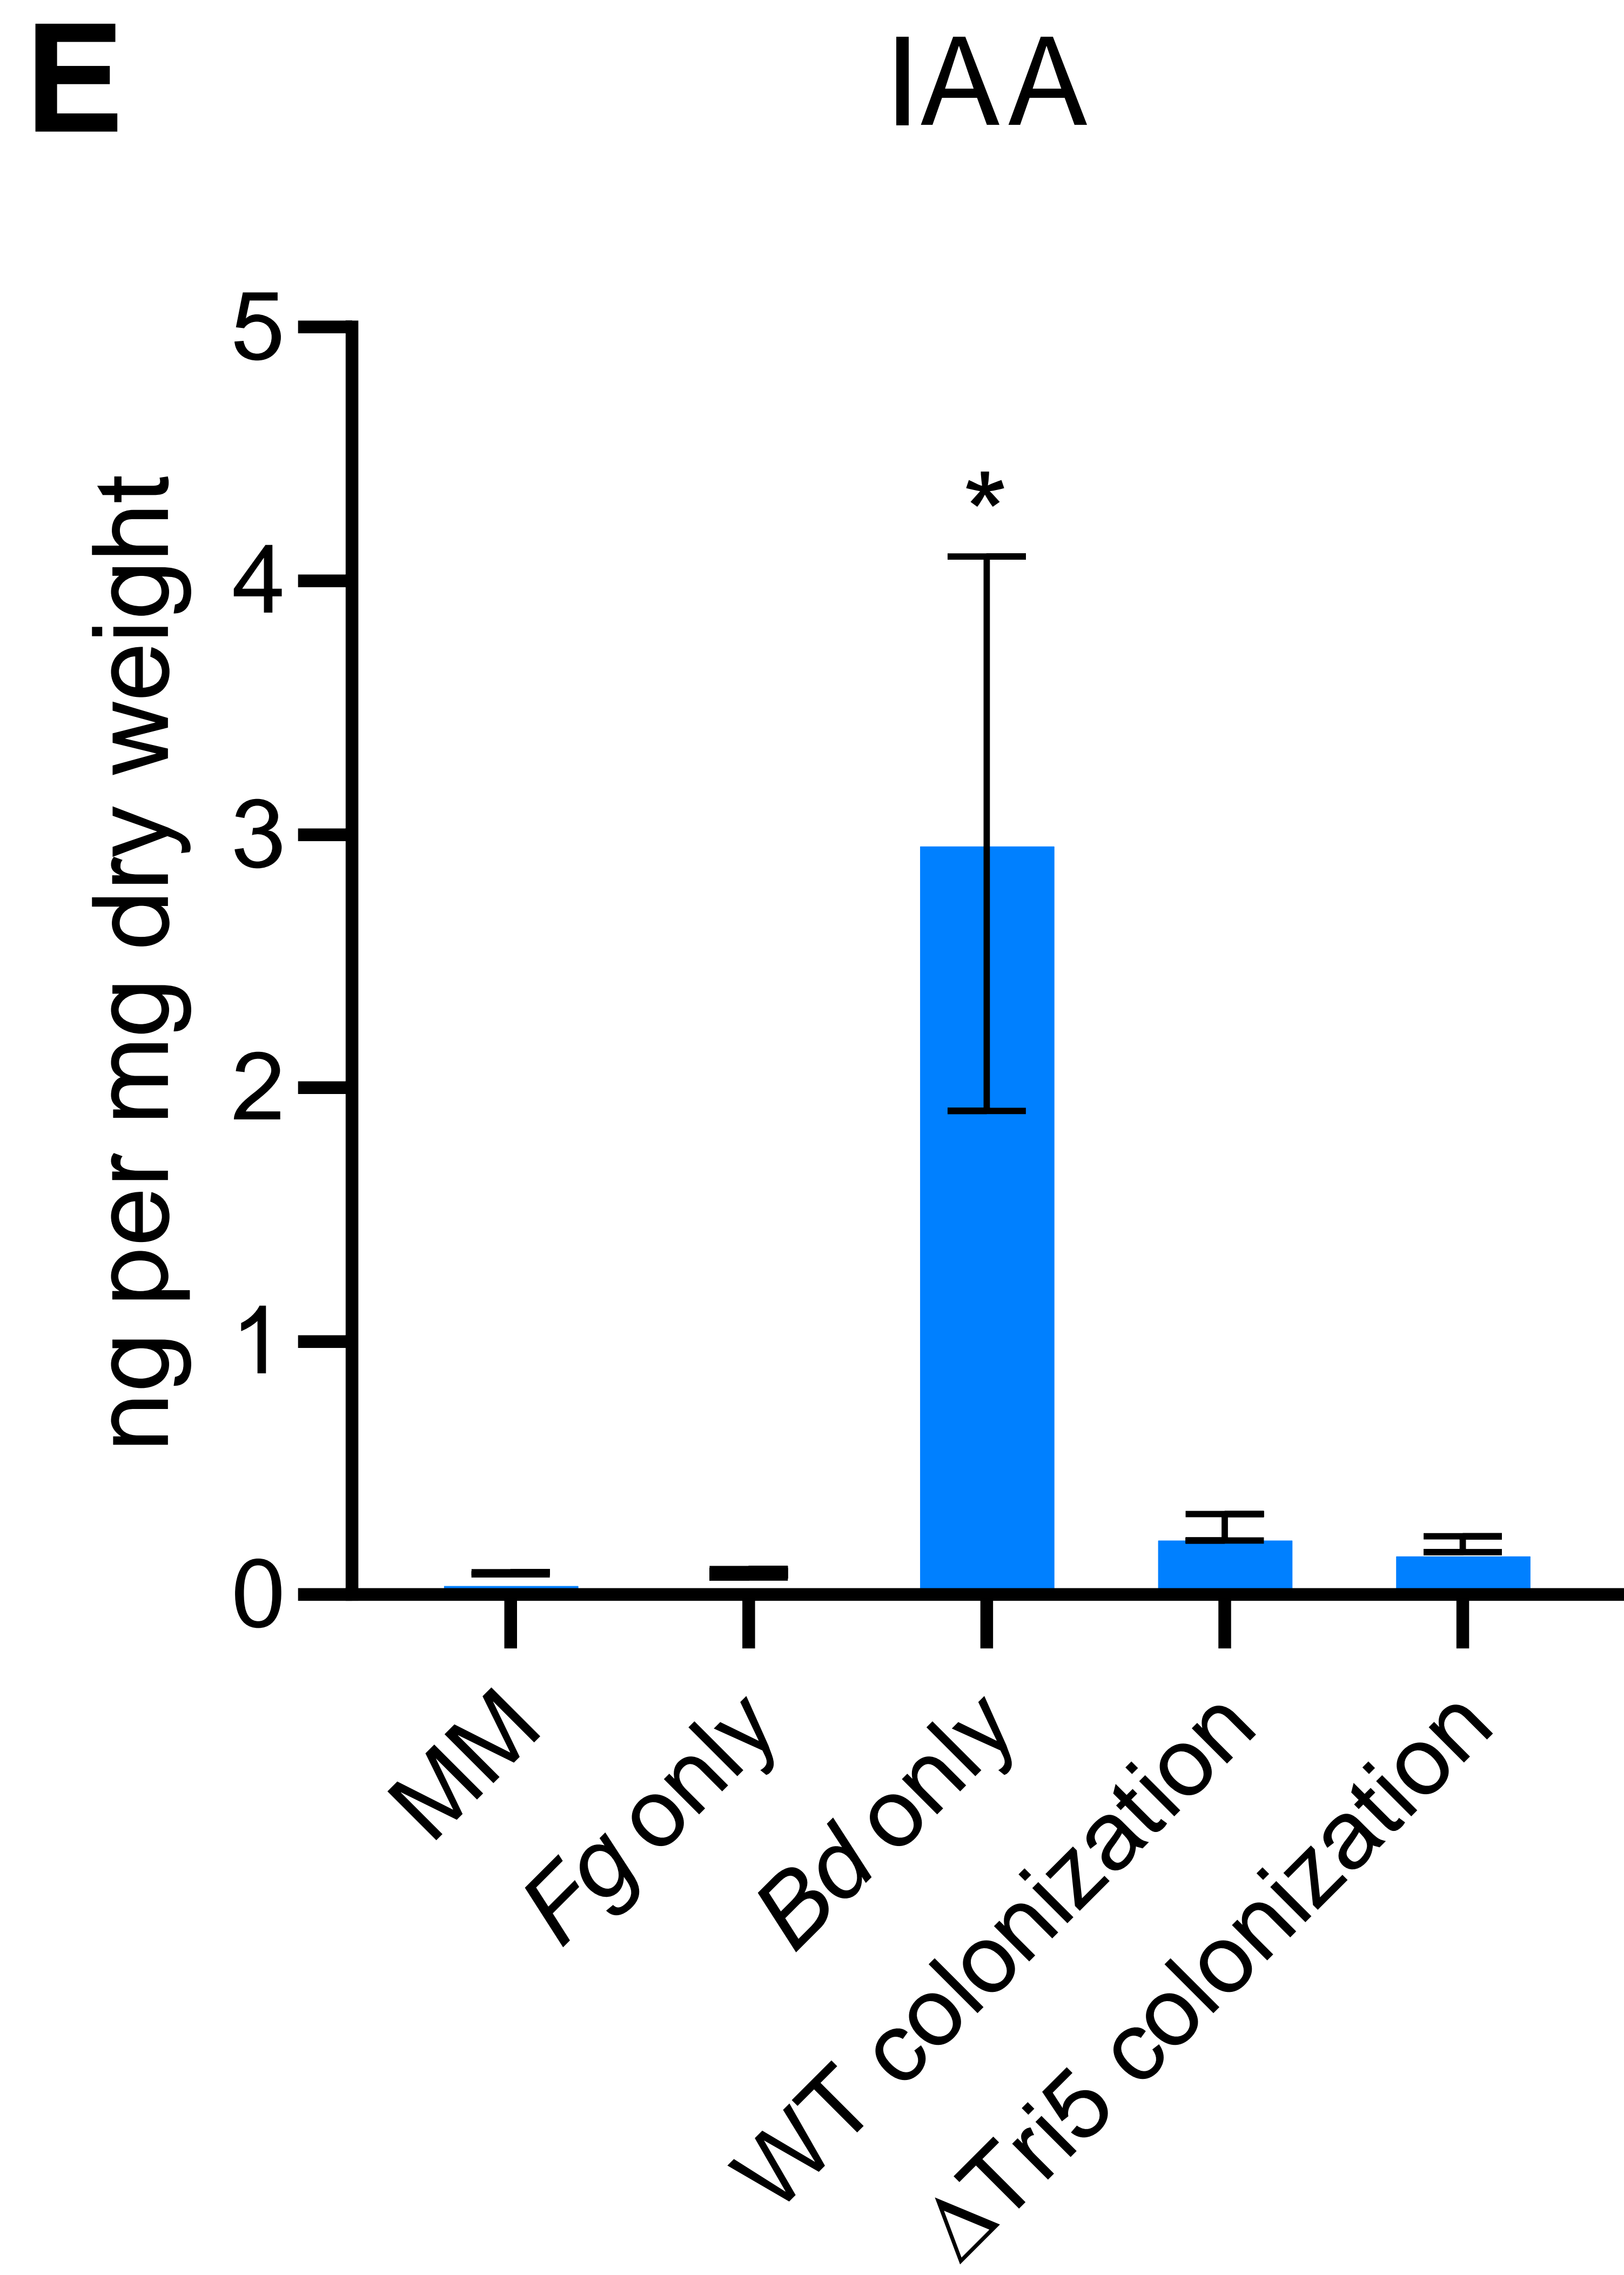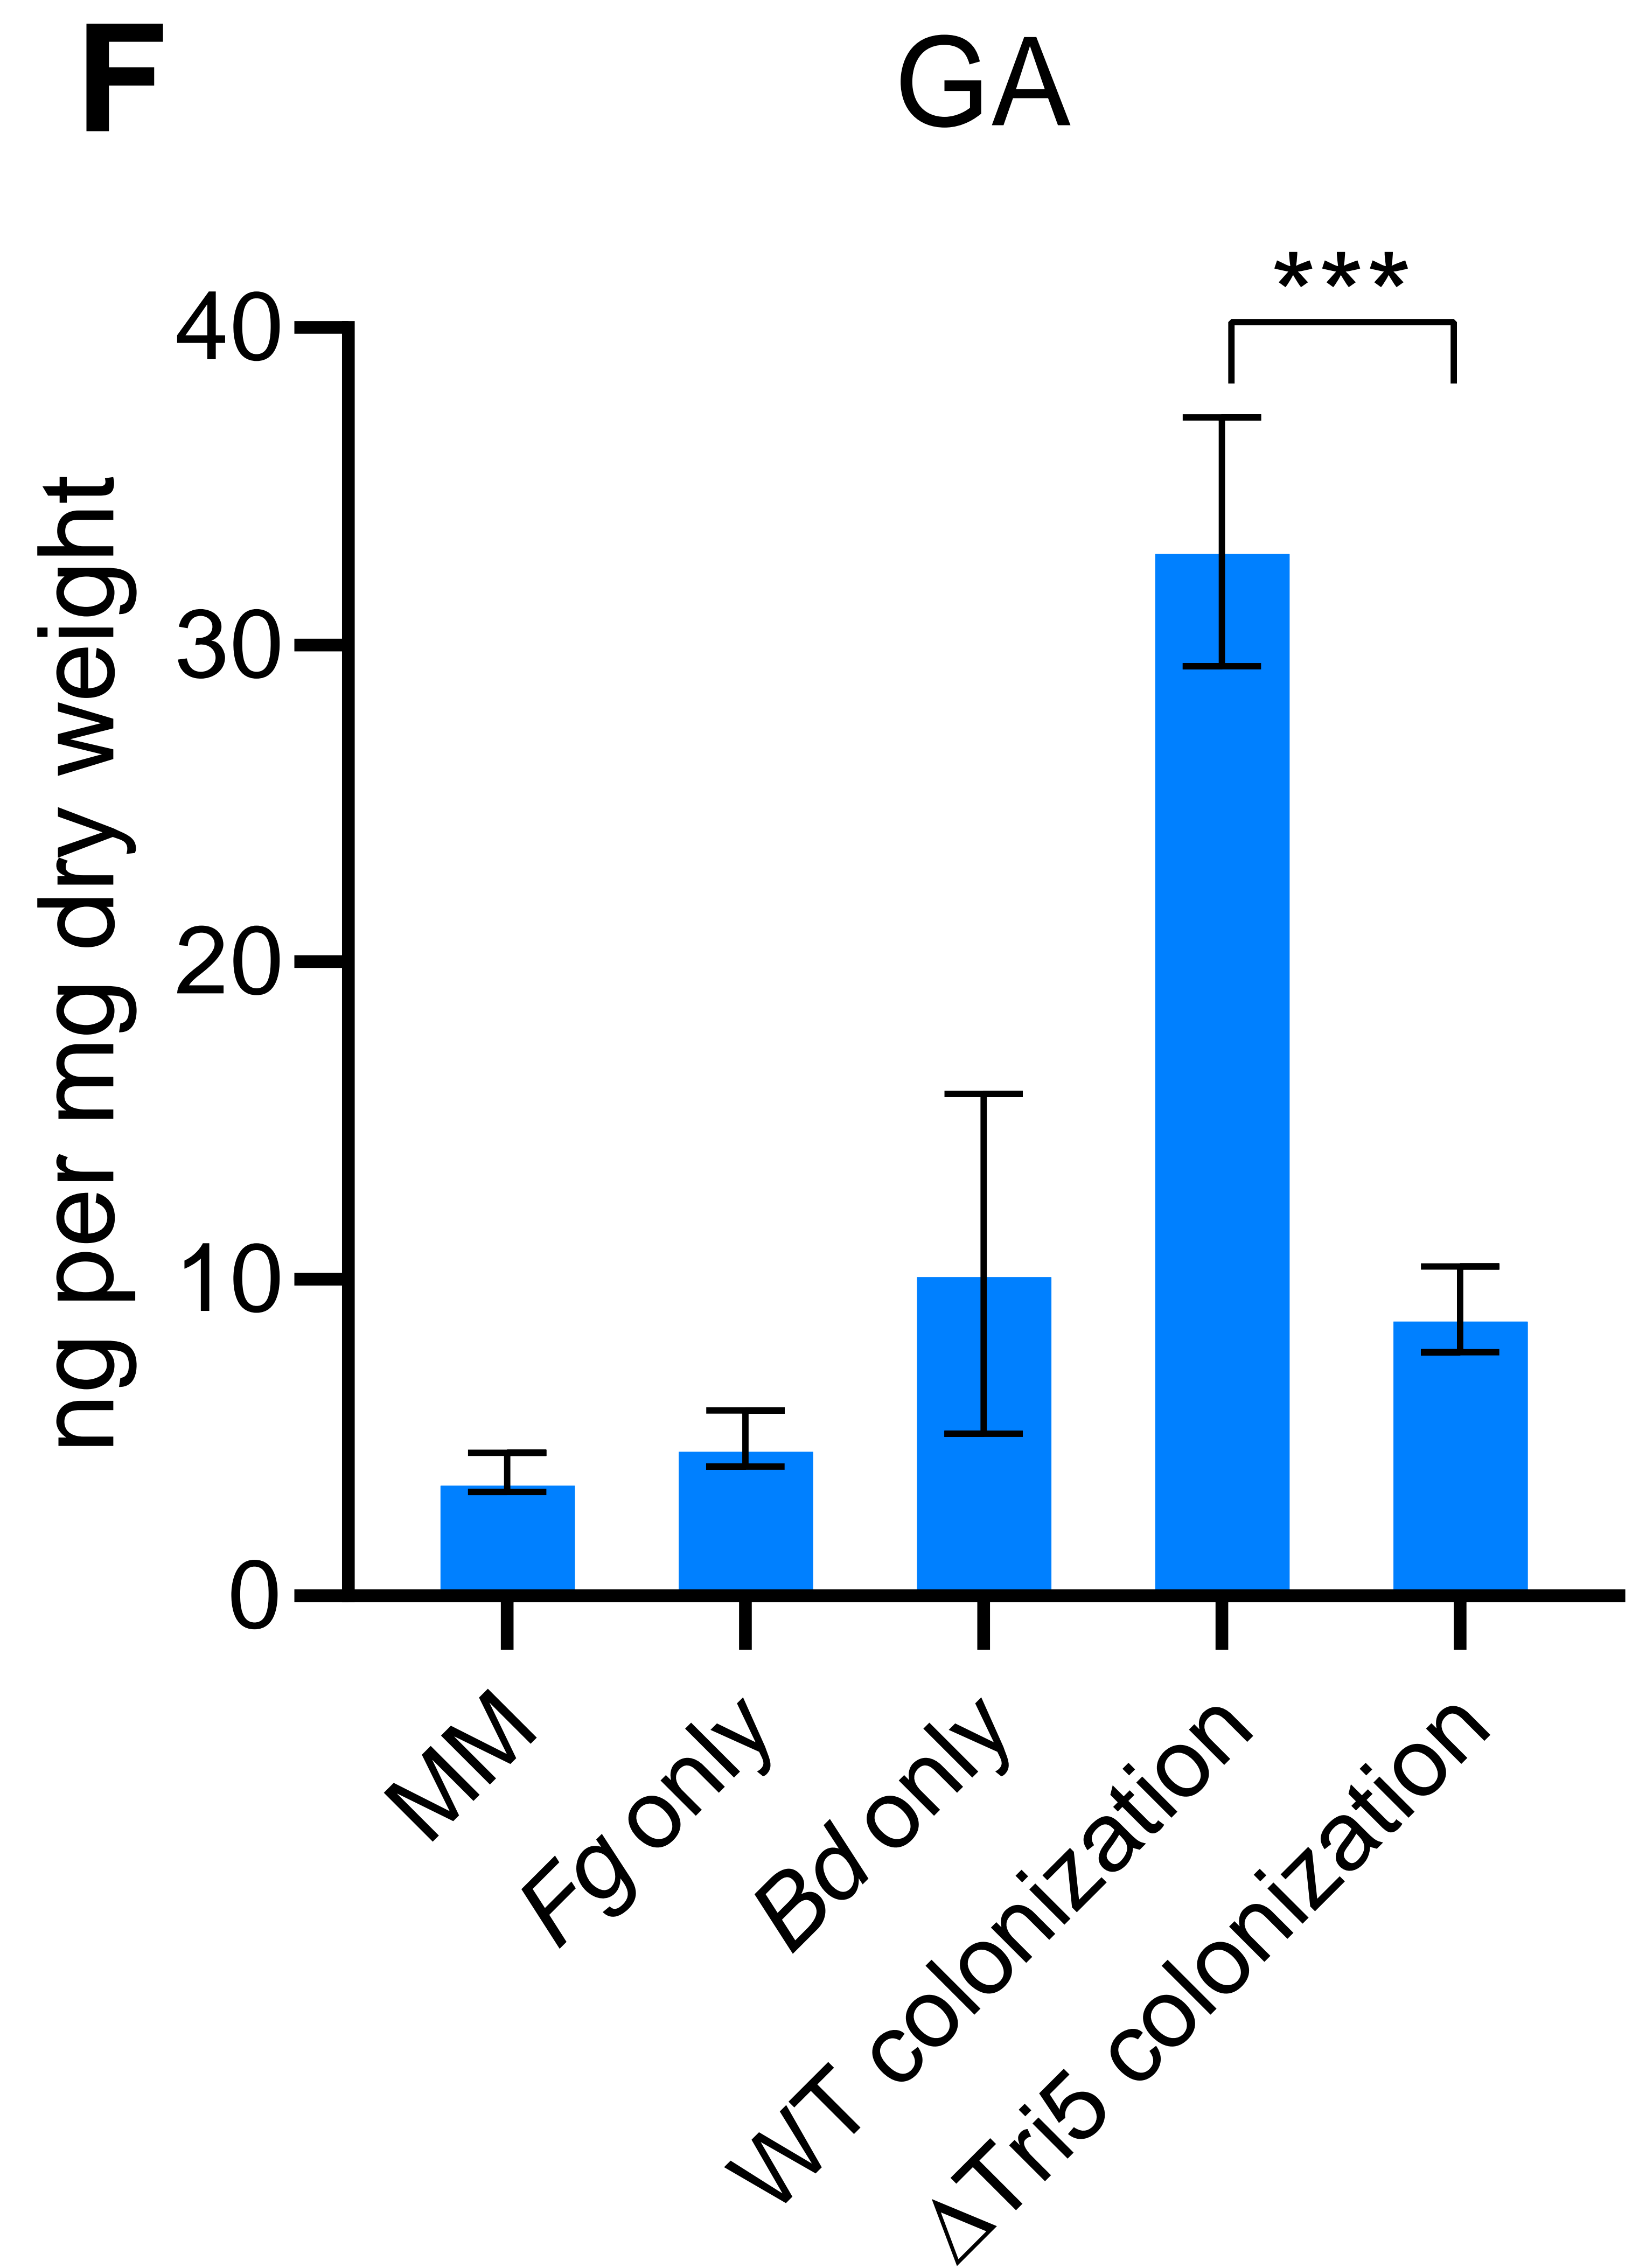



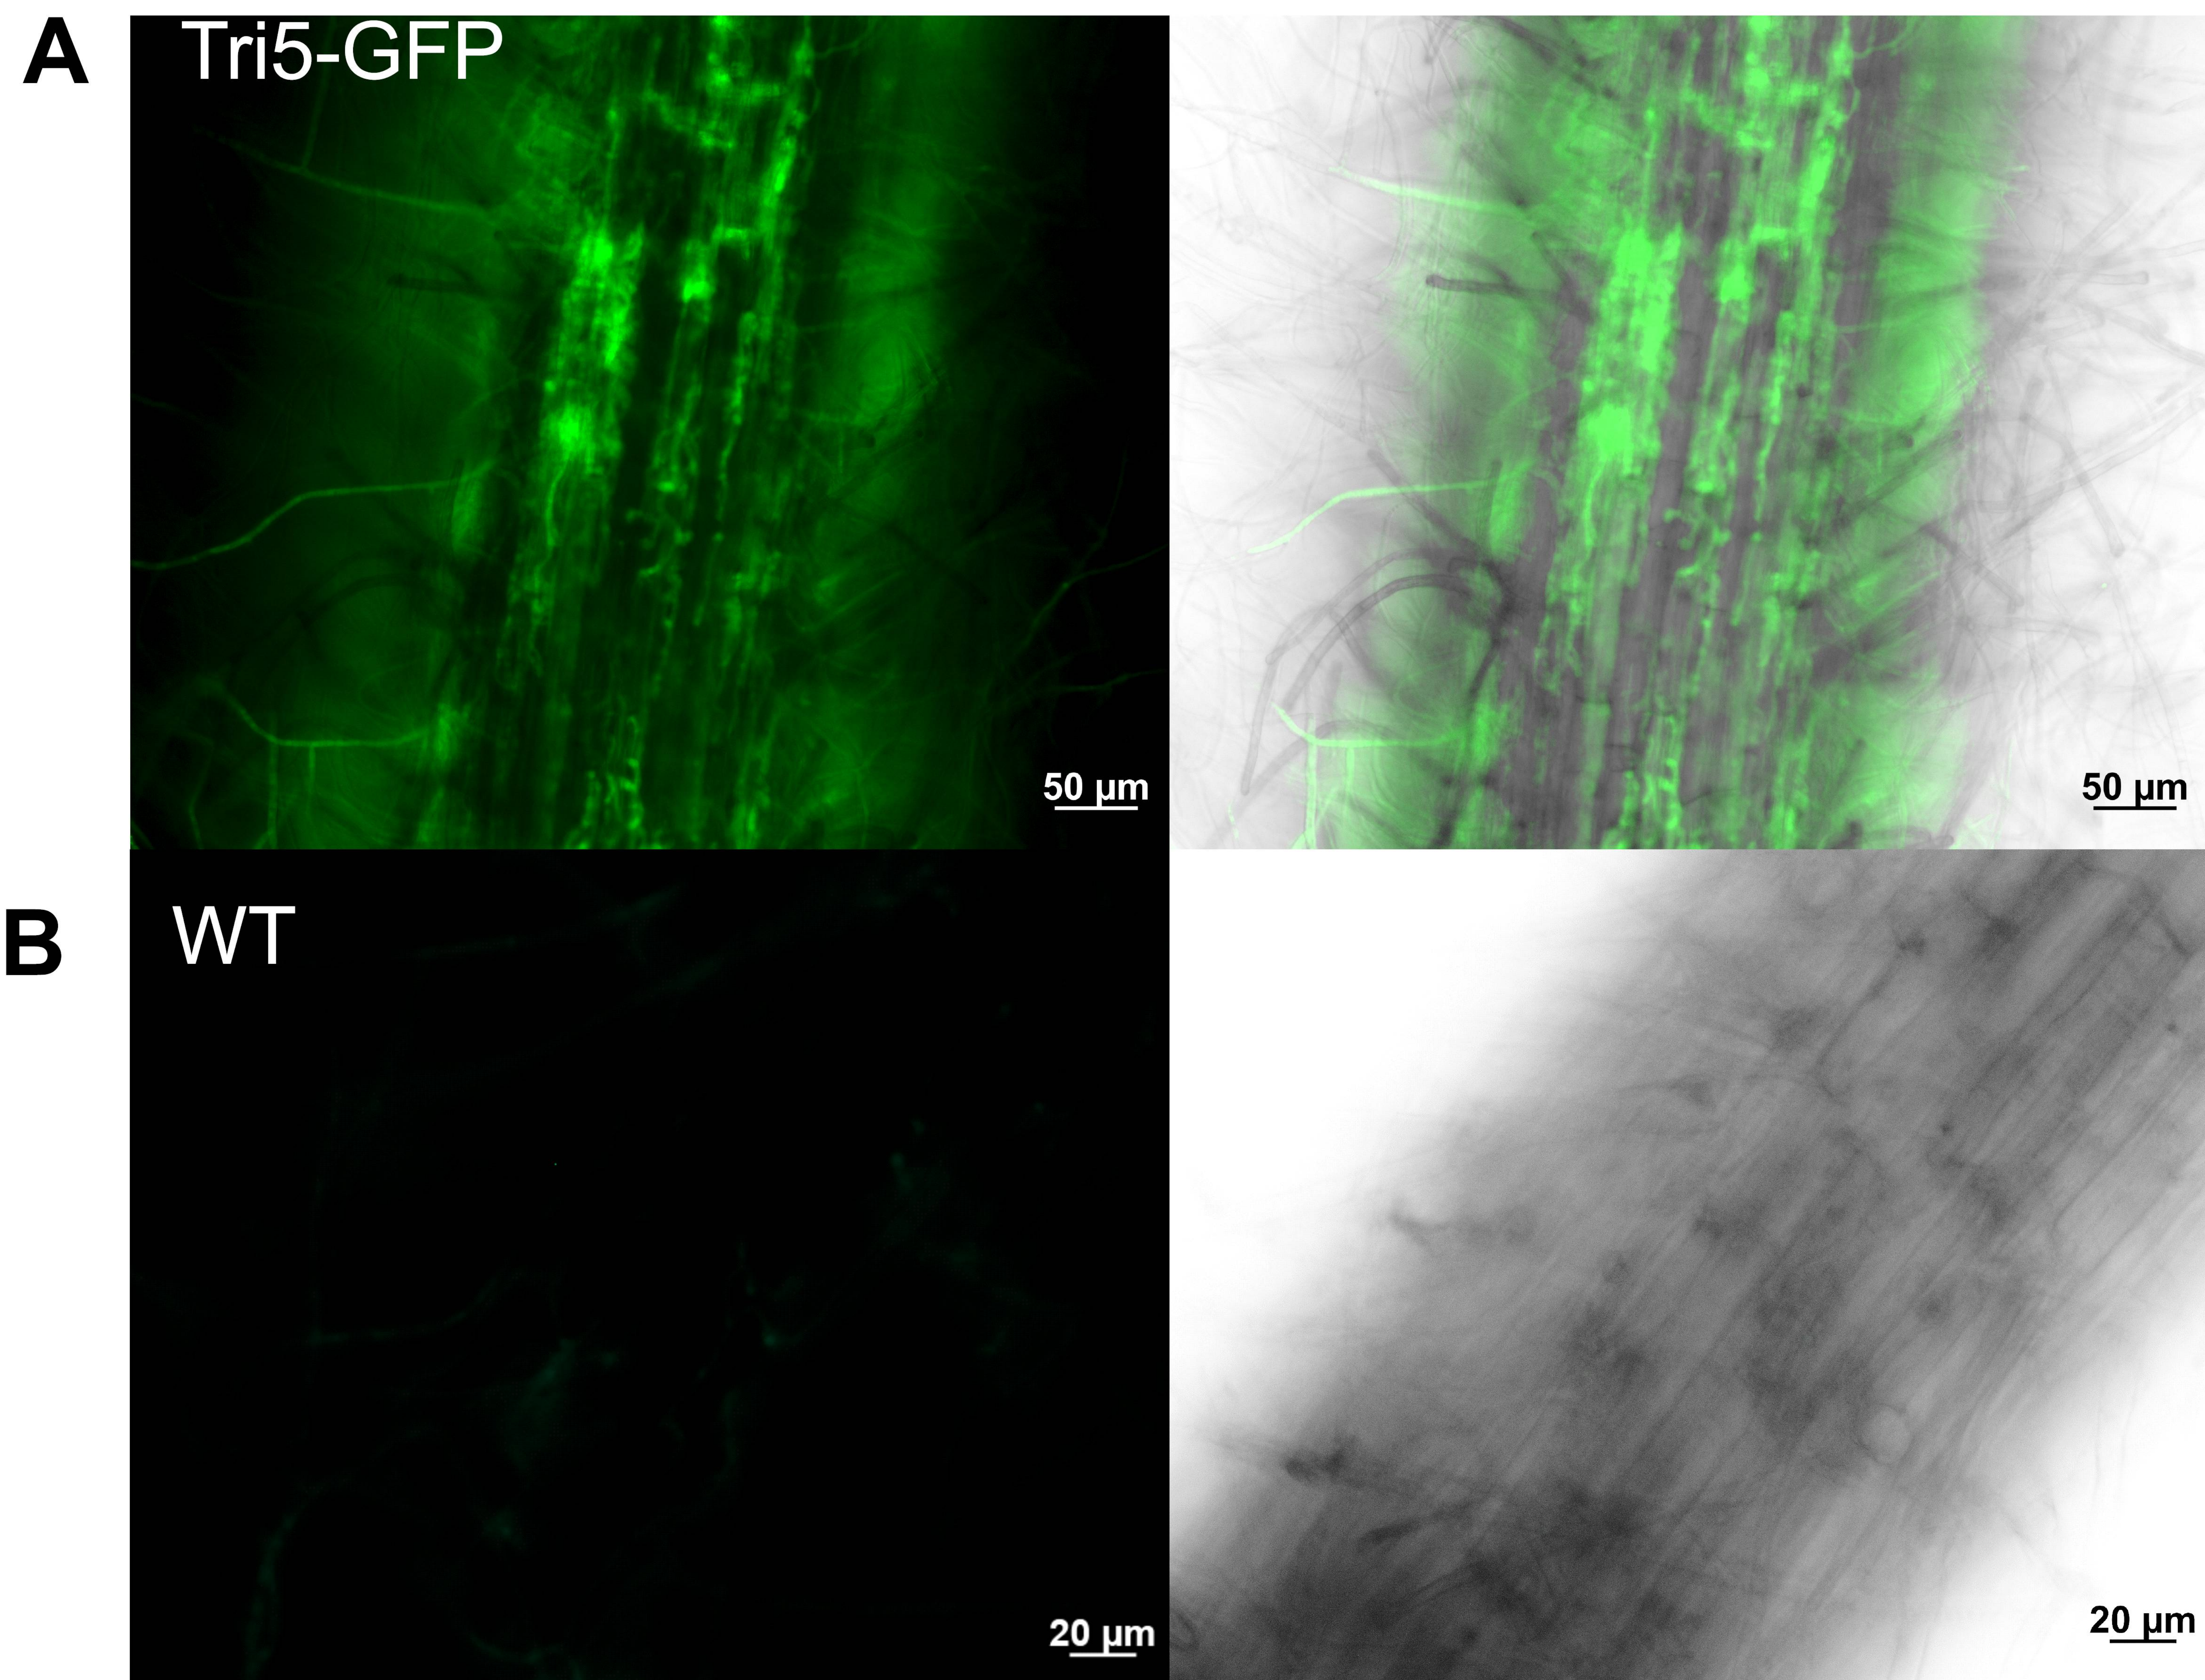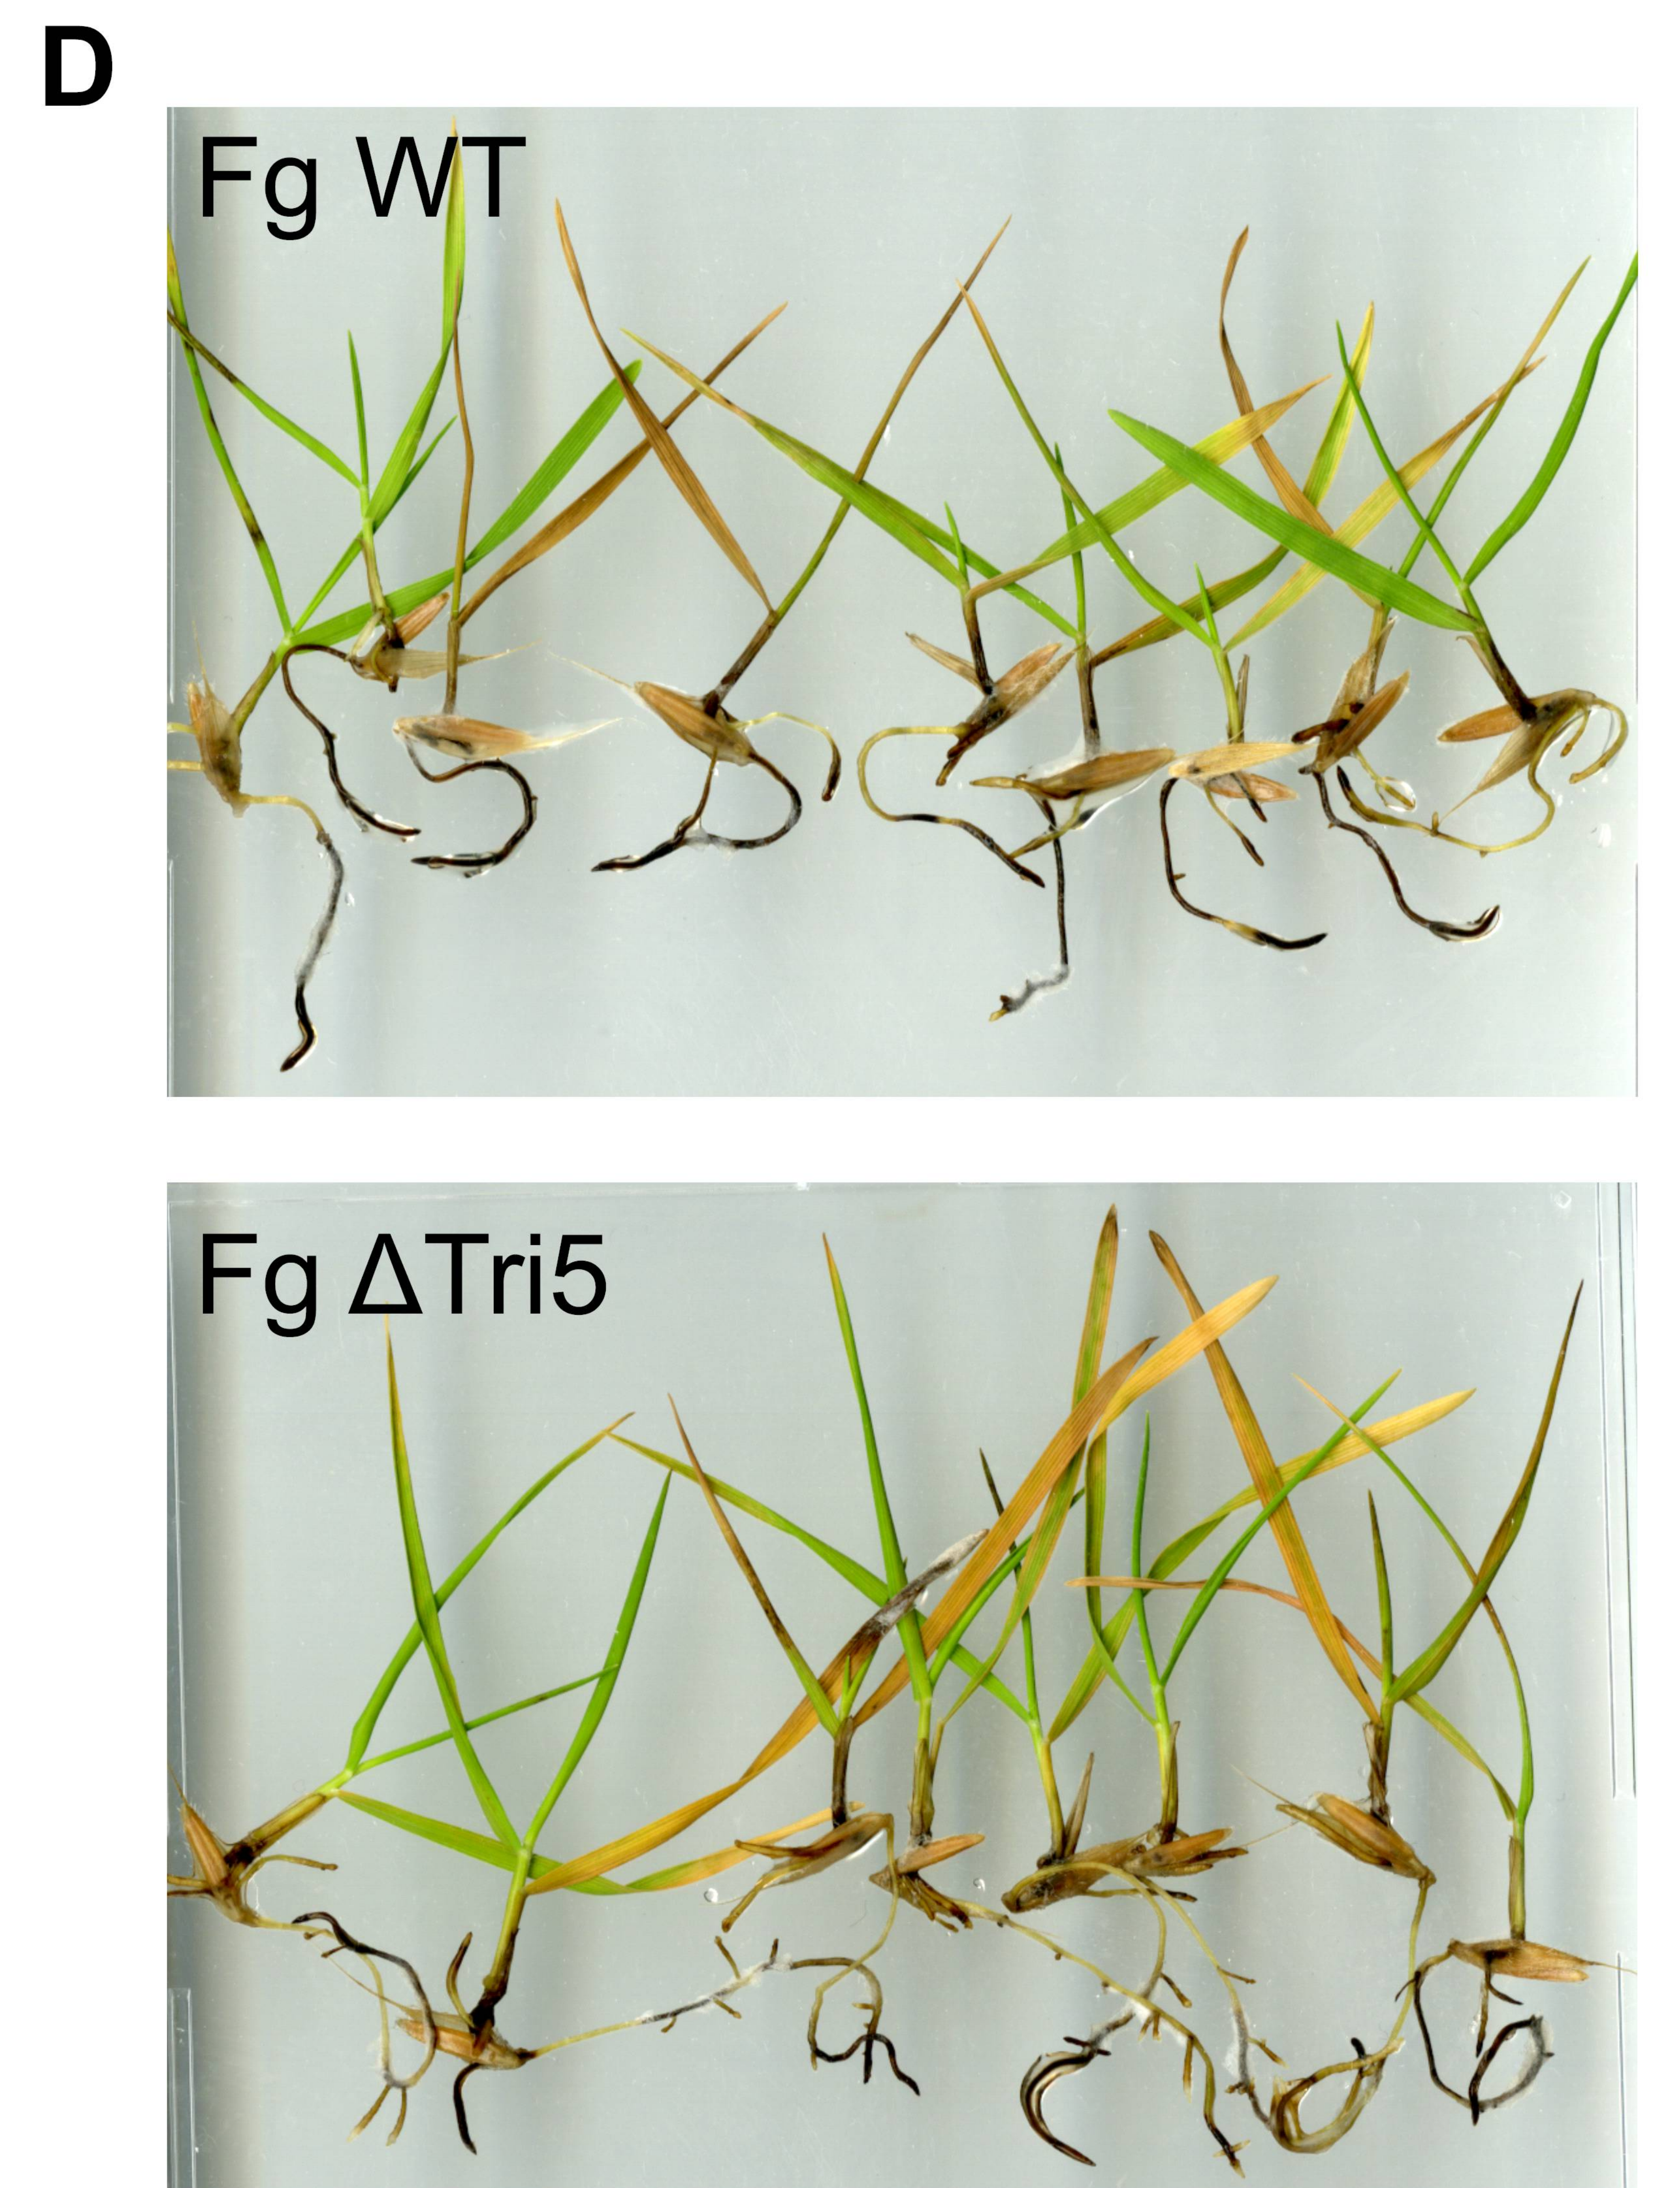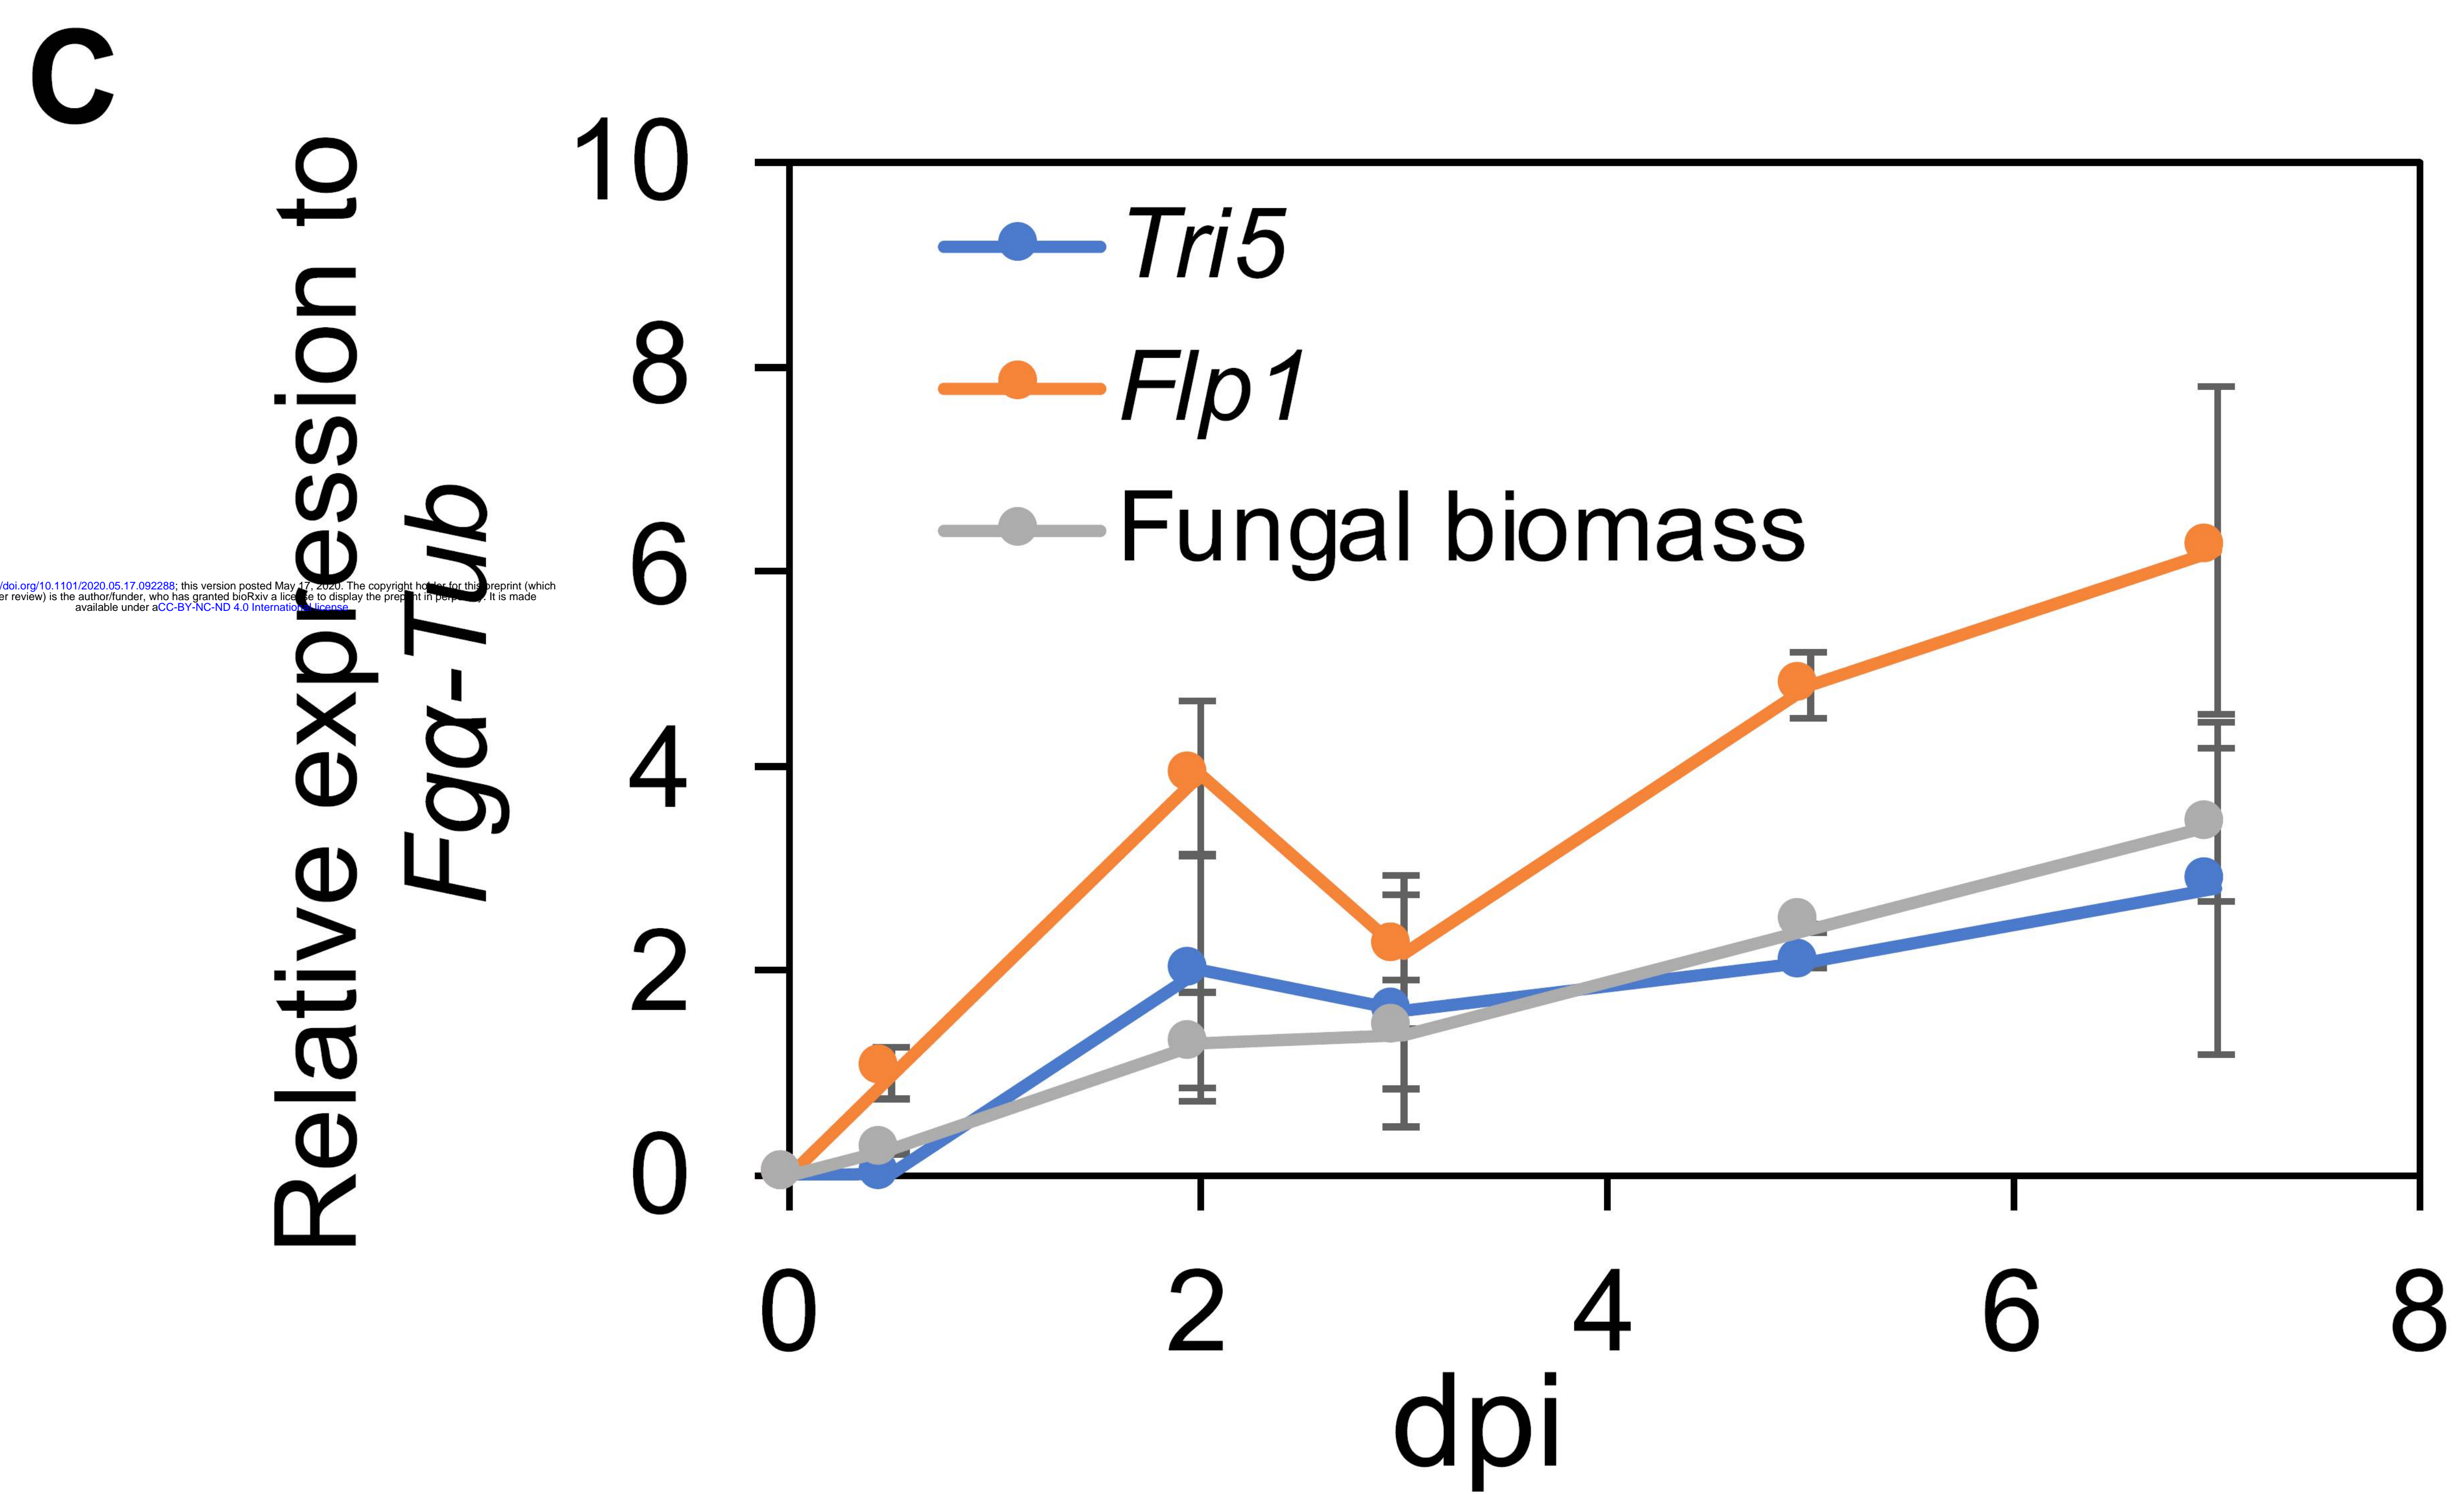



A

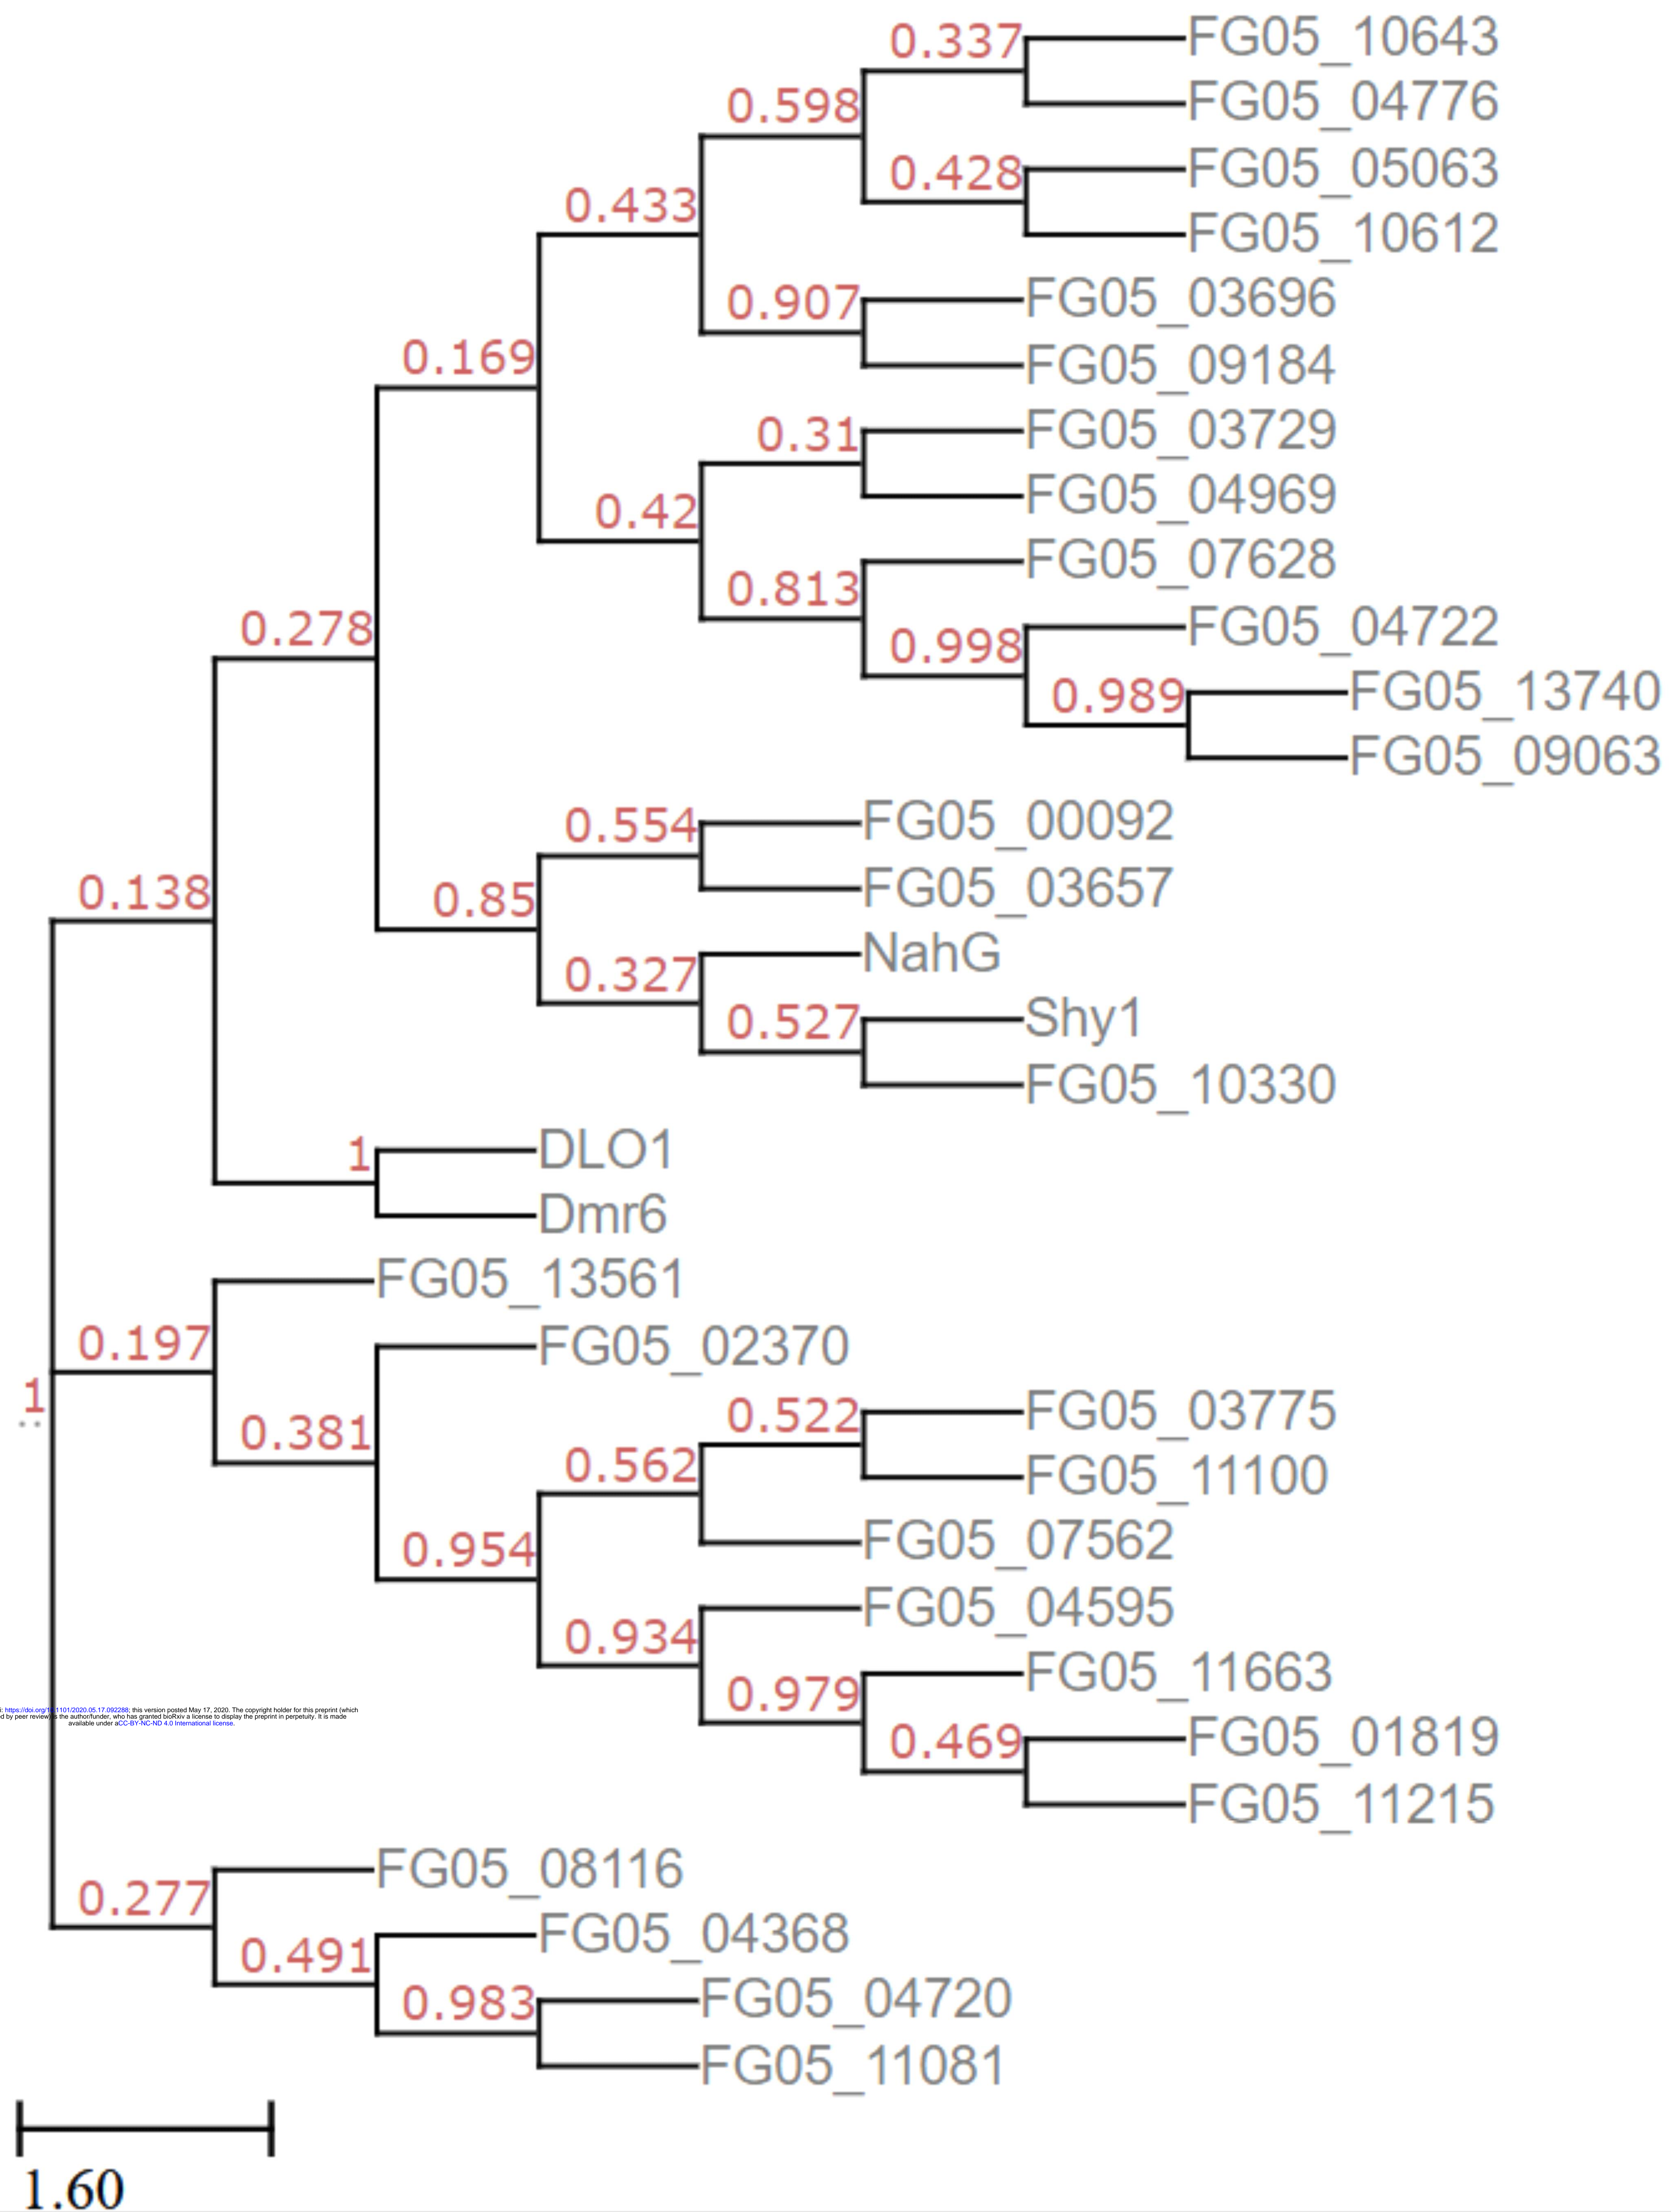

B

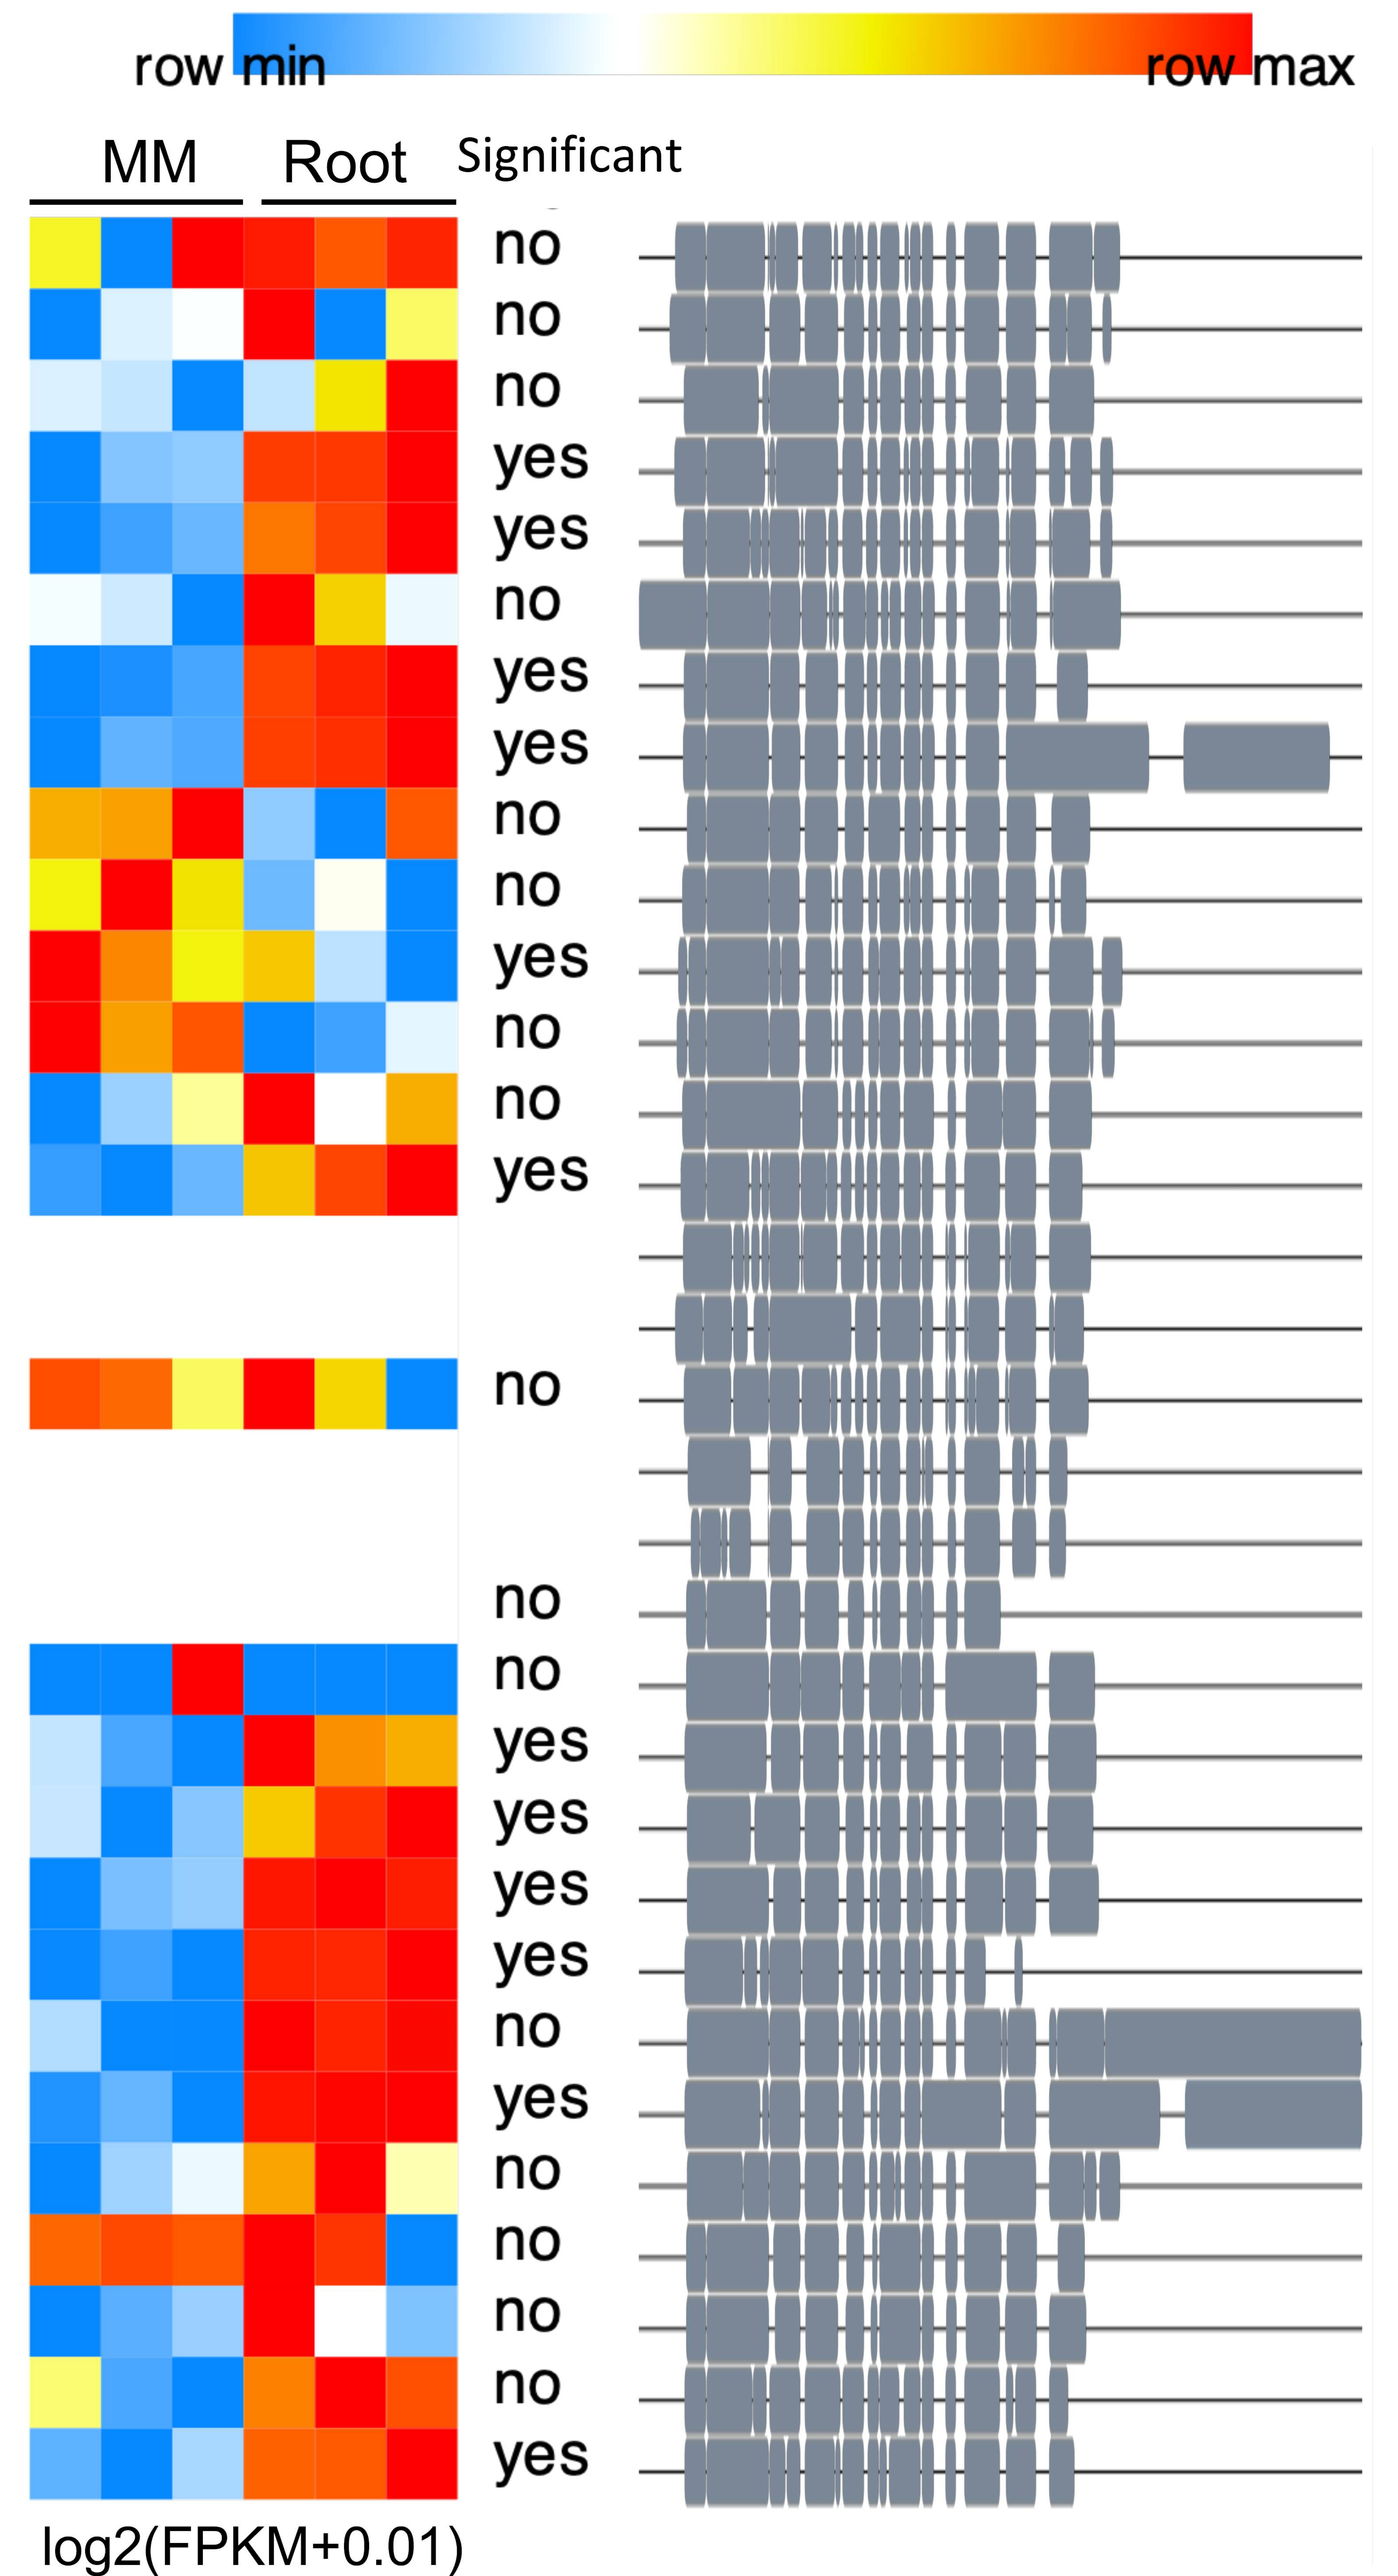

Source: https://www.biorxiv.org/content/10.1101/2020.05.17.092288v1.full.pdf
